# Supplementary material for: Facile synthesis of chiral phenylselenides as novel antioxidants and cytotoxic agents
Source: Royal Society of Chemistry journal article supplement (doi:10.1039/d3ra02475j), 2023-01-01
Supplement: d3ra02475j1.pdf [file d3ra02475j1.pdf]

# Facile approach to chiral phenylselenides – synthesis and activity evaluation

## Supplemental Information

Anna Laskowska<sup>a</sup>, Agata J. Pacuła-Miszewska<sup>a</sup>, Magdalena Obieziurska-Fabisiak<sup>a</sup>, Aneta Jastrzębska<sup>b</sup>  
Katarzyna Gach-Janczak<sup>c</sup>, Anna Janecka<sup>c</sup> and Jacek Ścianowski<sup>a\*</sup>

<sup>a</sup>*Department of Organic Chemistry, Faculty of Chemistry, Nicolaus Copernicus University, 7 Gagarin Street, 87-100 Torun, Poland*

<sup>b</sup>*Department of Analytical Chemistry and Applied Spectroscopy, Faculty of Chemistry, Nicolaus Copernicus University in Torun, 7 Gagarin Street, 87-100 Torun, Poland*

<sup>c</sup>*Department of Biomolecular Chemistry, Faculty of Medicine, Medical University of Lodz, Mazowiecka 6/8, 92-215 Lodz, Poland*

*\*E-mail: [jsch@umk.pl](mailto:jsch@umk.pl)*

### Table of content

1. Analysis data of phenylselenides **6-19**, pages 2-6
2. <sup>1</sup>H, <sup>13</sup>C and <sup>77</sup>Se NMR spectra of phenylselenides **6-19**, pages 7-48
3. Cell lines and cell culture, page 49

## 1. Analysis data of phenylselenides **6-19**

### *N*-(*S*)-(+)-*sec*-butyl-2-(phenylselanyl)benzamide **6**

Yield: 53%; mp 128-129 °C;  $[\alpha]_D^{20} = 14$  (c=0.78, CHCl<sub>3</sub>);

<sup>1</sup>H NMR (400 MHz, DMSO) δ= 0.89 (t, J=7.2 Hz, 3H), 1.13 (d, J=6.8 Hz, 3H), 1.43-1.57 (m, 2H), 3.83-3.92 (m, 1H), 6.86-6.91 (m, 1H<sub>ar</sub>), 7.18-7.25 (m, 2H<sub>ar</sub>), 7.38-7.45 (m, 3H<sub>ar</sub>), 7.55-7.63 (m, 3H<sub>ar</sub>) 8.25 (d, J=10.0 Hz, 1H) <sup>13</sup>C NMR (300 MHz, DMSO) δ= 11.20 (CH<sub>3</sub>), 20.65 (CH<sub>3</sub>), 29.30 (CH<sub>2</sub>), 47.03 (CH), 125.80 (CH<sub>ar</sub>), 128.41 (CH<sub>ar</sub>), 129.20 (CH<sub>ar</sub>), 129.92 (CH<sub>ar</sub>), 130.20 (C<sub>ar</sub>), 130.28 (2xCH<sub>ar</sub>), 131.09 (CH<sub>ar</sub>), 135.20 (C<sub>ar</sub>), 135.24 (C<sub>ar</sub>), 136.61 (2xCH<sub>ar</sub>), 167.41 (C=O) <sup>77</sup>Se NMR (400 MHz, DMSO) δ= 435.47 ppm; IR=3306, 3047, 2967, 2872, 1625, 1583, 1562, 1456, 1437, 1352, 1303, 1282, 1253, 1165, 1146, 1063, 1050, 1022 cm<sup>-1</sup>. Elemental Anal. Calcd for C<sub>17</sub>H<sub>19</sub>NOSe (332.30): C, 61.45; H, 5.76; N, 4.22; Found C, 61.39; H, 5.76; N, 4.24;.

### *N*-(*R*)-(-)-*sec*-butyl-2-(phenylselanyl)benzamide **7**

Yield: 75%; mp 127-128 °C;  $[\alpha]_D^{20} = -16$  (c=0.82, CHCl<sub>3</sub>);

<sup>1</sup>H NMR (400 MHz, DMSO) δ= 0.89 (t, J=7.6 Hz, 3H), 1.13 (d, J=6.8 Hz, 3H), 1.43-1.58 (m, 2H), 3.84-3.92 (m, 1H), 6.85-6.91 (m, 1H<sub>ar</sub>), 7.19-7.24 (m, 2H<sub>ar</sub>), 7.37-7.47 (m, 3H<sub>ar</sub>), 7.55-7.64 (m, 3H<sub>ar</sub>) 8.26 (d, J=10.4 Hz, 1H) <sup>13</sup>C NMR (300 MHz, DMSO) δ= 11.20 (CH<sub>3</sub>), 20.65 (CH<sub>3</sub>), 29.30 (CH<sub>2</sub>), 47.01 (CH), 125.78 (CH<sub>ar</sub>), 128.41 (CH<sub>ar</sub>), 129.20 (CH<sub>ar</sub>), 129.89 (CH<sub>ar</sub>), 130.17 (C<sub>ar</sub>), 130.27 (2xCH<sub>ar</sub>), 131.09 (CH<sub>ar</sub>), 135.16 (C<sub>ar</sub>), 135.26 (C<sub>ar</sub>), 136.62 (2xCH<sub>ar</sub>), 167.40 (C=O) <sup>77</sup>Se NMR (400 MHz, DMSO) δ= 435.53 ppm; IR=3308, 3047, 2965, 2872, 1625, 1583, 1562, 1477, 1437, 1350, 1302, 1282, 1253, 1164, 1146, 1078, 1050, 1021 cm<sup>-1</sup>. Elemental Anal. Calcd for C<sub>17</sub>H<sub>19</sub>NOSe (332.30): C, 61.45; H, 5.76; N, 4.22; Found C, 61.33; H, 5.79; N, 4.20;.

### *N*-(*R*)-(-)-1-hydroxy-2-butanyl-2-(phenylselanyl)benzamide **8**

Yield: 74%; mp 134-136 °C;  $[\alpha]_D^{20} = -11$  (c=1.15, CHCl<sub>3</sub>);

<sup>1</sup>H NMR (400 MHz, DMSO) δ= 0.90 (t, J=7.6 Hz, 3H), 1.38-1.49 (m, 1H), 1.62-1.72 (m, 1H), 3.40-3.53 (m, 2H), 3.78-3.89 (m, 1H), 4.69 (t, J= 5.6 Hz, 1H), 6.84-6.89 (m, 1H<sub>ar</sub>), 7.18-7.24 (m, 2H<sub>ar</sub>), 7.37-7.44 (m, 3H<sub>ar</sub>), 7.56-7.61 (m, 2H<sub>ar</sub>), 7.65-7.69 (m, 1H<sub>ar</sub>), 8.12 (d, J= 8.4 Hz, 1H<sub>ar</sub>) <sup>13</sup>C NMR (300 MHz, DMSO) δ= 11.09 (CH<sub>3</sub>), 24.11 (CH<sub>2</sub>), 53.61 (CH), 63.50 (CH<sub>2</sub>), 125.72 (CH<sub>ar</sub>), 128.54 (CH<sub>ar</sub>), 129.22 (CH<sub>ar</sub>), 129.81 (CH<sub>ar</sub>), 130.20 (C<sub>ar</sub>), 130.28 (2xCH<sub>ar</sub>), 131.14 (CH<sub>ar</sub>), 134.96 (C<sub>ar</sub>), 135.41 (C<sub>ar</sub>), 136.66 (2xCH<sub>ar</sub>), 167.94 (C=O) <sup>77</sup>Se NMR (400 MHz, DMSO) δ= 437.11 ppm; IR=3280,

3069, 2967, 2920. 2873, 1628, 1584, 1561, 1458, 1378, 1336, 1316, 1282, 1254, 1223, 1167, 1096, 1048, 1022 cm<sup>-1</sup>. Elemental Anal. Calcd for C<sub>17</sub>H<sub>19</sub>NO<sub>2</sub>Se (348.30): C, 58.62; H, 5.50; N, 4.02; Found C, 58.60; H, 5.48; N, 3.99;

*N*-(*S*)-(+)-1-hydroxy-2-butanyl-2-(phenylselanyl)benzamide **9**

Yield: 68%; mp 134-135 °C;  $[\alpha]_D^{20} = 12$  (c=1.04, CHCl<sub>3</sub>);

<sup>1</sup>H NMR (400 MHz, DMSO) δ= 0.90 (t, J=8 Hz, 3H), 1.37-1.50 (m, 1H), 1.60-1.71 (m, 1H), 3.35-3.51 (m, 2H), 3.77-3.88 (m, 1H), 4.68 (t, J= 6 Hz, 1H), 6.85-6.90 (m, 1H<sub>ar</sub>), 7.19-7.24 (m, 2H<sub>ar</sub>), 7.37-7.42 (m, 3H<sub>ar</sub>), 7.56-7.62 (m, 2H<sub>ar</sub>), 7.64-7.69 (m, 1H<sub>ar</sub>), 8.12 (d, J= 8.4 Hz, 1H<sub>ar</sub>) <sup>13</sup>C NMR (300 MHz, DMSO) δ= 11.09 (CH<sub>3</sub>), 24.11 (CH<sub>2</sub>), 53.61 (CH), 63.50 (CH<sub>2</sub>), 125.73 (CH<sub>ar</sub>), 128.55 (CH<sub>ar</sub>), 129.22 (CH<sub>ar</sub>), 129.81 (CH<sub>ar</sub>), 130.19 (C<sub>ar</sub>), 130.28 (2xCH<sub>ar</sub>), 131.15 (CH<sub>ar</sub>), 134.96 (C<sub>ar</sub>), 135.40 (C<sub>ar</sub>), 136.67 (2xCH<sub>ar</sub>), 167.94 (C=O) <sup>77</sup>Se NMR (400 MHz, DMSO) δ= 436.97 ppm; IR=3279, 3068, 2967, 2920. 2873, 1628, 1584, 1561, 1458, 1377, 1337, 1316, 1282, 1255, 1228, 1166, 1095, 1048, 1022 cm<sup>-1</sup>. Elemental Anal. Calcd for C<sub>17</sub>H<sub>19</sub>NO<sub>2</sub>Se (348.30): C, 58.62; H, 5.50; N, 4.02; Found C, 58.55; H, 5.53; N, 4.02;

*N*-(*R*)-(-)-1,2,3,4-tetrahydro-1-naphthyl-2-(phenylselanyl)benzamide **10**

Yield: 59 %; mp 100-103 °C;  $[\alpha]_D^{20} = -20$  (c=1.28, CHCl<sub>3</sub>);

<sup>1</sup>H NMR (400 MHz, DMSO) δ= 1.72-1.81 (m, 2H), 1.89-2.03 (m, 2H), 2.71-2.82 (m, 2H), 5.13-5.27 (m, 1H), 6.87-6.93 (m, 1H<sub>ar</sub>), 7.09-7.29 (m, 6H<sub>ar</sub>), 7.38-7.44 (m, 3H<sub>ar</sub>), 7.58-7.69 (m, 3H<sub>ar</sub>), 8.89 (d, J=8.8 Hz, 1H) <sup>13</sup>C NMR (700 MHz, DMSO) δ= 20.84 (CH<sub>2</sub>), 29.35 (CH<sub>2</sub>), 30.33 (CH<sub>2</sub>), 47.71 (CH), 125.86 (CH<sub>ar</sub>), 126.33 (CH<sub>ar</sub>), 127.17 (CH<sub>ar</sub>), 128.40 (CH<sub>ar</sub>), 128.63 (CH<sub>ar</sub>), 129.24 (2xCH<sub>ar</sub>), 130.05 (C<sub>ar</sub>), 130.31 (3xCH<sub>ar</sub>), 131.28 (CH<sub>ar</sub>), 134.82 (C<sub>ar</sub>), 135.45 (C<sub>ar</sub>), 136.60 (2xCH<sub>ar</sub>), 137.68 (C<sub>ar</sub>), 137.87 (C<sub>ar</sub>), 167.66 (C=O) <sup>77</sup>Se NMR (700 MHz, DMSO) δ= 437.50 ppm; IR=3282, 3054, 2924, 2854, 1627, 1583, 1561, 1492, 1435, 1336, 1320, 1273, 1257, 1208, 1157, 1114, 1081, 1040, 1019 cm<sup>-1</sup>. Elemental Anal. Calcd for C<sub>23</sub>H<sub>21</sub>NOSe (406.38): C, 67.98; H, 5.21; N, 3.45; Found C, 67.88; H, 5.17; N, 3.41;

*N*-(*S*)-(+)-1,2,3,4-tetrahydro-1-naphthyl-2-(phenylselanyl)benzamide **11**

Yield: 47 %; mp 101-102 °C;  $[\alpha]_D^{20} = 24$  (c=1.03, CHCl<sub>3</sub>);

<sup>1</sup>H NMR (400 MHz, DMSO) δ= 1.70-1.80 (m, 2H), 1.94-2.03 (m, 2H), 2.71-2.81 (m, 2H), 5.15-5.26 (m, 1H), 6.89-6.93 (m, 1H<sub>ar</sub>), 7.09-7.29 (m, 6H<sub>ar</sub>), 7.39-7.46 (m, 3H<sub>ar</sub>), 7.60-7.69 (m, 3H<sub>ar</sub>), 8.89 (d, J=8.8 Hz, 1H) <sup>13</sup>C NMR (400 MHz, DMSO) δ= 20.84 (CH<sub>2</sub>), 29.35 (CH<sub>2</sub>), 30.32 (CH<sub>2</sub>), 47.70 (CH), 125.85 (CH<sub>ar</sub>), 126.33 (CH<sub>ar</sub>), 127.18 (CH<sub>ar</sub>), 128.40 (CH<sub>ar</sub>), 128.63 (CH<sub>ar</sub>), 129.25 (2xCH<sub>ar</sub>), 130.02 (C<sub>ar</sub>), 130.32 (3xCH<sub>ar</sub>), 131.30 (CH<sub>ar</sub>),

134.76 (C<sub>ar</sub>), 135.49 (C<sub>ar</sub>), 136.63 (2xCH<sub>ar</sub>), 137.68 (C<sub>ar</sub>), 137.86 (C<sub>ar</sub>), 167.65 (C=O) <sup>77</sup>Se NMR (700 MHz, DMSO) δ= 436.95 ppm; IR=3280, 3058, 2921, 2852, 1626, 1583, 1562, 1493, 1436, 1338, 1320, 1271, 1258, 1201, 1181, 1115, 1081, 1030, 1018 cm<sup>-1</sup>. Elemental Anal. Calcd for C<sub>23</sub>H<sub>21</sub>NOSe (406.38): C, 67.98; H, 5.21; N, 3.45; Found C, 67.92; H, 5.22; N, 3.43;

**N-(R)-(+)-α-methylbenzyl- 2-(phenylselanyl)benzamide 12**

Yield: 74 %; mp 147-148°C; [α]<sub>D</sub><sup>20</sup> =22 (c=0.52, CHCl<sub>3</sub>);

<sup>1</sup>H NMR (700 MHz, DMSO) δ= 1.49 (d, J=7 Hz, 3H), 5.14-5.19 (m, 1H), 6.88-6.91 (m, 1H<sub>ar</sub>) 7.23-7.29 (m, 3H<sub>ar</sub>), 7.34-7.37 (m, 2H<sub>ar</sub>), 7.41-7.46 (m, 5H<sub>ar</sub>), 7.58-7.61 (m, 2H<sub>ar</sub>), 7.75-7.77 (m, 1H<sub>ar</sub>), 8.96 (d, J=7.7 Hz, 1H) <sup>13</sup>C NMR (300 MHz, DMSO) δ= 22.82 (CH<sub>3</sub>), 43.04 (CH), 125.78 (CH<sub>ar</sub>), 126.57 (2xCH<sub>ar</sub>), 127.13 (CH<sub>ar</sub>), 128.73 (3xCH<sub>ar</sub>), 129.29 (CH<sub>ar</sub>), 129.85 (CH<sub>ar</sub>), 130.13 (C<sub>ar</sub>), 130.31 (2xCH<sub>ar</sub>), 131.38 (CH<sub>ar</sub>), 134.29 (C<sub>ar</sub>), 135.71 (C<sub>ar</sub>), 136.72 (2xCH<sub>ar</sub>), 145.13 (C<sub>ar</sub>), 167.12 (C=O) <sup>77</sup>Se NMR (400 MHz, DMSO) δ= 437.91 ppm; IR=3325, 3063, 2977, 2928, 1627, 1584, 1564, 1522, 1493, 1462, 1434, 1374, 1320, 1278, 1259, 1210, 1157, 1133, 1096, 1063, 1030, 1013. Elemental Anal. Calcd for C<sub>21</sub>H<sub>19</sub>NOSe (380.43): C, 66.32; H, 5.04; N, 3.68; Found C, 66.28; H, 5.05; N, 3.71;.

**N-(S)-(-)-α-methylbenzyl-2-(phenylselanyl)benzamide 13**

Yield: 87 %; mp 147-149°C; [α]<sub>D</sub><sup>20</sup> =-18 (c=0.51, CHCl<sub>3</sub>);

<sup>1</sup>H NMR (400 MHz, DMSO) δ= 1.46 (d, J=7.2 Hz, 3H), 5.10-5.18 (m, 1H), 6.85-6.89 (m, 1H<sub>ar</sub>) 7.20-7.26 (m, 2H<sub>ar</sub>), 7.30-7.35 (m, 2H<sub>ar</sub>), 7.39-7.45 (m, 5H<sub>ar</sub>), 7.55-7.61 (m, 2H<sub>ar</sub>), 7.72-7.76 (m, 1H<sub>ar</sub>), 8.94 (d, J=8 Hz, 1H) <sup>13</sup>C NMR (300 MHz, DMSO) δ= 22.81 (CH<sub>3</sub>), 49.04 (CH), 125.79 (CH<sub>ar</sub>), 126.54 (2xCH<sub>ar</sub>), 127.13 (CH<sub>ar</sub>), 128.73 (3xCH<sub>ar</sub>), 129.28 (CH<sub>ar</sub>), 129.88 (CH<sub>ar</sub>), 130.14 (C<sub>ar</sub>), 130.30 (2xCH<sub>ar</sub>), 131.36 (CH<sub>ar</sub>), 134.34 (C<sub>ar</sub>), 135.67 (C<sub>ar</sub>), 136.70 (2xCH<sub>ar</sub>), 145.12 (C<sub>ar</sub>), 167.13 (C=O) <sup>77</sup>Se NMR (400 MHz, DMSO) δ= 437.90 ppm; IR=3327, 3063, 2977, 2869, 1628, 1584, 1565, 1523, 1493, 1461, 1434, 1374, 1320, 1278, 1259, 1210, 1158, 1133, 1073, 1062, 1030, 1013. Elemental Anal. Calcd for C<sub>21</sub>H<sub>19</sub>NOSe (380.43): C, 66.32; H, 5.04; N, 3.68; Found C, 66.34; H, 5.03; N, 3.73;.

**N-(S)-(-)-1-(1-naphthyl)ethyl-2-(phenylselanyl)benzamide 14**

Yield: 67%; mp 58-59°C; [α]<sub>D</sub><sup>20</sup> =-14 (c=1.42, CHCl<sub>3</sub>);

$^1\text{H}$  NMR (400 MHz, DMSO)  $\delta$ = 1.62 (d,  $J$ =6.8 Hz, 3H), 5.93 (p,  $J$ =7.2 Hz, 1H), 6.87-6.92 (m, 1H<sub>ar</sub>), 7.21-7.28 (m, 2H<sub>ar</sub>), 7.38-7.48 (m, 3H<sub>ar</sub>), 7.49-7.61 (m, 5H<sub>ar</sub>), 7.63-7.69 (m, 1H<sub>ar</sub>), 7.71-7.76 (m, 1H<sub>ar</sub>), 7.81-7.87 (m, 1H<sub>ar</sub>), 7.92-7.97 (m, 1H<sub>ar</sub>), 8.24 (d,  $J$ =8.4 Hz, 1H<sub>ar</sub>), 9.10 (d,  $J$ =8.0 Hz, 1H<sub>ar</sub>)  $^{13}\text{C}$  NMR (300 MHz, DMSO)  $\delta$ = 21.96 (CH<sub>3</sub>), 45.36 (CH), 123.07 (CH<sub>ar</sub>), 123.70 (CH<sub>ar</sub>), 125.80 (CH<sub>ar</sub>), 125.96 (CH<sub>ar</sub>), 126.08 (CH<sub>ar</sub>), 126.68 (CH<sub>ar</sub>), 127.77 (CH<sub>ar</sub>), 128.74 (CH<sub>ar</sub>), 129.13 (CH<sub>ar</sub>), 129.26 (CH<sub>ar</sub>), 129.93 (CH<sub>ar</sub>), 130.20 (C<sub>ar</sub>), 130.30 (2xCH<sub>ar</sub>), 130.88 (C<sub>ar</sub>), 131.36 (CH<sub>ar</sub>), 133.85 (C<sub>ar</sub>), 134.47 (C<sub>ar</sub>), 135.59 (C<sub>ar</sub>), 136.67 (2xCH<sub>ar</sub>), 140.58 (C<sub>ar</sub>), 167.10 (C=O)  $^{77}\text{Se}$  NMR (400 MHz, DMSO)  $\delta$ = 437.54 ppm; IR=3276, 3052, 2969, 2852, 1621, 1583, 1526, 1477, 1455, 1374, 1337, 1308, 1277, 1181, 1156, 1123, 1081, 1031, 1021 cm<sup>-1</sup>. Elemental Anal. Calcd for C<sub>26</sub>H<sub>21</sub>N<sub>2</sub>OSe (430.30): C, 69.76; H, 4.92; N, 3.25; Found C, 69.85; H, 4.83; N, 3.18;.

*N*-(*R*)-(+)-1-(1-naphthyl)ethyl-2-(phenylselanyl)benzamide **15**

Yield: 92%; mp 59-60°C;  $[\alpha]_D^{20} = 16$  ( $c$ =1.24, CHCl<sub>3</sub>);

$^1\text{H}$  NMR (400 MHz, DMSO)  $\delta$ = 1.61 (d,  $J$ =6.8 Hz, 3H), 5.93 (p,  $J$ =7.2 Hz, 1H), 6.82-6.91 (m, 1H<sub>ar</sub>), 7.21-7.26 (m, 2H<sub>ar</sub>), 7.38-7.45 (m, 3H<sub>ar</sub>), 7.48-7.61 (m, 5H<sub>ar</sub>), 7.64-7.67 (m, 1H<sub>ar</sub>), 7.72-7.76 (m, 1H<sub>ar</sub>), 7.81-7.86 (m, 1H<sub>ar</sub>), 7.93-7.97 (m, 1H<sub>ar</sub>), 8.24 (d,  $J$ =8 Hz, 1H<sub>ar</sub>), 9.12 (d,  $J$ =7.6 Hz, 1H<sub>ar</sub>)  $^{13}\text{C}$  NMR (300 MHz, DMSO)  $\delta$ = 21.96 (CH<sub>3</sub>), 45.36 (CH), 123.08 (CH<sub>ar</sub>), 123.70 (CH<sub>ar</sub>), 125.81 (CH<sub>ar</sub>), 125.96 (CH<sub>ar</sub>), 126.08 (CH<sub>ar</sub>), 126.68 (CH<sub>ar</sub>), 127.76 (CH<sub>ar</sub>), 128.74 (CH<sub>ar</sub>), 129.13 (CH<sub>ar</sub>), 129.26 (CH<sub>ar</sub>), 129.95 (CH<sub>ar</sub>), 130.18 (C<sub>ar</sub>), 130.30 (2xCH<sub>ar</sub>), 130.85 (C<sub>ar</sub>), 131.36 (CH<sub>ar</sub>), 133.86 (C<sub>ar</sub>), 134.48 (C<sub>ar</sub>), 135.60 (C<sub>ar</sub>), 136.66 (2xCH<sub>ar</sub>), 140.58 (C<sub>ar</sub>), 167.11 (C=O)  $^{77}\text{Se}$  NMR (400 MHz, DMSO)  $\delta$ = 437.40 ppm; IR=3278, 3050, 2970, 2852, 1621, 1584, 1526, 1476, 1451, 1373, 1337, 1307, 1277, 1180, 1156, 1123, 1080, 1031, 1020 cm<sup>-1</sup>. Elemental Anal. Calcd for C<sub>26</sub>H<sub>21</sub>N<sub>2</sub>OSe (430.30): C, 69.76; H, 4.92; N, 3.25; Found C, 69.89; H, 4.94; N, 3.29;.

*N*-(1*S*,2*R*)-(-)-*cis*-2-hydrokxy-1-indanyl-2-(phenylselanyl)benzamide **16**

Yield: 51%; mp 172-173 °C;  $[\alpha]_D^{20} = -17$  ( $c$ =0.77, CHCl<sub>3</sub>);

$^1\text{H}$  NMR (400 MHz, DMSO)  $\delta$ = 2.83-2.92 (m, 1H), 3.05-3.15 (m, 1H), 4.50-4.57 (m, 1H), 5.12 (d,  $J$ =4.4 Hz, 1H), 5.38-5.45 (m, 1H), 6.87-6.92 (m, 1H<sub>ar</sub>), 7.17-7.30 (m, 6H<sub>ar</sub>), 7.39-7.48 (m, 3H<sub>ar</sub>), 7.60-7.66 (m, 2H<sub>ar</sub>), 7.80-7.85 (m, 1H<sub>ar</sub>), 8.34 (d,  $J$ =8.8 Hz, 1H)  $^{13}\text{C}$  NMR (400 MHz, DMSO)  $\delta$ = 39.23 (CH<sub>2</sub>), 57.89 (CH), 72.58 (CH), 124.84 (CH<sub>ar</sub>), 125.34 (CH<sub>ar</sub>), 125.82 (CH<sub>ar</sub>), 126.82 (CH<sub>ar</sub>), 127.91 (CH<sub>ar</sub>), 129.05 (CH<sub>ar</sub>), 129.31 (CH<sub>ar</sub>), 129.83 (CH<sub>ar</sub>), 130.22 (C<sub>ar</sub>), 130.34 (2xCH<sub>ar</sub>), 131.46 (CH<sub>ar</sub>), 134.18 (C<sub>ar</sub>), 135.82 (C<sub>ar</sub>), 136.73 (2xCH<sub>ar</sub>), 141.35 (C<sub>ar</sub>), 142.17 (C<sub>ar</sub>), 168.22 (C=O)  $^{77}\text{Se}$  NMR (400 MHz, DMSO)  $\delta$ = 439.55 ppm; IR=3286, 3052, 2921, 2852, 1629, 1584, 1561, 1478, 1437, 1349, 1318, 1295, 1278, 1186, 1080, 1058, 1019cm<sup>-1</sup>. Elemental Anal. Calcd for C<sub>22</sub>H<sub>19</sub>NO<sub>2</sub>Se (408.35): C, 64.71; H, 5.04; N, 3.43; Found C, 64.63; H, 4.68; N, 3.47;.

*N*-(1*R*,2*S*)-(+)-*cis*-2-hydroksy-1-indanyl-2-(phenylselanyl)benzamide **17**

Yield: 45%; mp 173-174 °C;  $[\alpha]_D^{20} = 16$  (c=0.87, CHCl<sub>3</sub>);

<sup>1</sup>H NMR (400 MHz, DMSO) δ= 2.74-2.82 (m, 1H), 3.06-3.15 (m, 1H), 4.50-4.58 (m, 1H), 5.11 (d, J=4.4 Hz, 1H), 5.39-5.47 (m, 1H), 6.88-6.92(m, 1H<sub>ar</sub>), 7.18-7.31 (m, 6H<sub>ar</sub>), 7.41-7.46 (m, 3H<sub>ar</sub>), 7.61-7.65 (m, 2H<sub>ar</sub>), 7.80-7.85 (m, 1H<sub>ar</sub>), 8.34 (d, J=8.8 Hz, 1H) <sup>13</sup>C NMR (300 MHz, DMSO) δ= 39.06 (CH<sub>2</sub>), 57.89 (CH), 72.57 (CH), 124.83 (CH<sub>ar</sub>), 125.33 (CH<sub>ar</sub>), 125.81 (CH<sub>ar</sub>), 126.82 (CH<sub>ar</sub>), 127.90 (CH<sub>ar</sub>), 129.05 (CH<sub>ar</sub>), 129.31 (CH<sub>ar</sub>), 129.81 (CH<sub>ar</sub>) 130.21 (C<sub>ar</sub>), 130.34 (2xCH<sub>ar</sub>), 131.45 (CH<sub>ar</sub>), 134.17 (C<sub>ar</sub>), 135.87 (C<sub>ar</sub>), 136.73 (2xCH<sub>ar</sub>), 141.34 (C<sub>ar</sub>), 142.21 (C<sub>ar</sub>), 168.21 (C=O) <sup>77</sup>Se NMR (400 MHz, DMSO) δ= 438.74 ppm; IR=3284, 3052, 2921, 2852, 1629, 1583, 1560, 1477, 1437, 1348, 1318, 1295, 1278, 1214, 1185, 1080, 1058, 1019 cm<sup>-1</sup>. Elemental Anal. Calcd for C<sub>22</sub>H<sub>19</sub>NO<sub>2</sub>Se (408.35): C, 64.71; H, 5.04; N, 3.43; Found C, 64.74; H, 4.70; N, 3.45;.

*N*-(1*S*,2*S*)-(+)-*trans*-2-hydroksy-1-indanyl- 2-(phenylselanyl)benzamide **18**

Yield: 30%; mp 143-144 °C;  $[\alpha]_D^{20} = 27$  (c=0.51, CHCl<sub>3</sub>);

<sup>1</sup>H NMR (400 MHz, DMSO) δ= 2.70-2.80 (m, 1H), 3.11-3.21 (m, 1H), 4.38-4.48 (m, 1H), 5.25 (t, J=8 Hz, 1H), 5.40 (d, J=5.6 Hz, 1H), 6.89-6.93(m, 1H<sub>ar</sub>), 7.18-7.26 (m, 6H<sub>ar</sub>), 7.40-7.47 (m, 3H<sub>ar</sub>), 7.61-7.64 (m, 2H<sub>ar</sub>), 7.72-7.76 (m, 1H<sub>ar</sub>), 8.87 (d, J=8.4 Hz, 1H) <sup>13</sup>C NMR (700 MHz, DMSO) δ= 39.22 (CH<sub>2</sub>), 62.01 (CH), 77.80 (CH), 124.40 (CH<sub>ar</sub>), 125.12 (CH<sub>ar</sub>), 125.75 (CH<sub>ar</sub>), 127.17 (CH<sub>ar</sub>), 128.10 (CH<sub>ar</sub>), 128.73 (CH<sub>ar</sub>), 129.32 (CH<sub>ar</sub>), 129.82 (CH<sub>ar</sub>) 130.22 (C<sub>ar</sub>), 130.34 (2xCH<sub>ar</sub>), 131.41 (CH<sub>ar</sub>), 134.34 (C<sub>ar</sub>), 135.85 (C<sub>ar</sub>), 136.78 (2xCH<sub>ar</sub>), 140.30 (C<sub>ar</sub>), 142.30 (C<sub>ar</sub>), 168.34 (C=O) <sup>77</sup>Se NMR (700 MHz, DMSO) δ= 438.84 ppm; IR=3263, 3069, 2957, 2872, 1637, 1586, 1531, 1459, 1447, 1371, 1342, 1257, 1120, 1099, 1072, 1020 cm<sup>-1</sup>. Elemental Anal. Calcd for C<sub>22</sub>H<sub>19</sub>NO<sub>2</sub>Se (408.35): C, 64.71; H, 5.04; N, 3.43; Found C, 64.79; H, 4.70; N, 3.45;.

*N*-(1*R*,2*R*)-(-)-*trans*-2-hydroksy-1-indanyl- 2-(phenylselanyl)benzamide **19**

Yield: 35%; mp 145-146 °C;  $[\alpha]_D^{20} = -25$  (c=0.57, CHCl<sub>3</sub>);

<sup>1</sup>H NMR (400 MHz, DMSO) δ= 2.70-2.80 (m, 1H), 3.10-3.20 (m, 1H), 4.39-4.46 (m, 1H), 5.24 (t, J=7.6 Hz, 1H), 5.39 (d, J=6 Hz, 1H), 6.89-6.93(m, 1H<sub>ar</sub>), 7.18-7.27 (m, 6H<sub>ar</sub>), 7.40-7.47 (m, 3H<sub>ar</sub>), 7.60-7.64 (m, 2H<sub>ar</sub>), 7.71-7.77 (m, 1H<sub>ar</sub>), 8.86 (d, J=8.4 Hz, 1H) <sup>13</sup>C NMR (700 MHz, DMSO) δ= 39.24 (CH<sub>2</sub>), 62.05 (CH), 77.81 (CH), 124.43 (CH<sub>ar</sub>), 125.12 (CH<sub>ar</sub>), 125.76 (CH<sub>ar</sub>), 127.17 (CH<sub>ar</sub>), 128.10 (CH<sub>ar</sub>), 128.73 (CH<sub>ar</sub>), 129.30 (CH<sub>ar</sub>), 129.87 (CH<sub>ar</sub>) 130.25 (C<sub>ar</sub>), 130.34 (2xCH<sub>ar</sub>), 131.40 (CH<sub>ar</sub>), 134.42 (C<sub>ar</sub>), 135.80 (C<sub>ar</sub>), 136.75 (2xCH<sub>ar</sub>), 140.33 (C<sub>ar</sub>), 142.31 (C<sub>ar</sub>), 168.36 (C=O) <sup>77</sup>Se NMR (700 MHz, DMSO) δ= 439.99 ppm; IR=3256, 3045, 2923, 2846, 1634, 1584, 1528, 1477, 1435, 1342, 1309, 1285, 1215, 1173, 1123, 1062, 1021 cm<sup>-1</sup>. Elemental Anal. Calcd for C<sub>22</sub>H<sub>19</sub>NO<sub>2</sub>Se (408.35): C, 64.71; H, 5.04; N, 3.43; Found C, 64.78; H, 4.72; N, 3.40;.

2.  $^1\text{H}$ ,  $^{13}\text{C}$  and  $^{77}\text{Se}$  NMR spectra of phenylselenides **6-19**

*N*-(*S*)-(+)-*sec*-butyl-2-(phenylselanyl)benzamide **6**

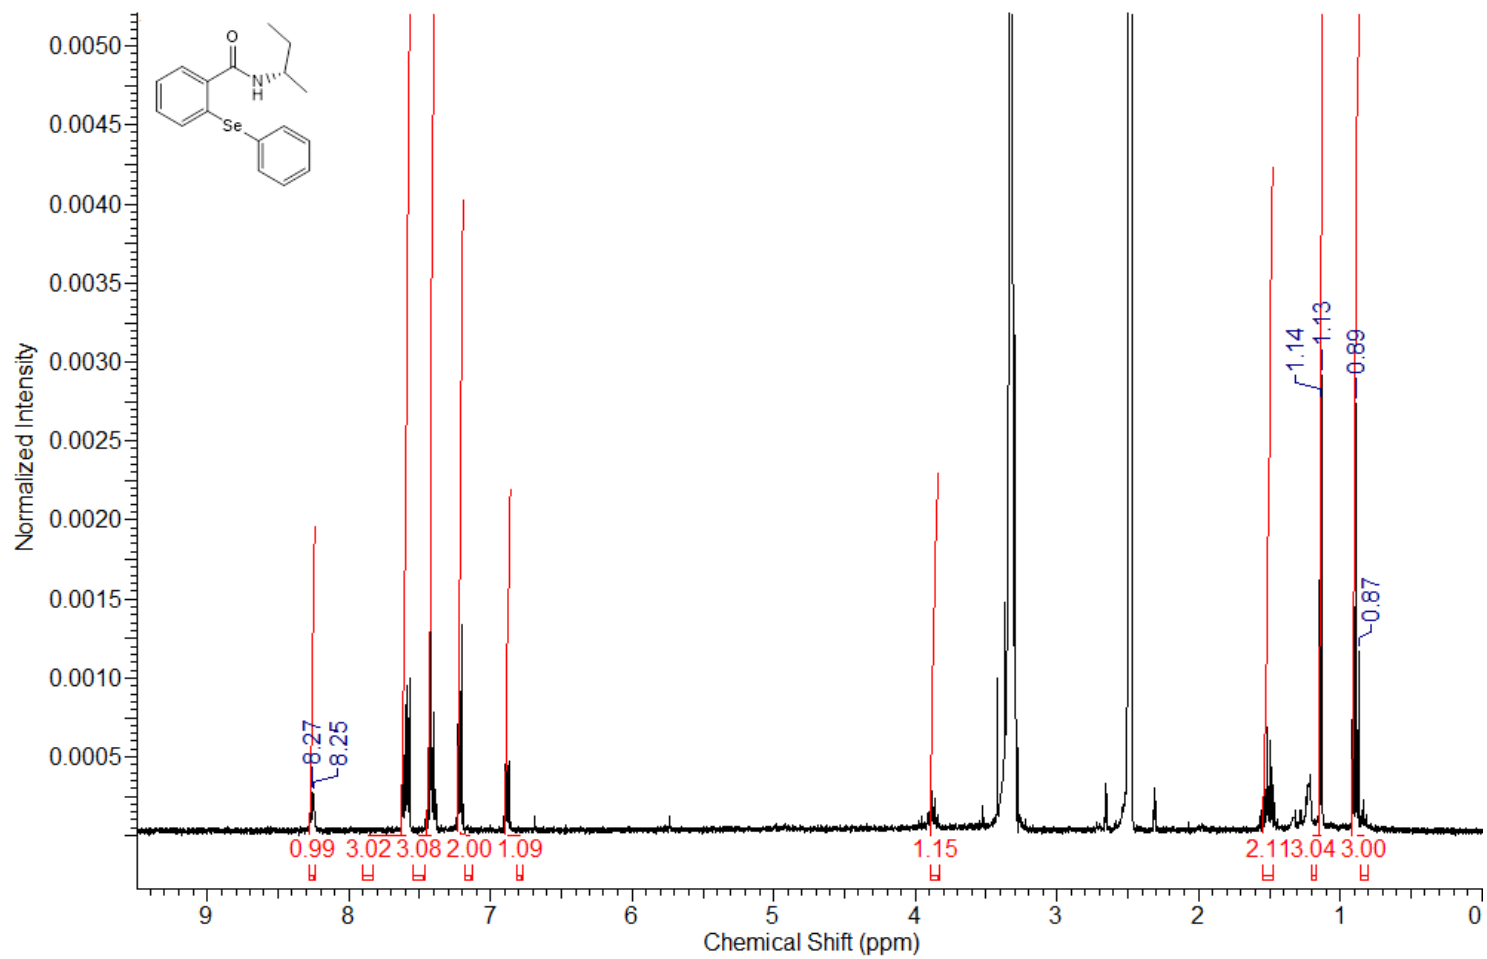

<sup>1</sup>H NMR spectra



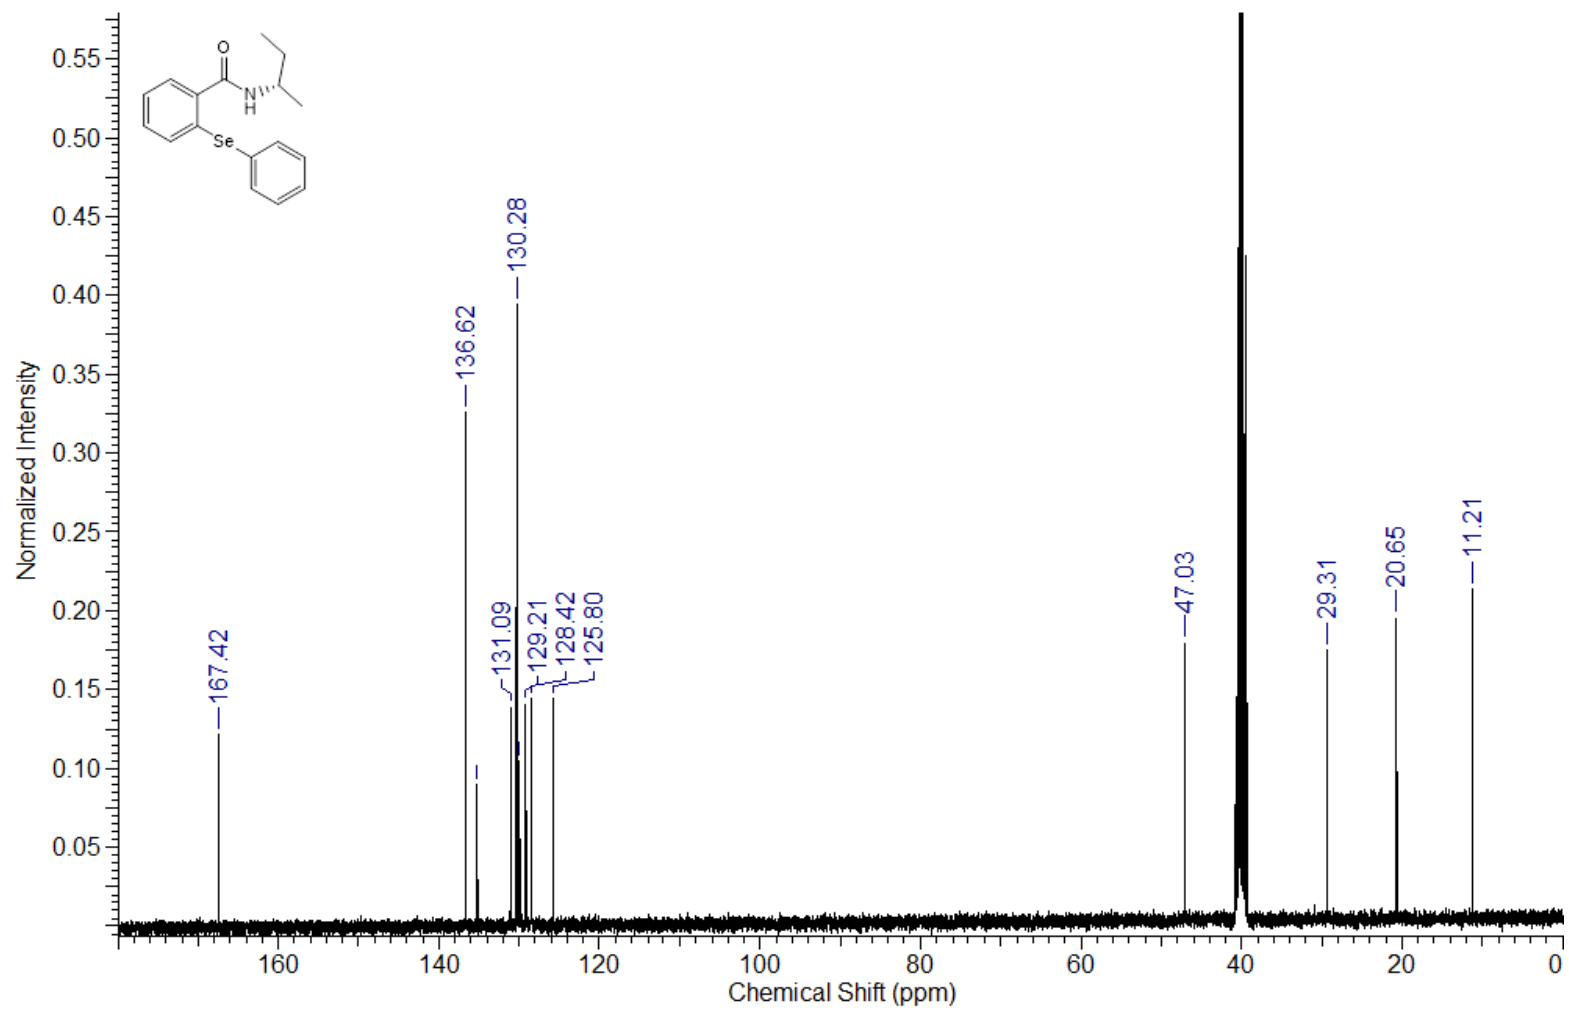

<sup>13</sup>C NMR spectra

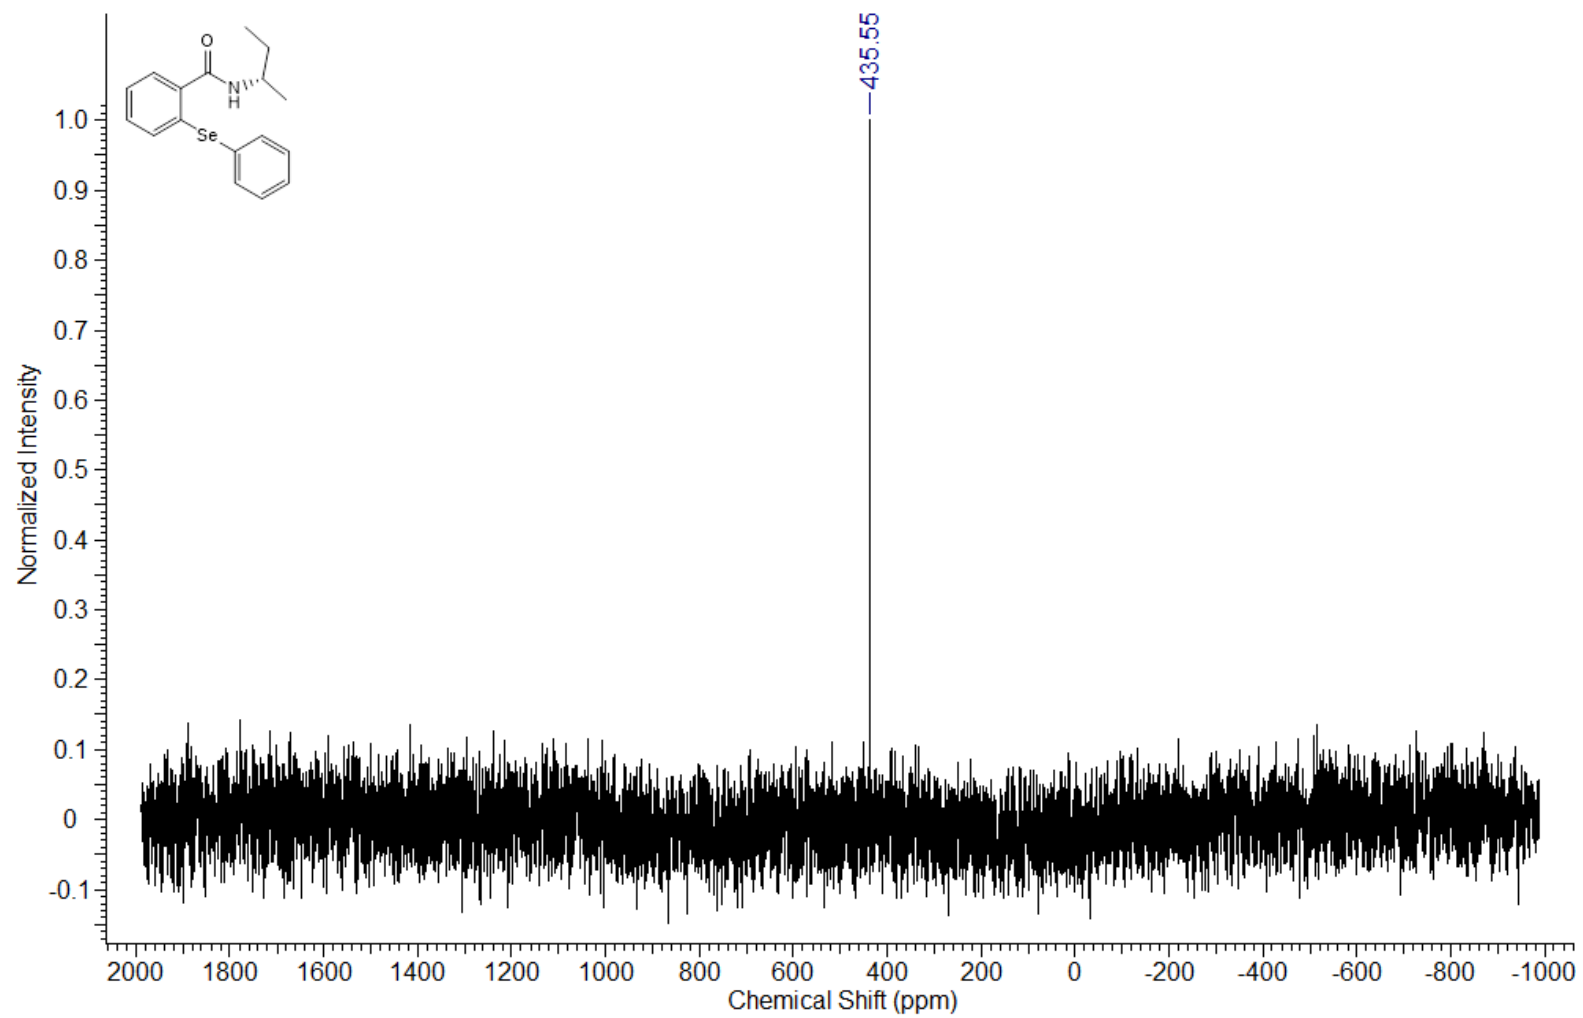

*<sup>77</sup>Se NMR spectra*

*N*-(*R*)-(-)-*sec*-butyl-2-(phenylselanyl)benzamide **7**

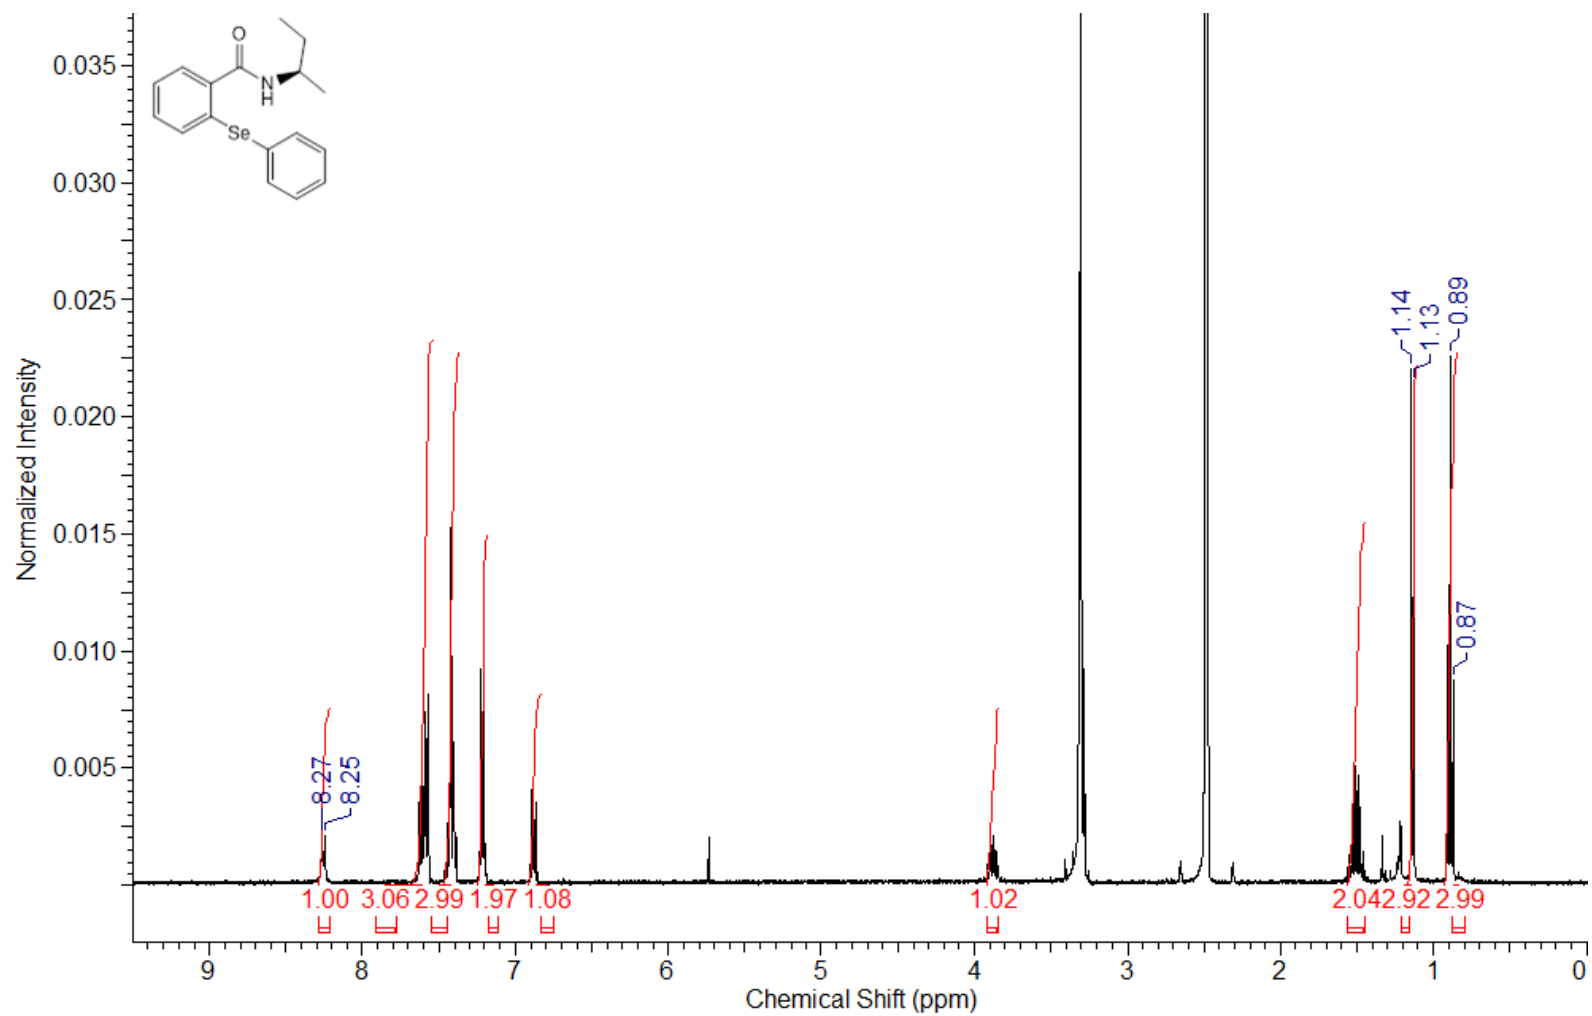

<sup>1</sup>H NMR spectra

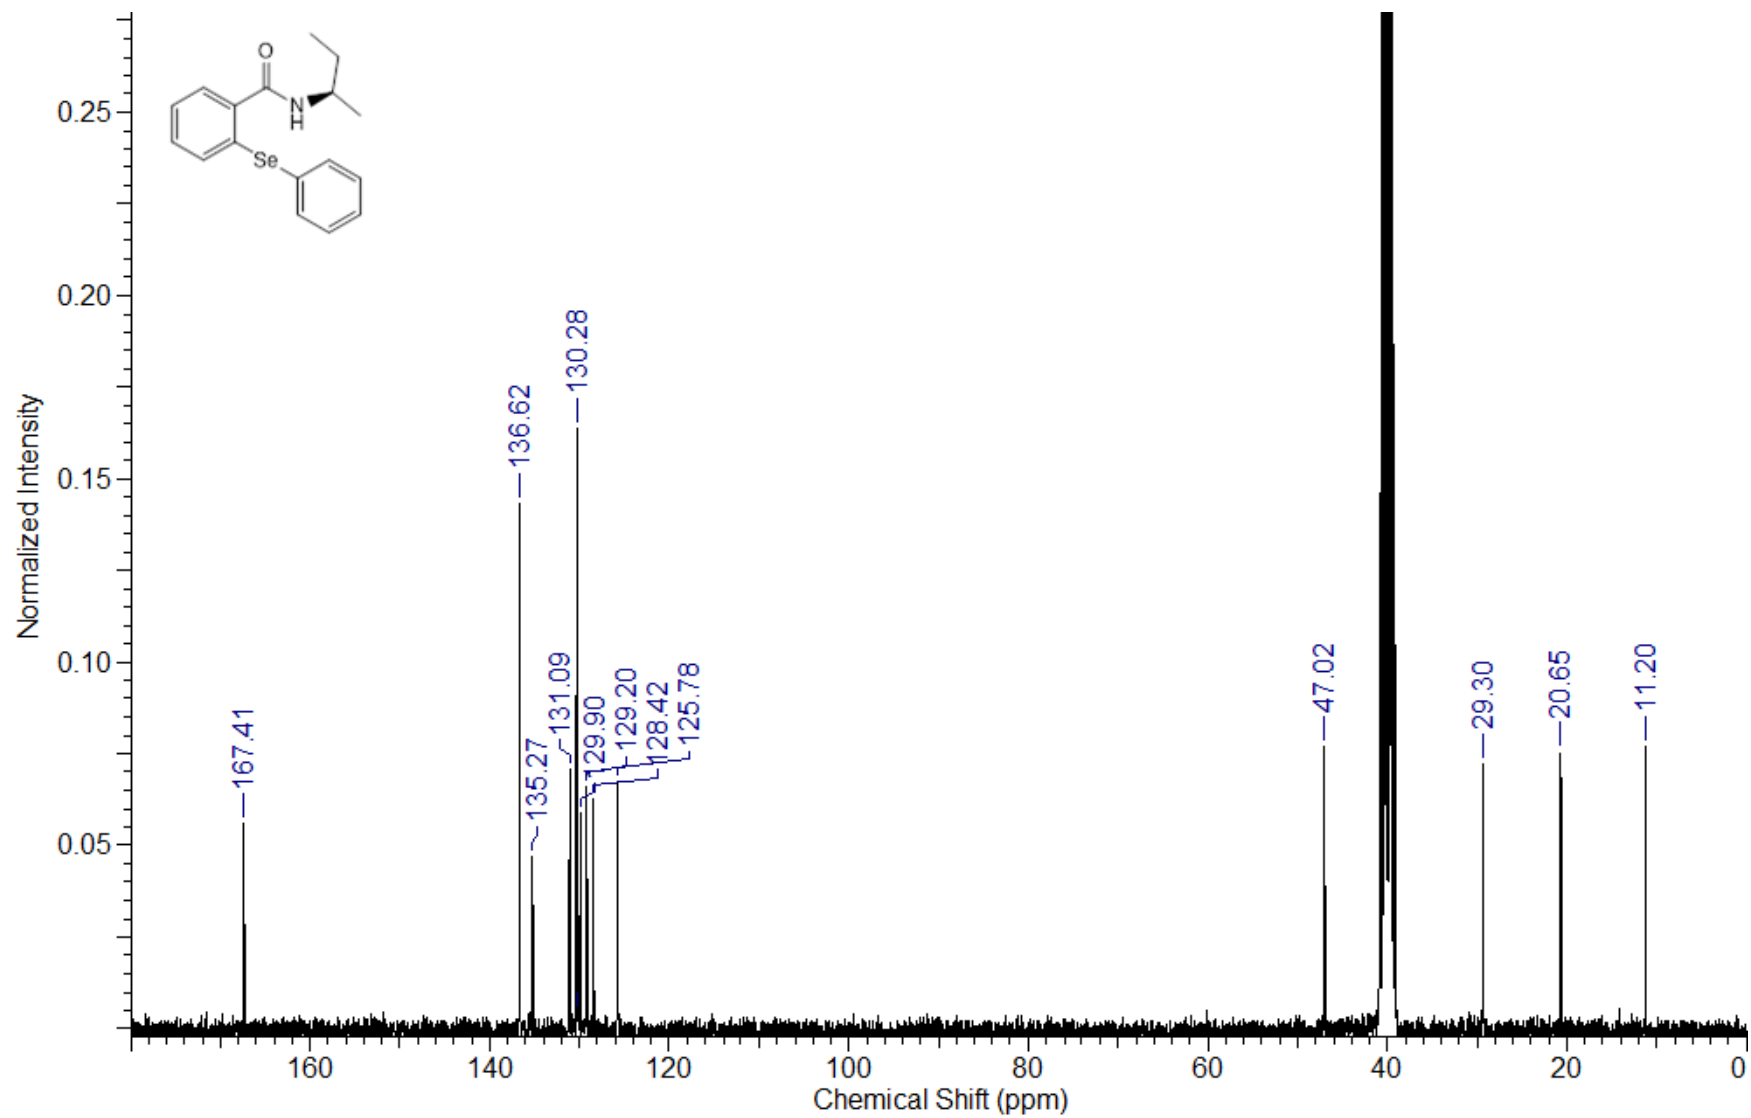

<sup>13</sup>C NMR spectra

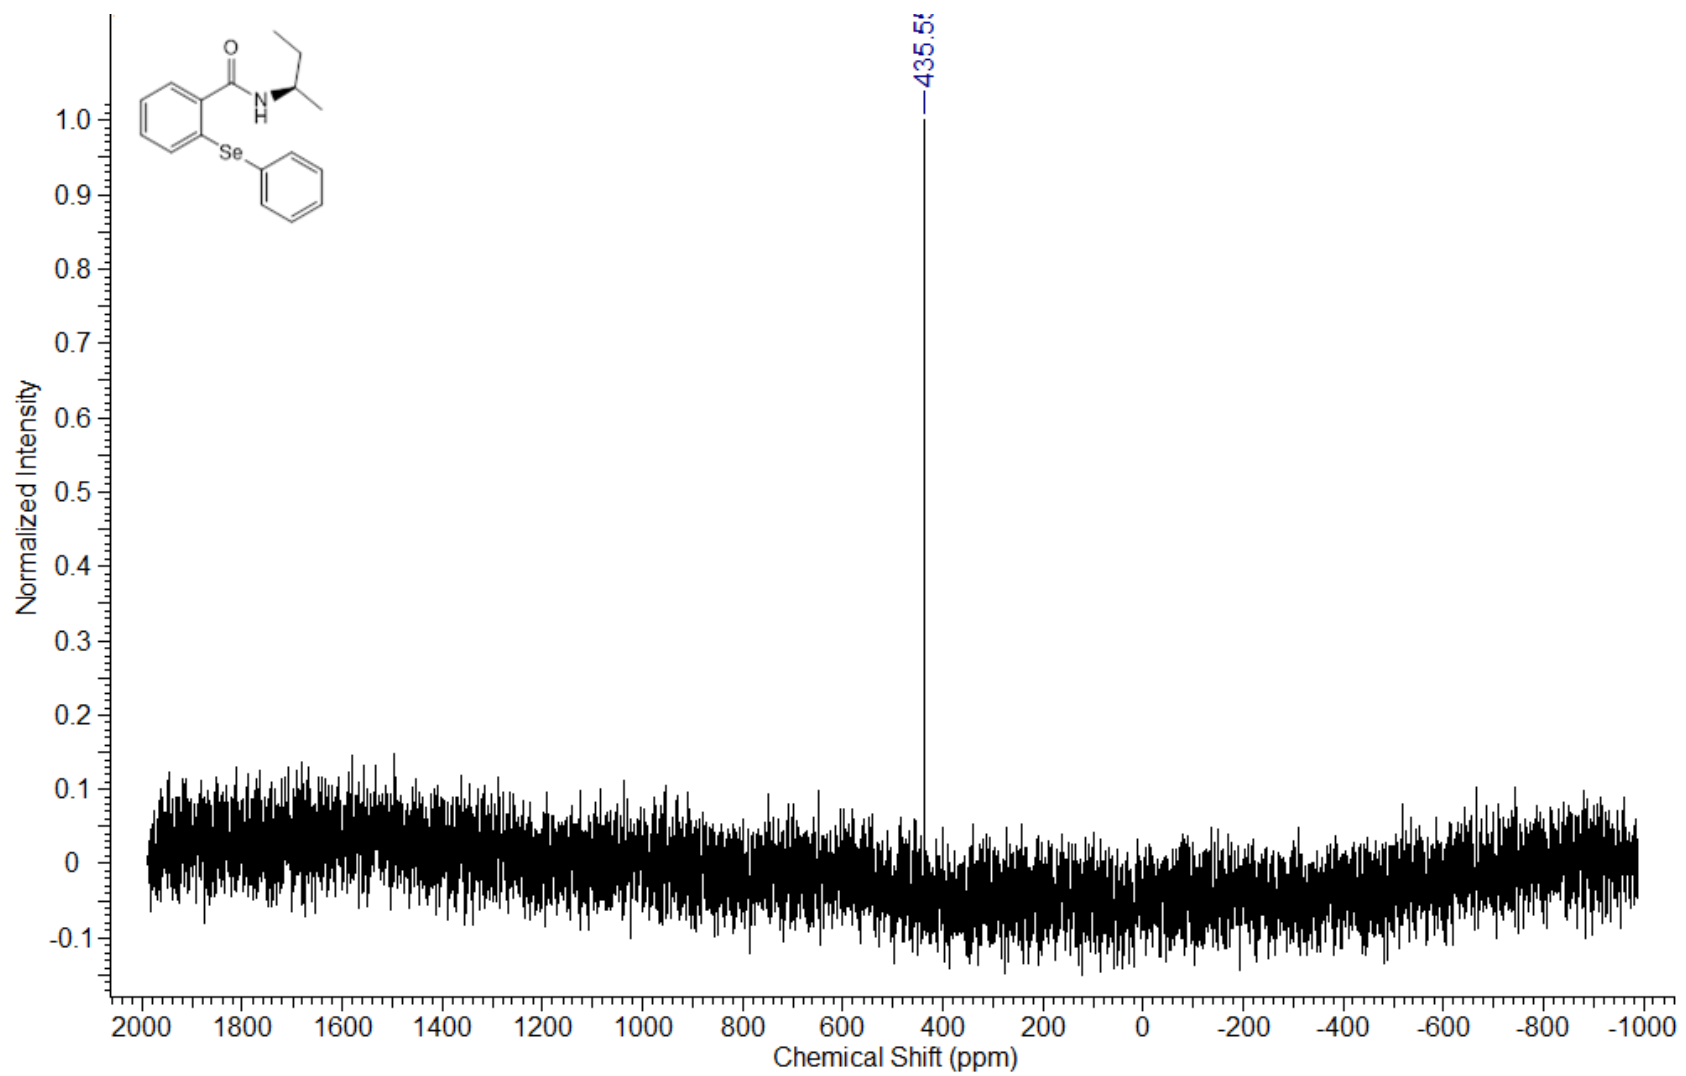

$^{77}\text{Se}$  NMR spectra

*N*-(*R*)-(-)-1-hydroxy-2-butanyl-2-(phenylselanyl)benzamide **8**

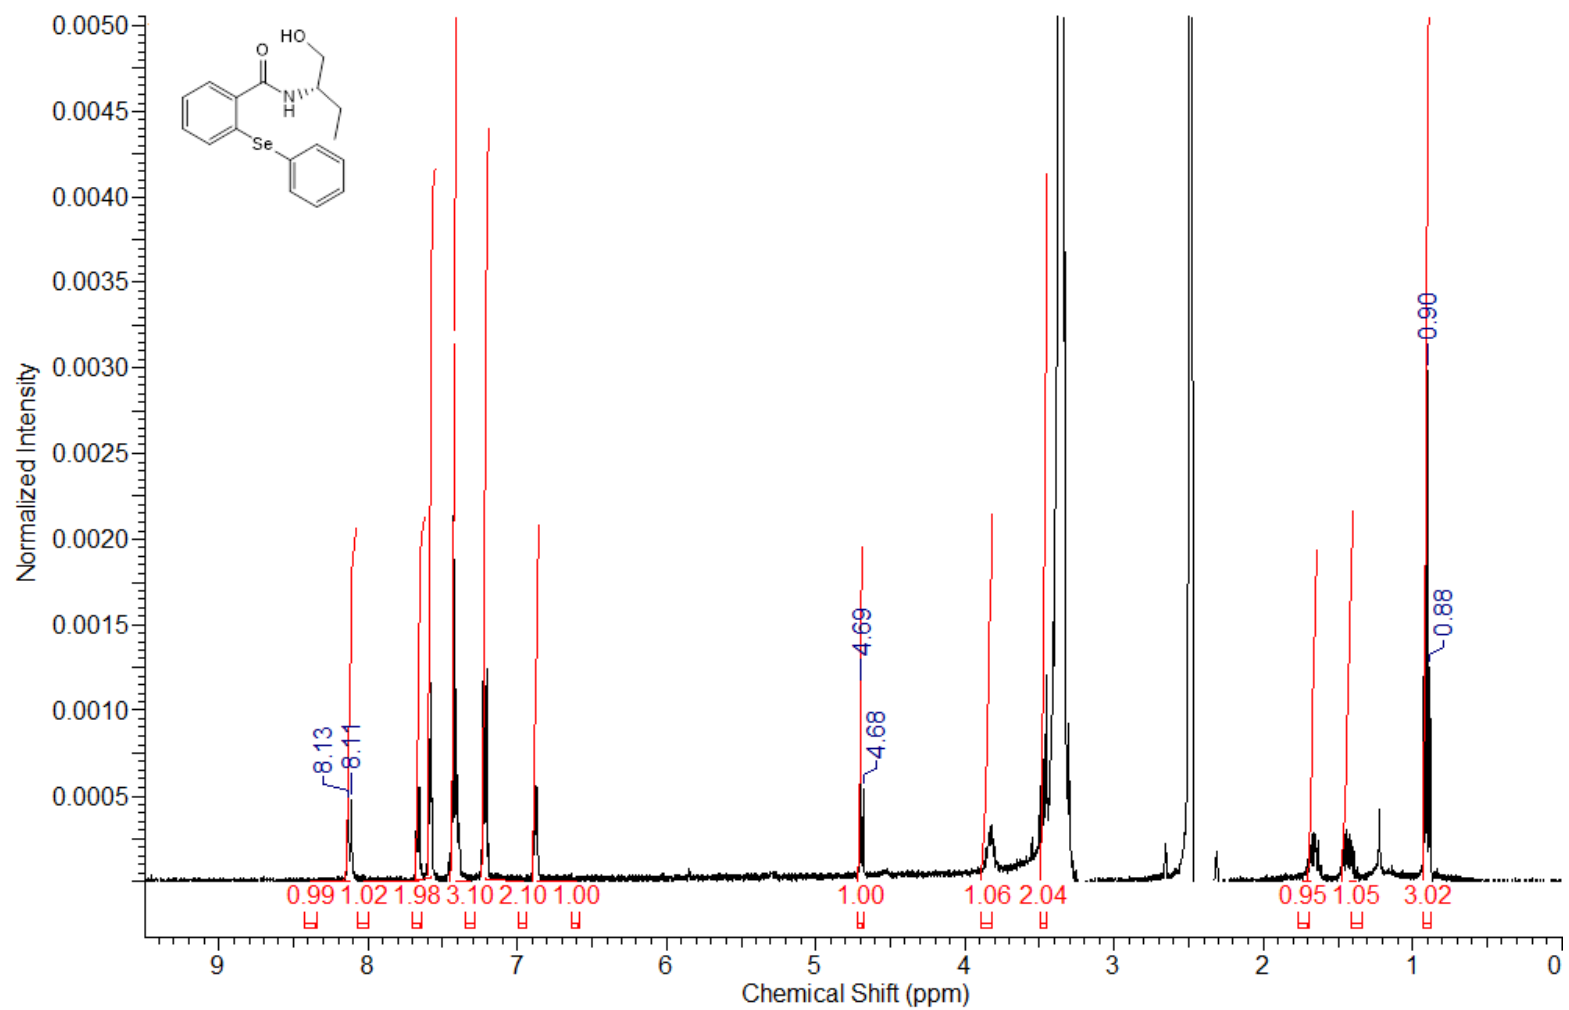

<sup>1</sup>H NMR spectra

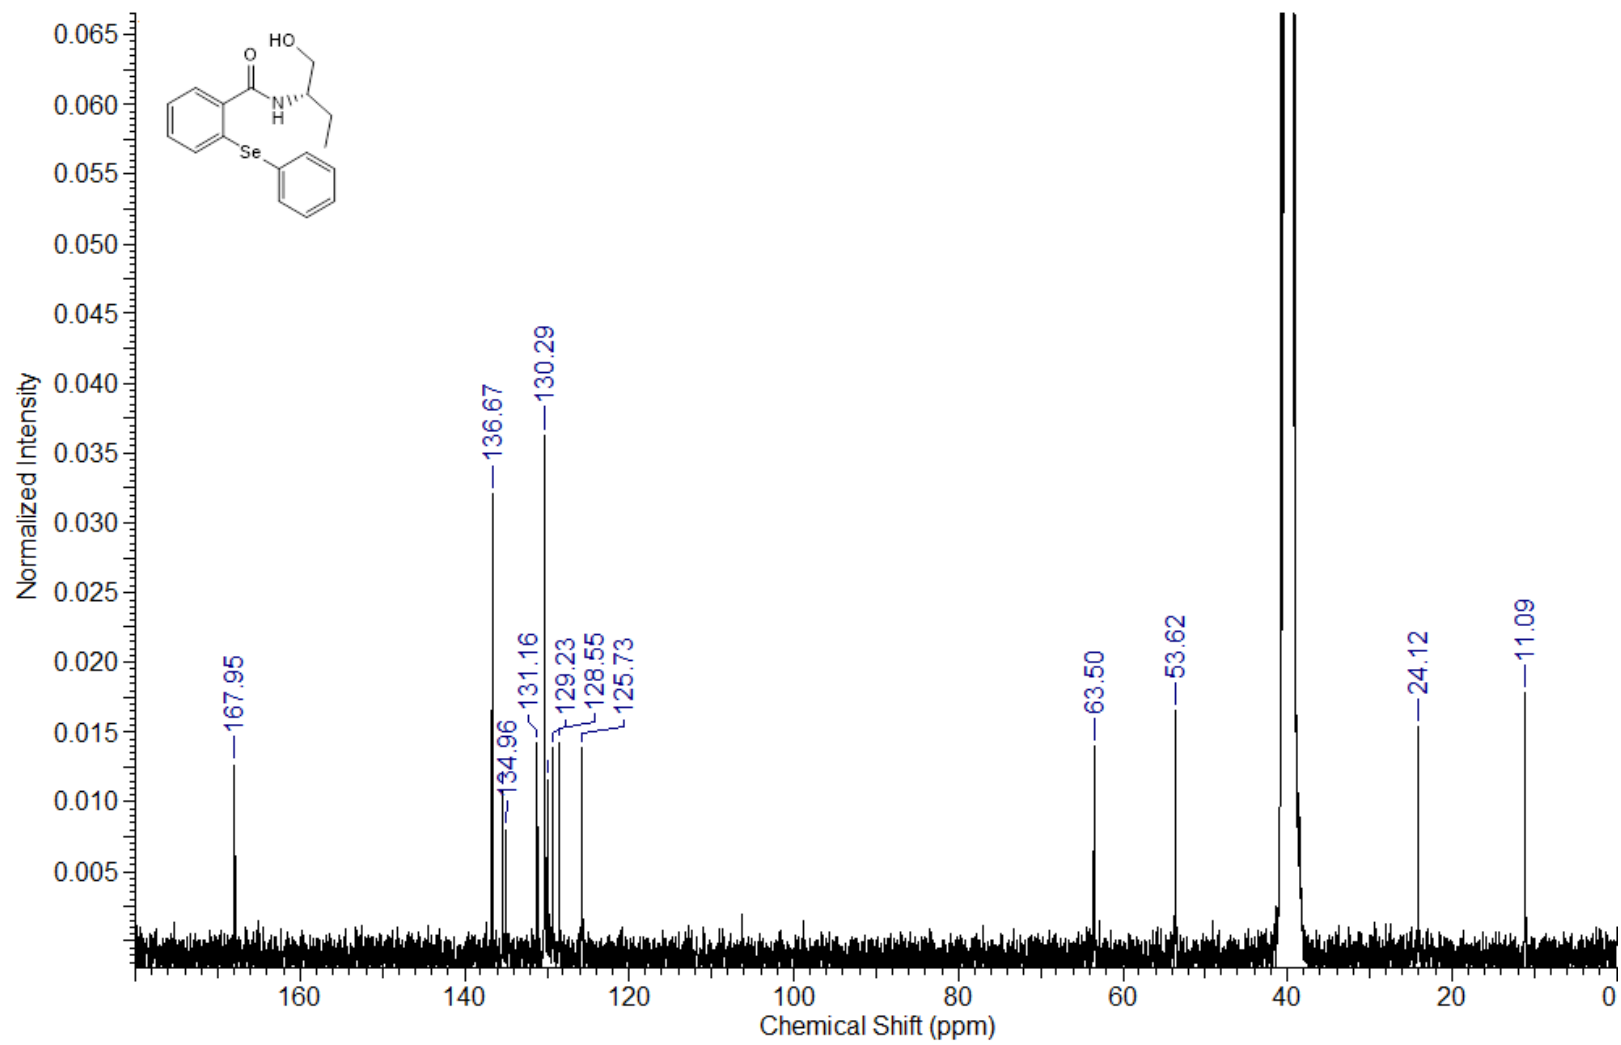

<sup>13</sup>C NMR spectra

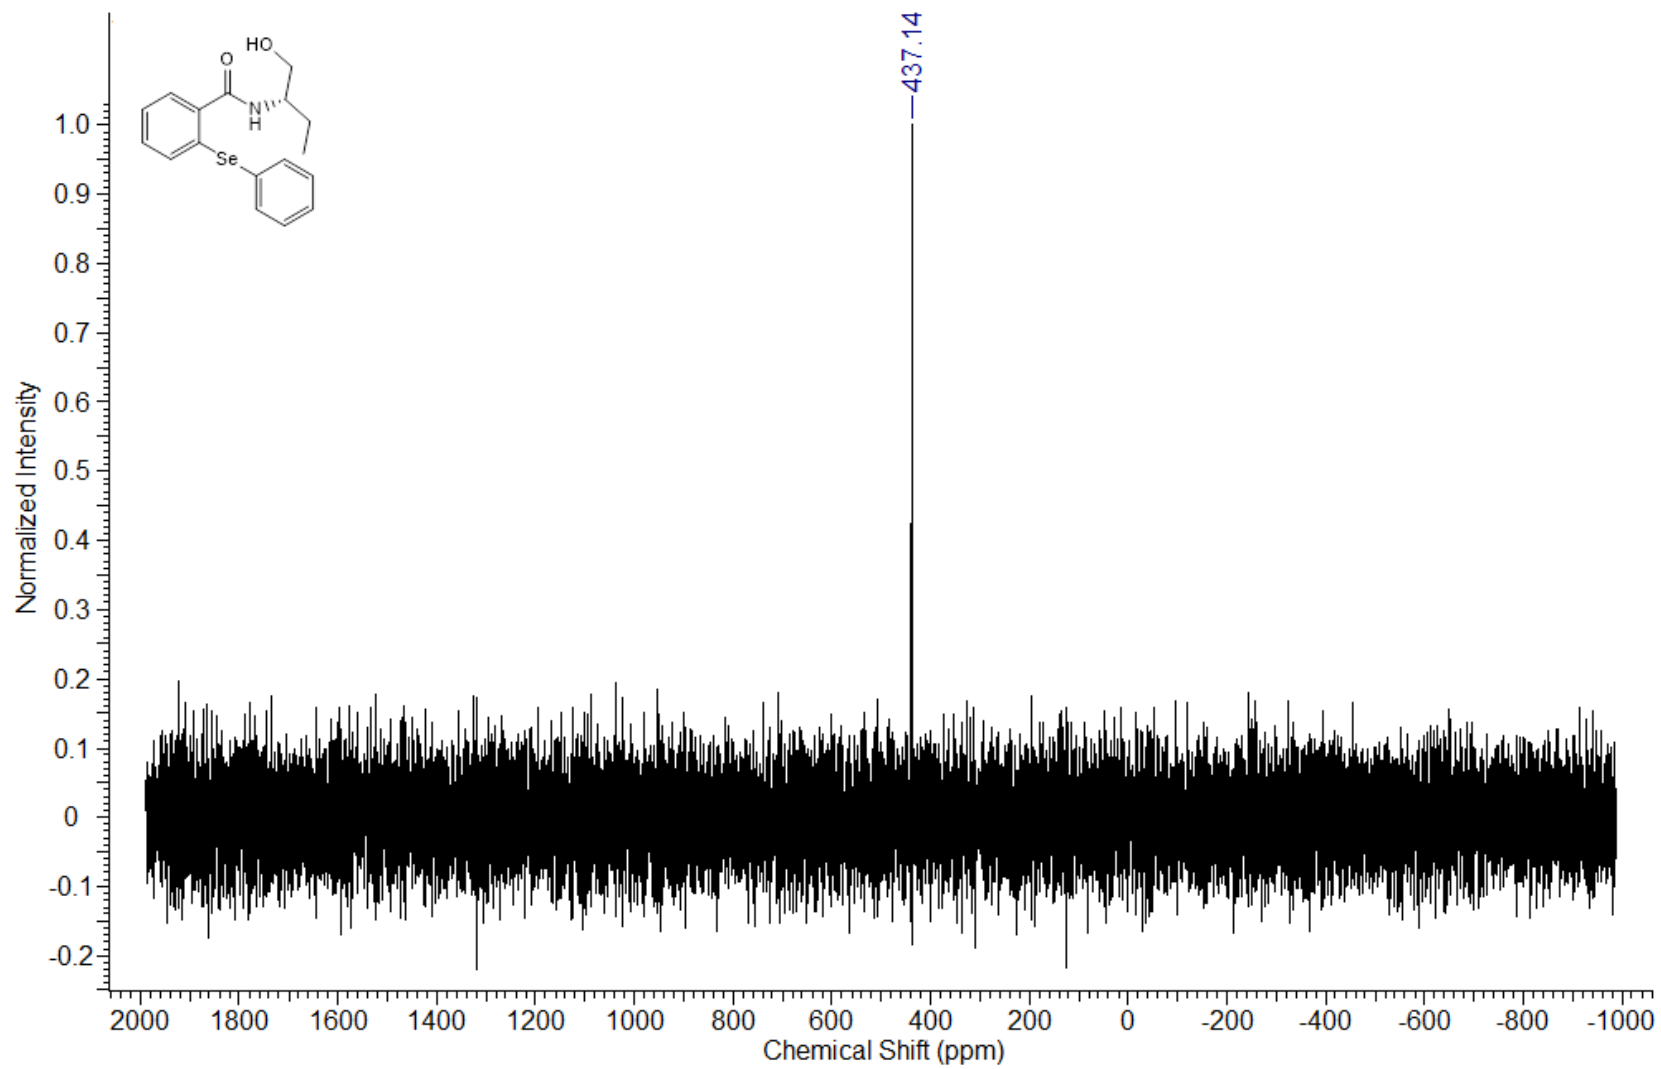

*<sup>77</sup>Se NMR spectra*



*N*-(*S*)-(+)-1-hydroksy-2-butanyl-2-(phenylselanyl)benzamide **9**

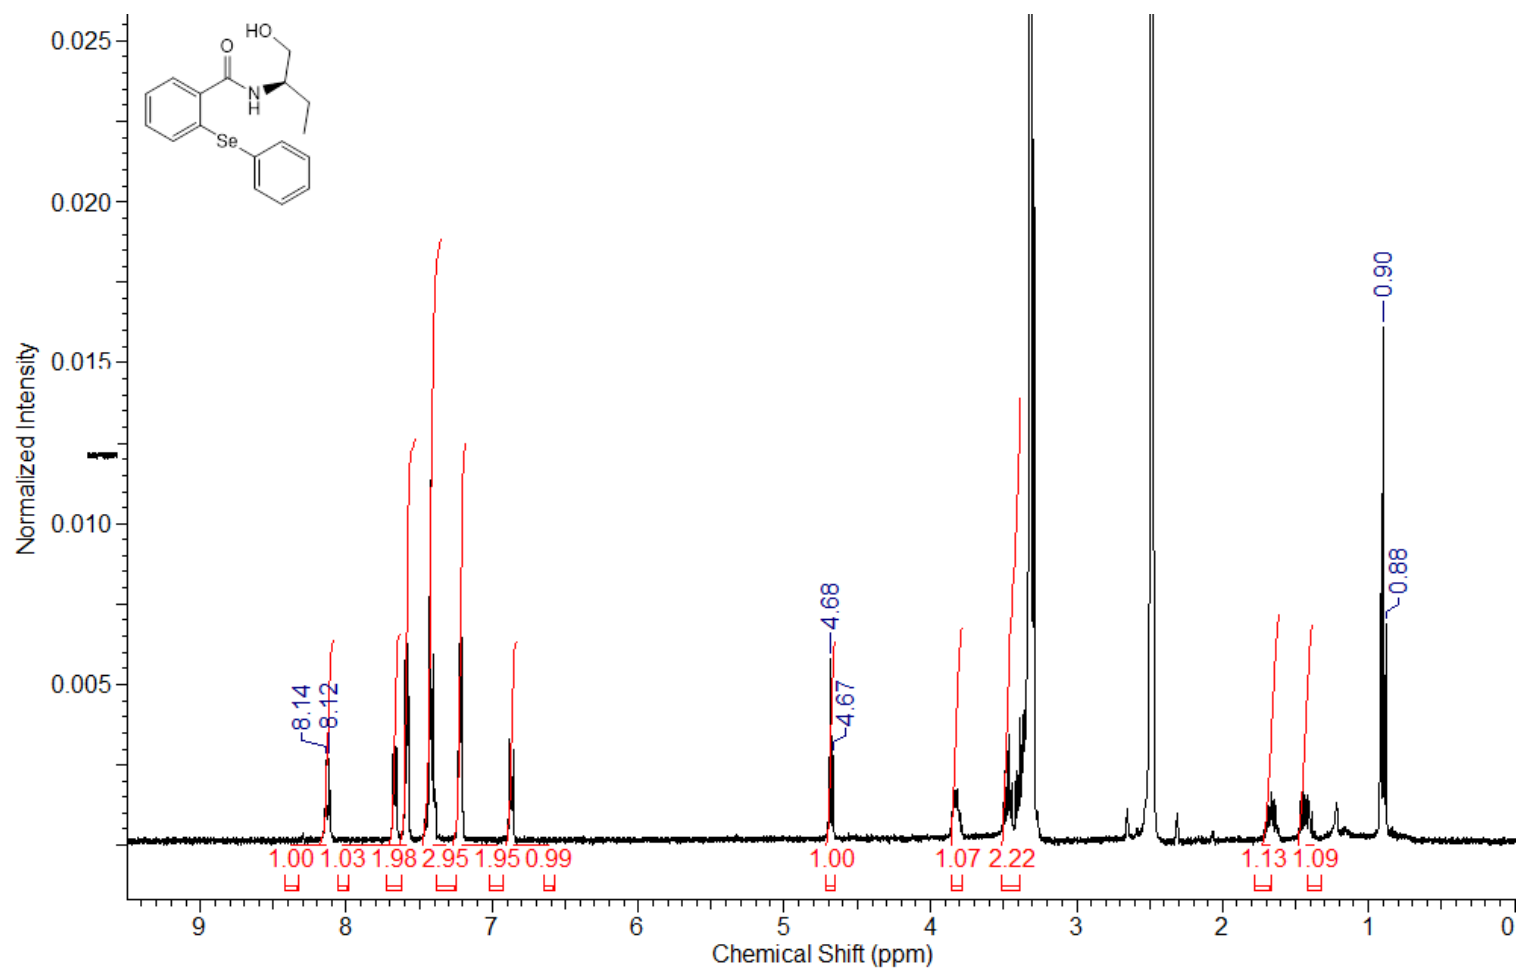

<sup>1</sup>H NMR spectra

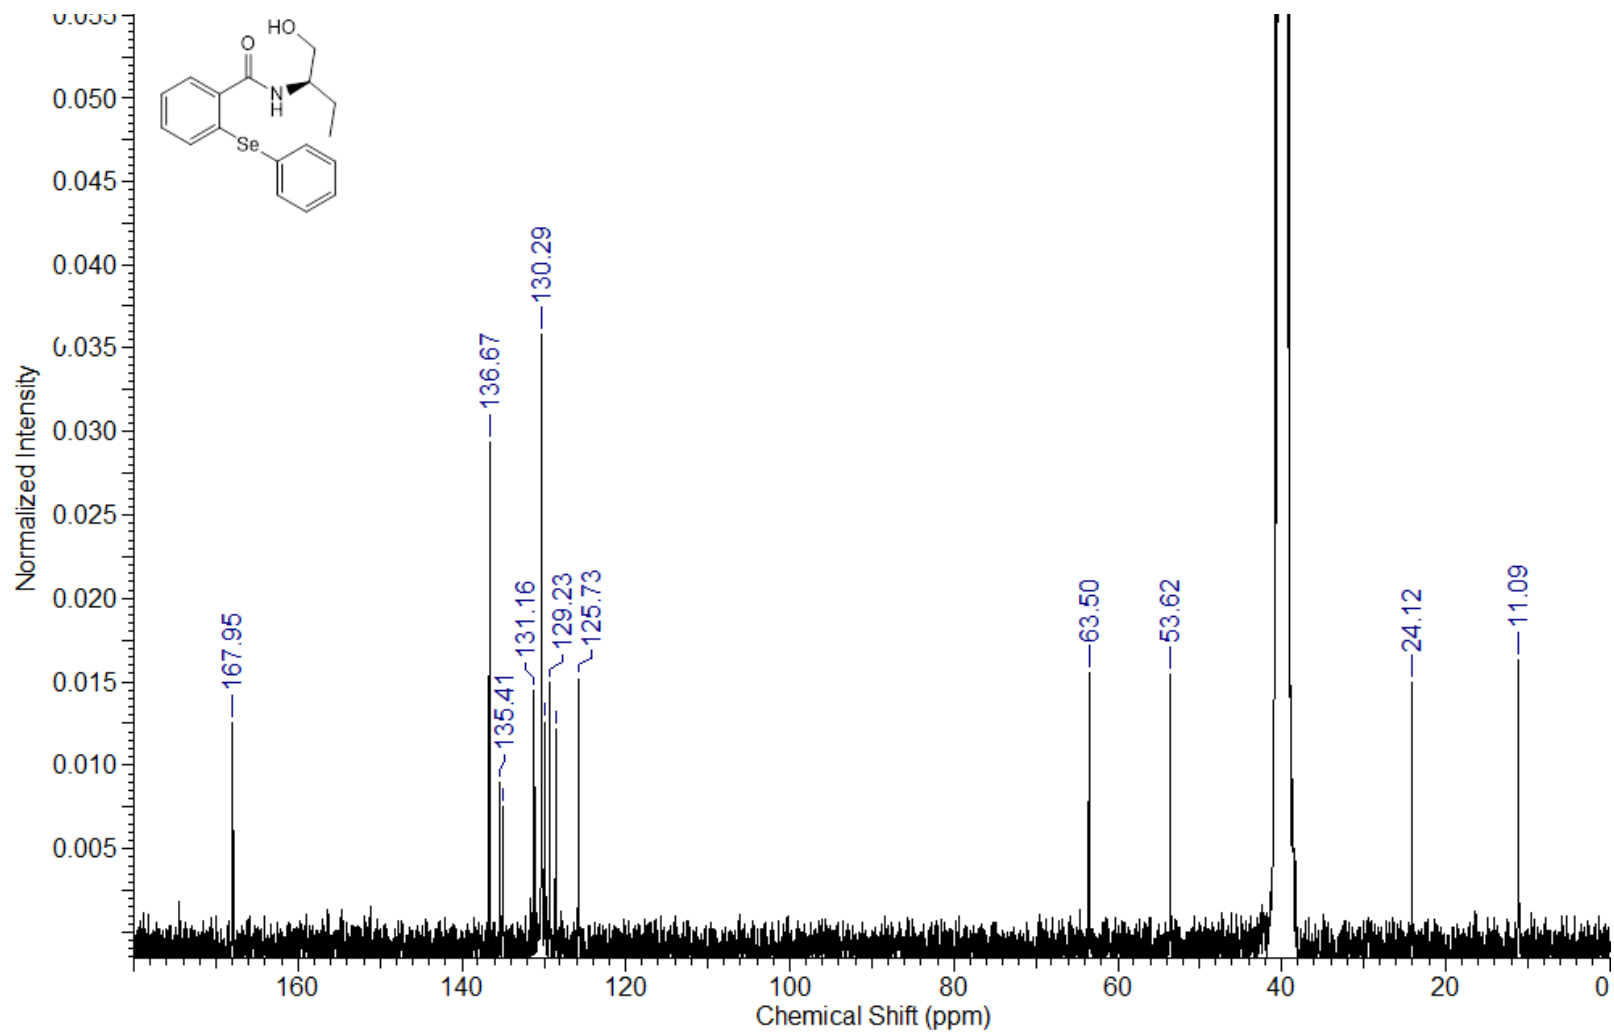

$^{13}\text{C}$  NMR spectra

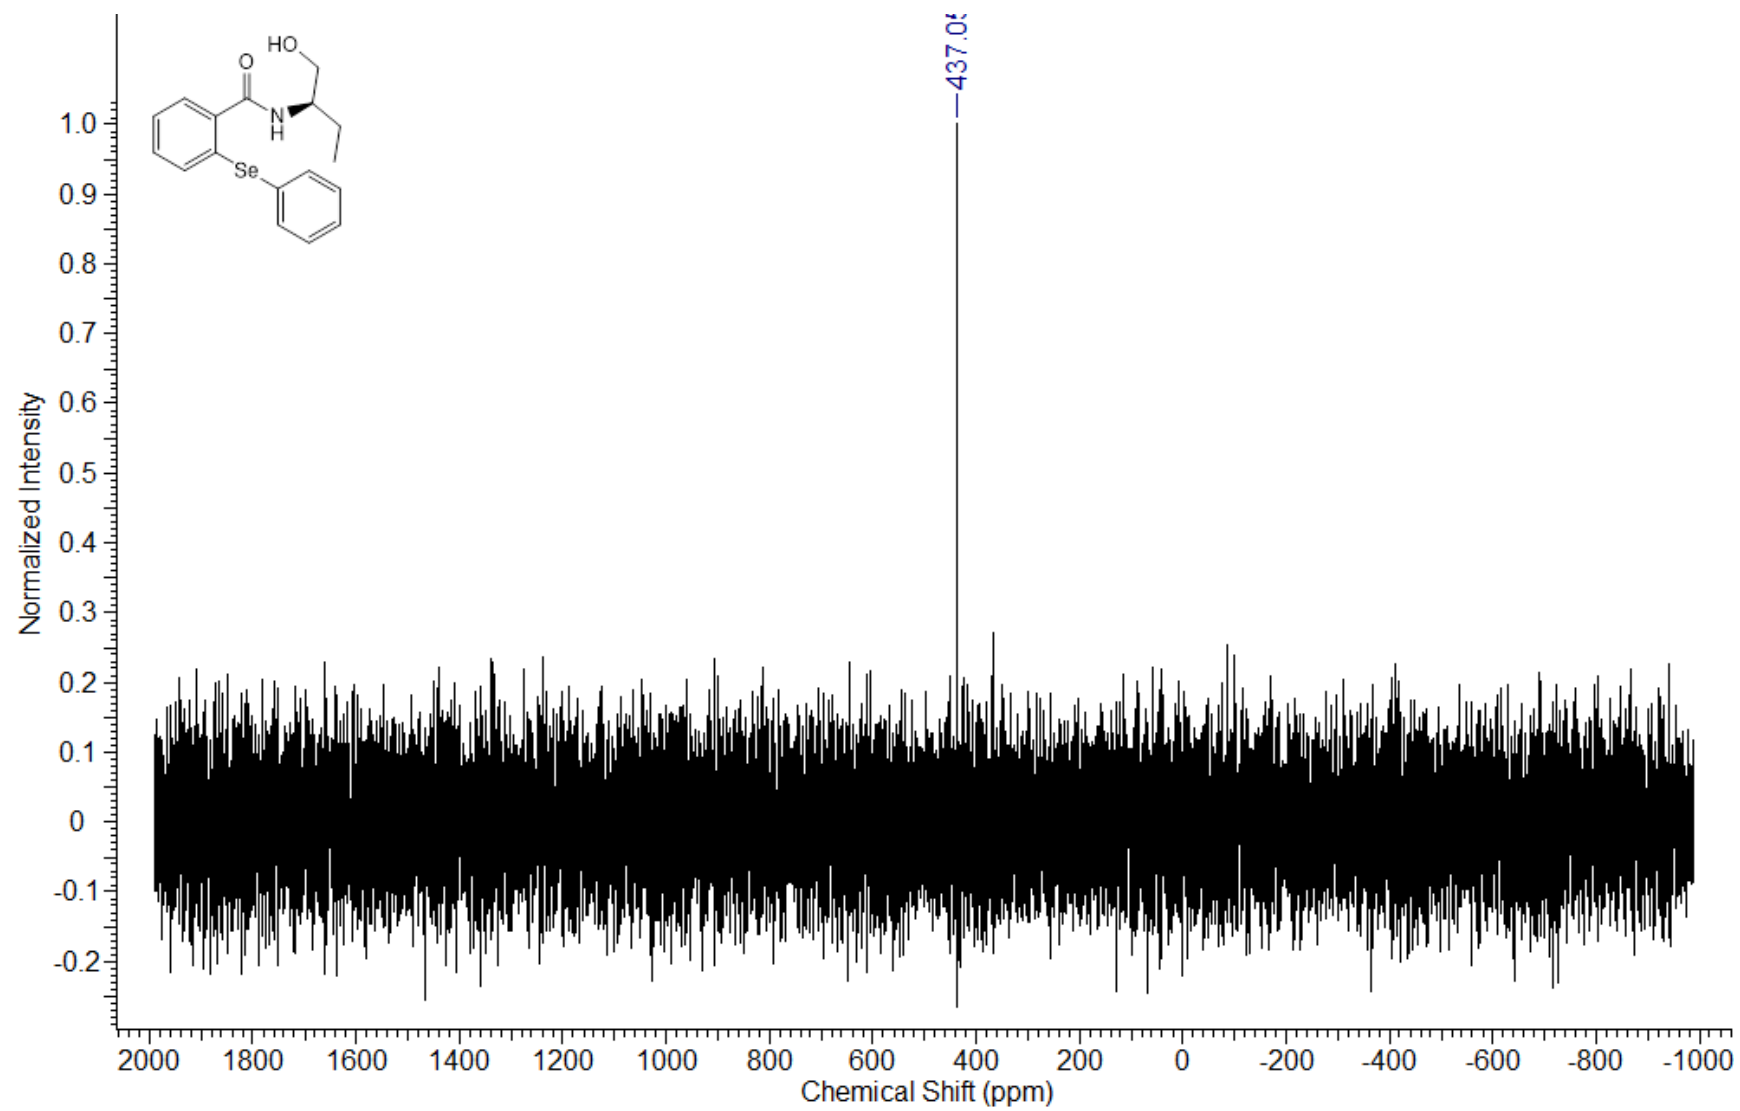

$^{77}\text{Se}$  NMR spectra

*N*-(*R*)-(-)-1,2,3,4-tetrahydro-1-naphthyl-2-(phenylselanyl)benzamide **10**

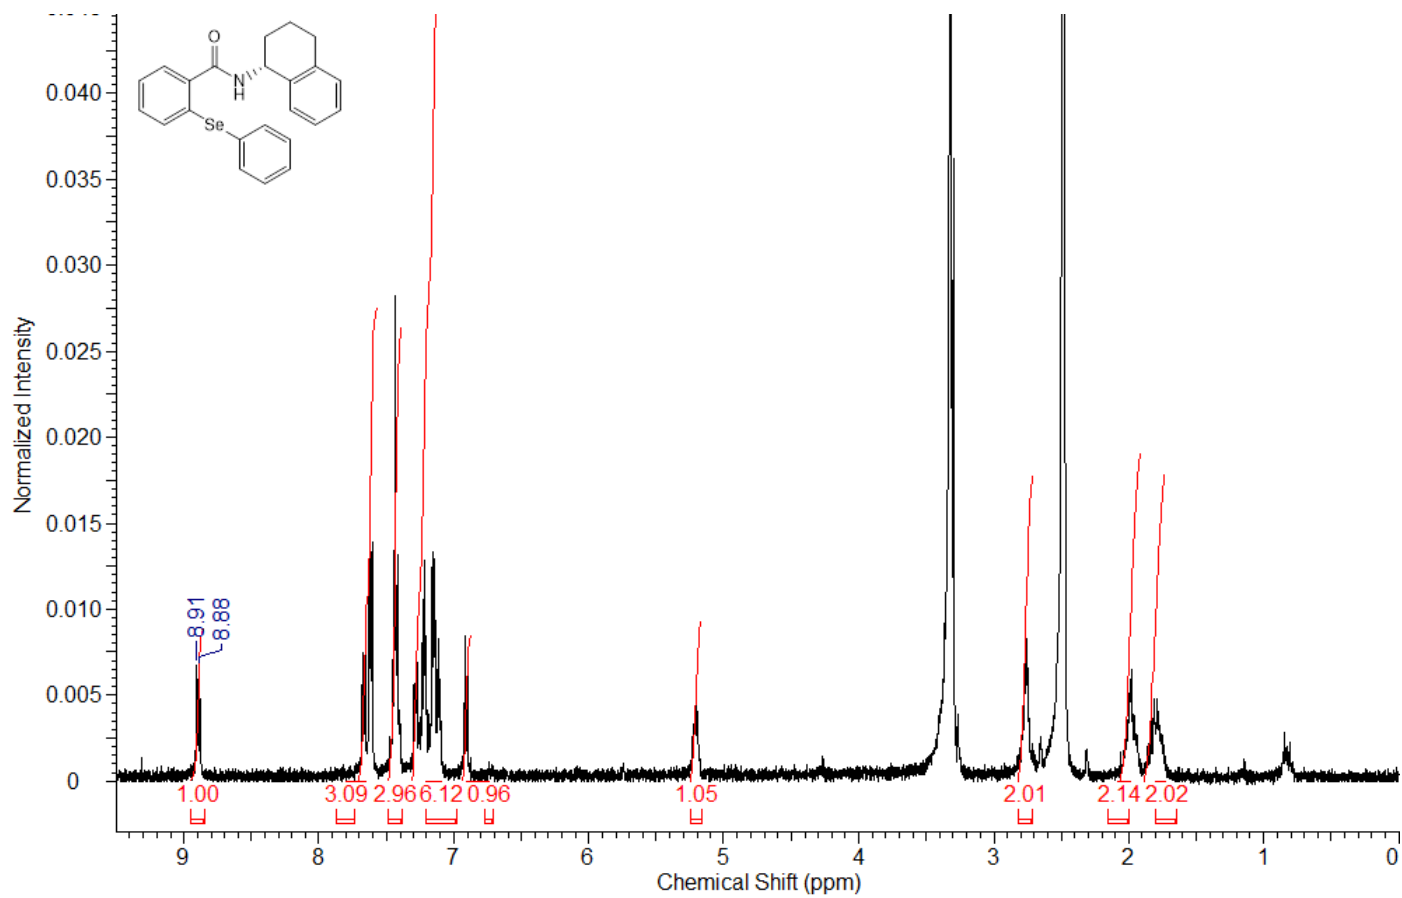

<sup>1</sup>H NMR spectra

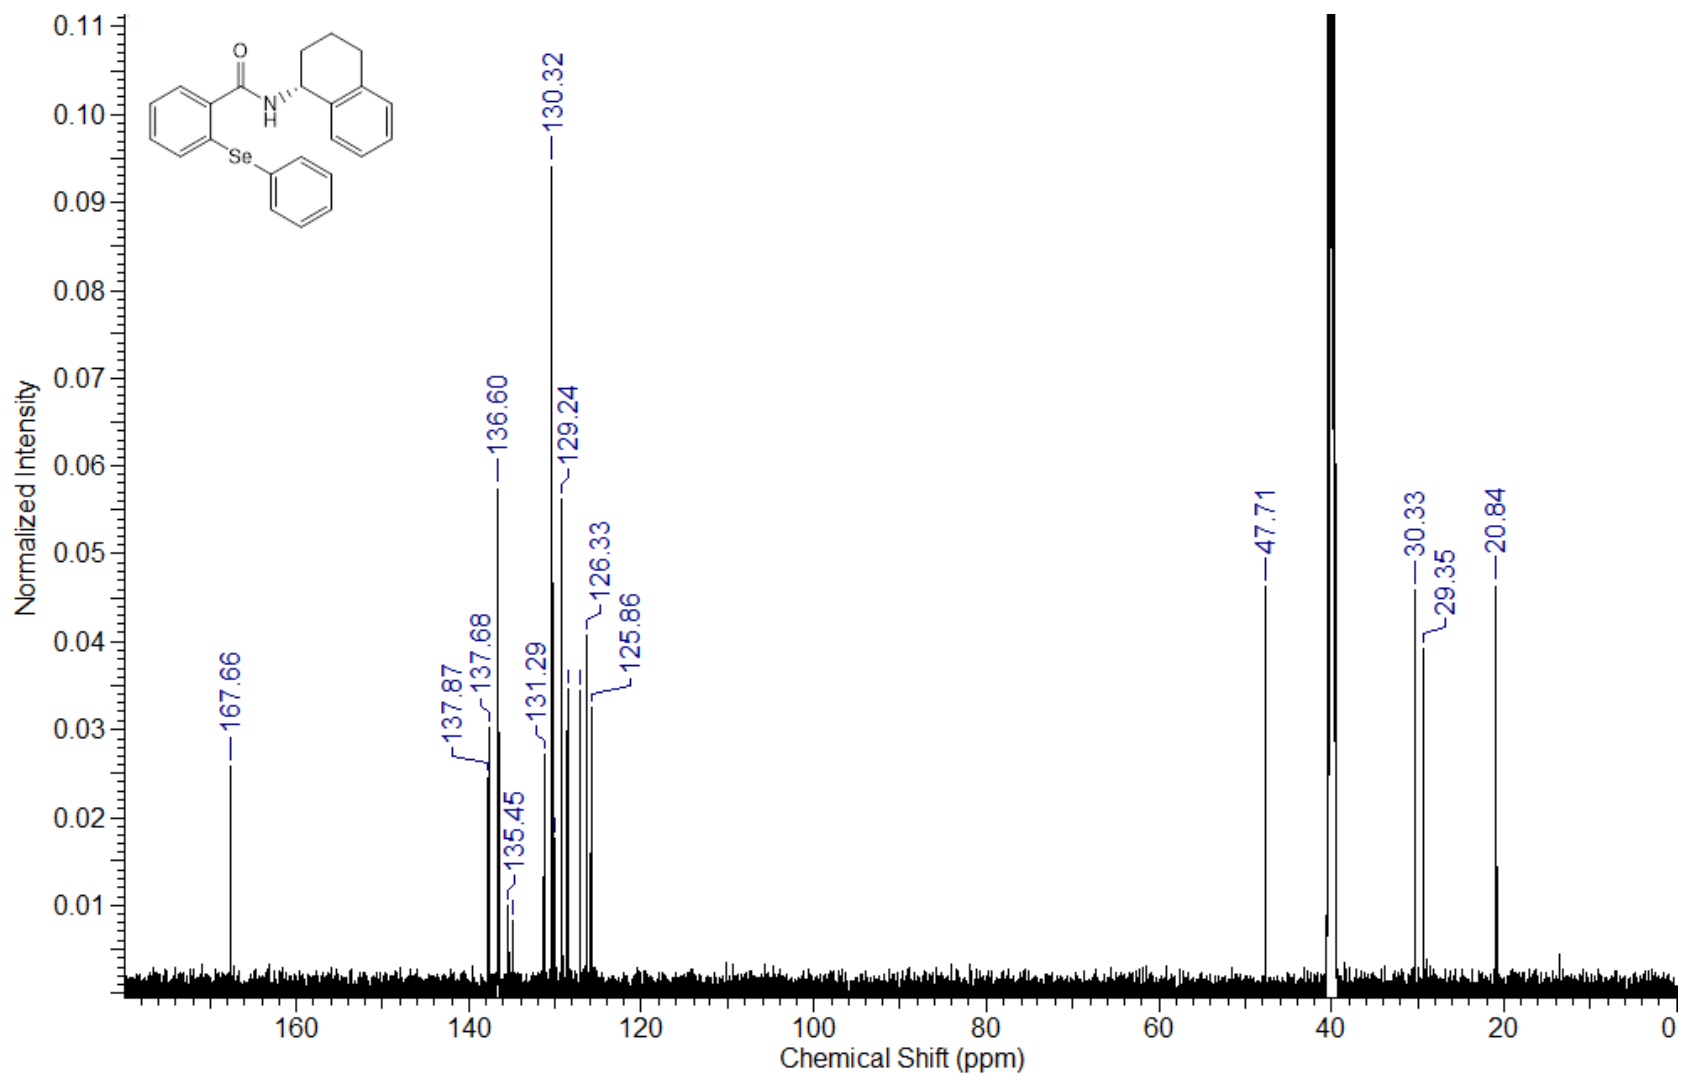

$^{13}\text{C}$  NMR spectra

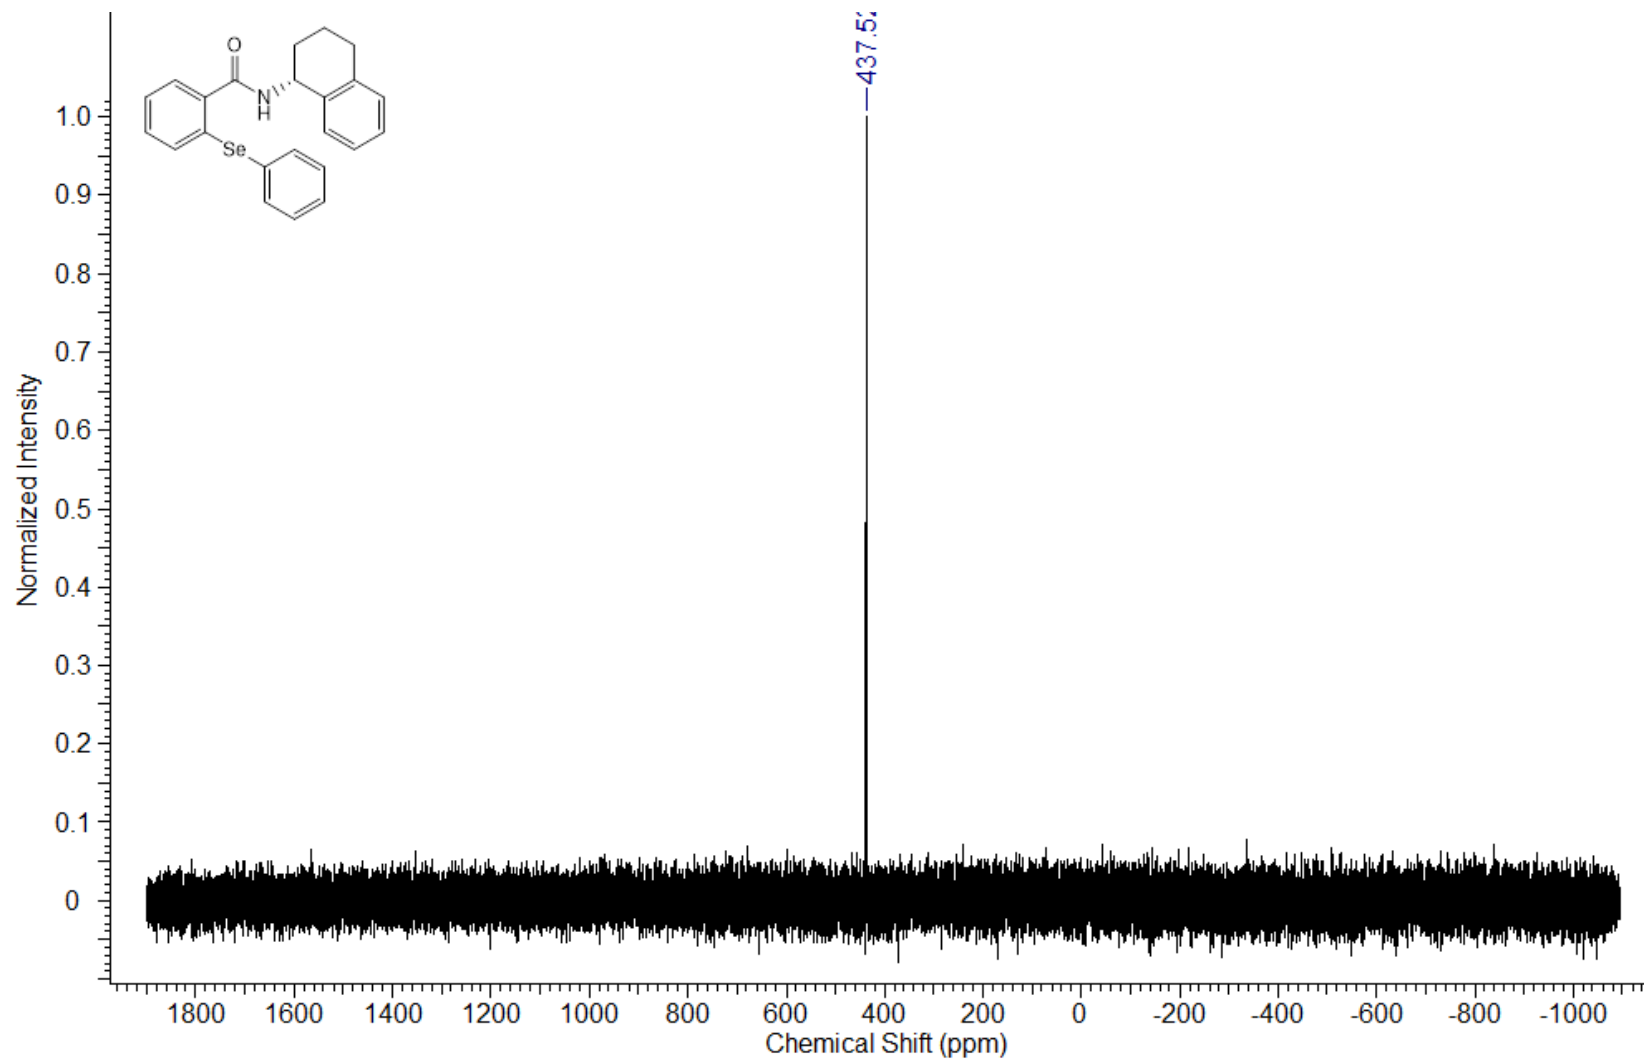

$^{77}\text{Se}$  NMR spectra

*N*-(*S*)-(+)-1,2,3,4-tetrahydro-1-naphyl-2-(phenylselanyl)benzamide **11**

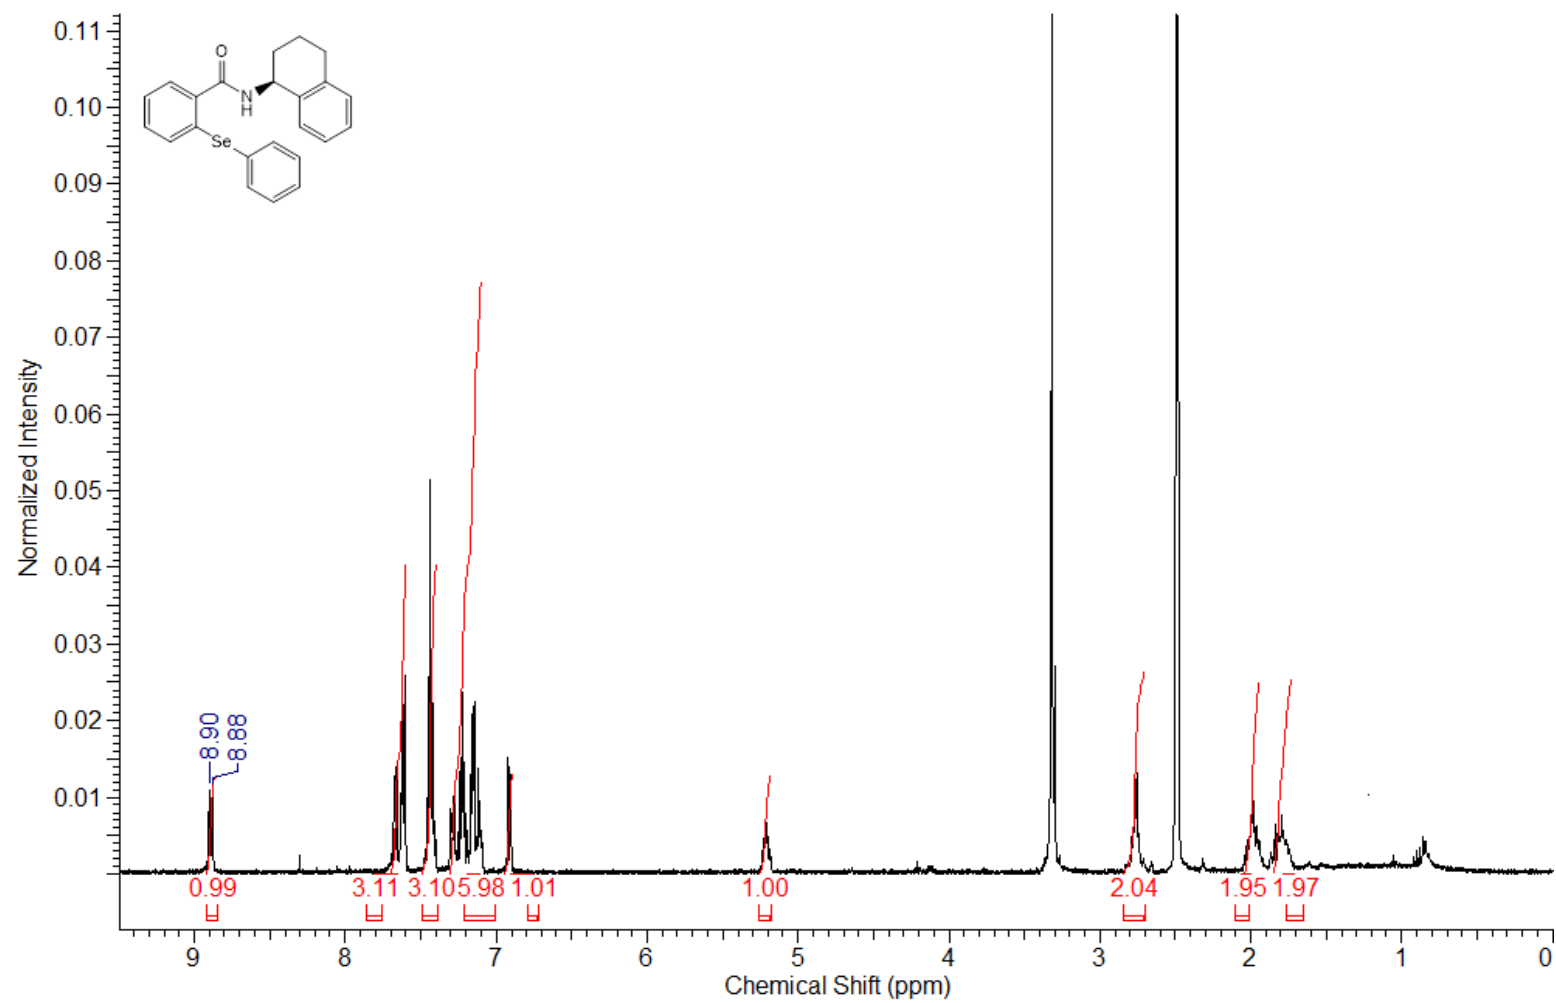

<sup>1</sup>H NMR spectra

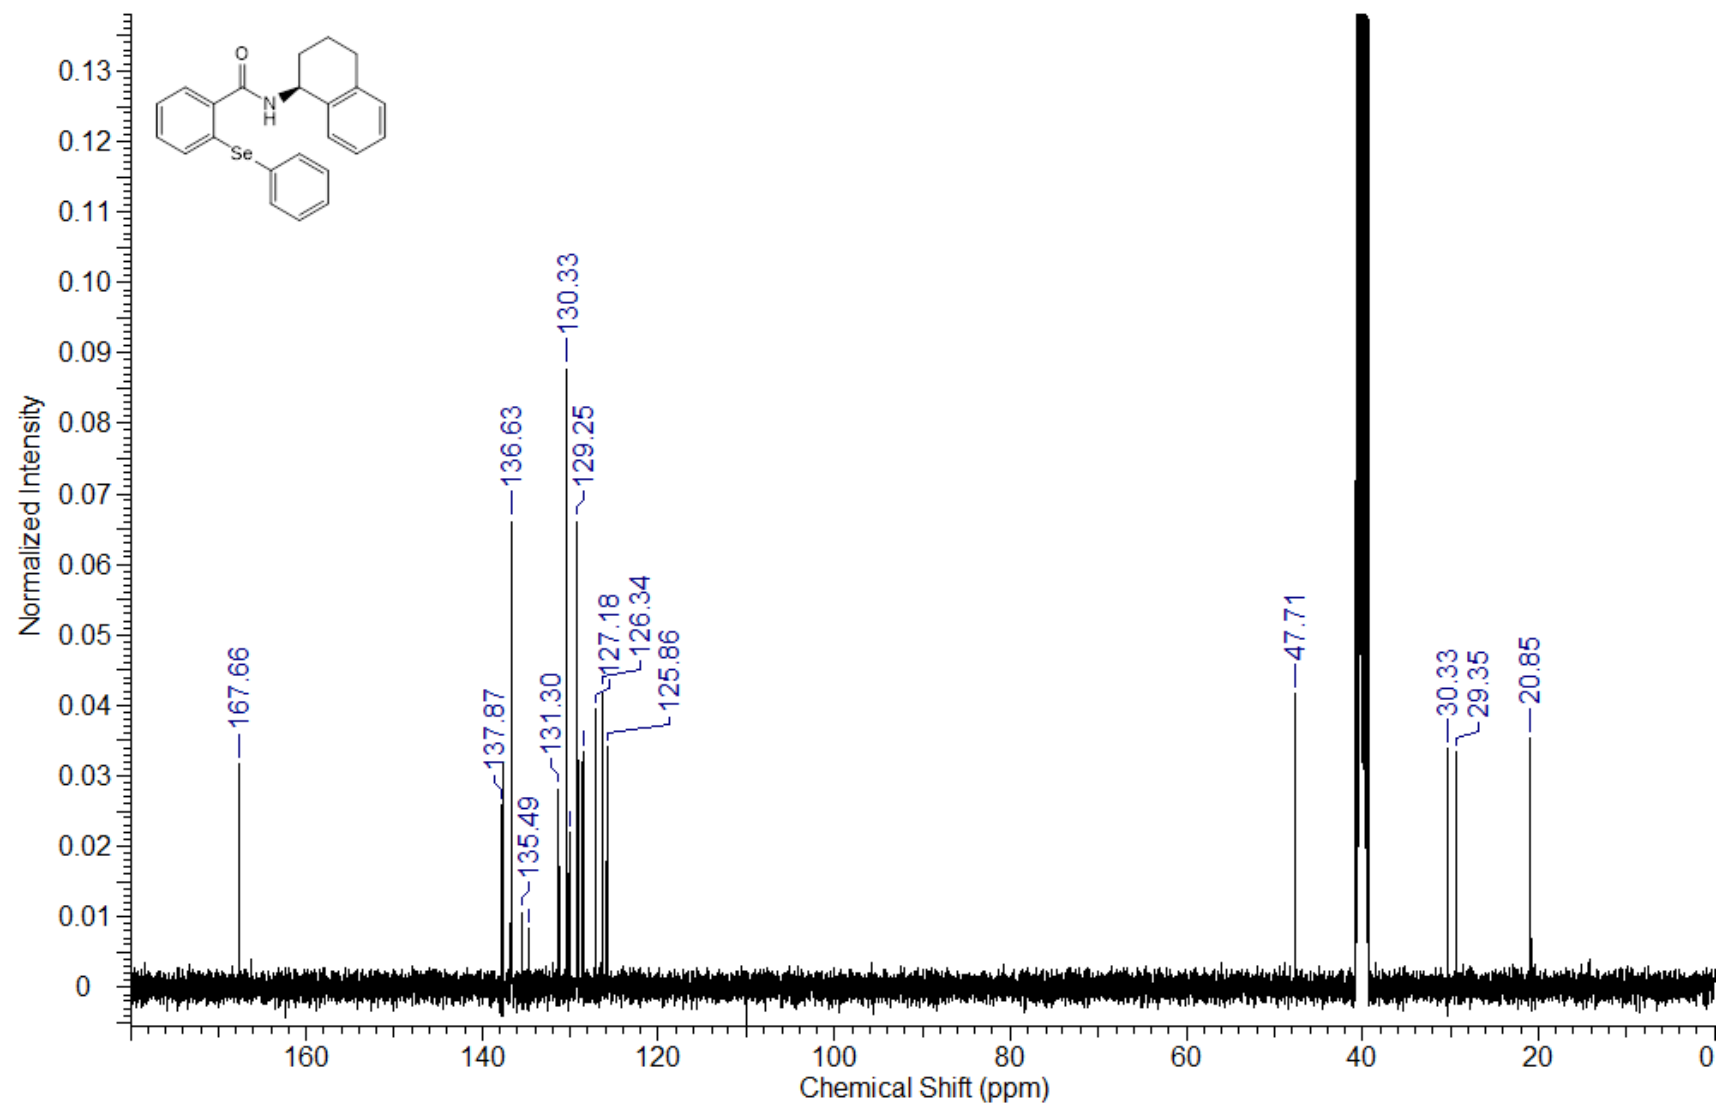

<sup>13</sup>C NMR spectra



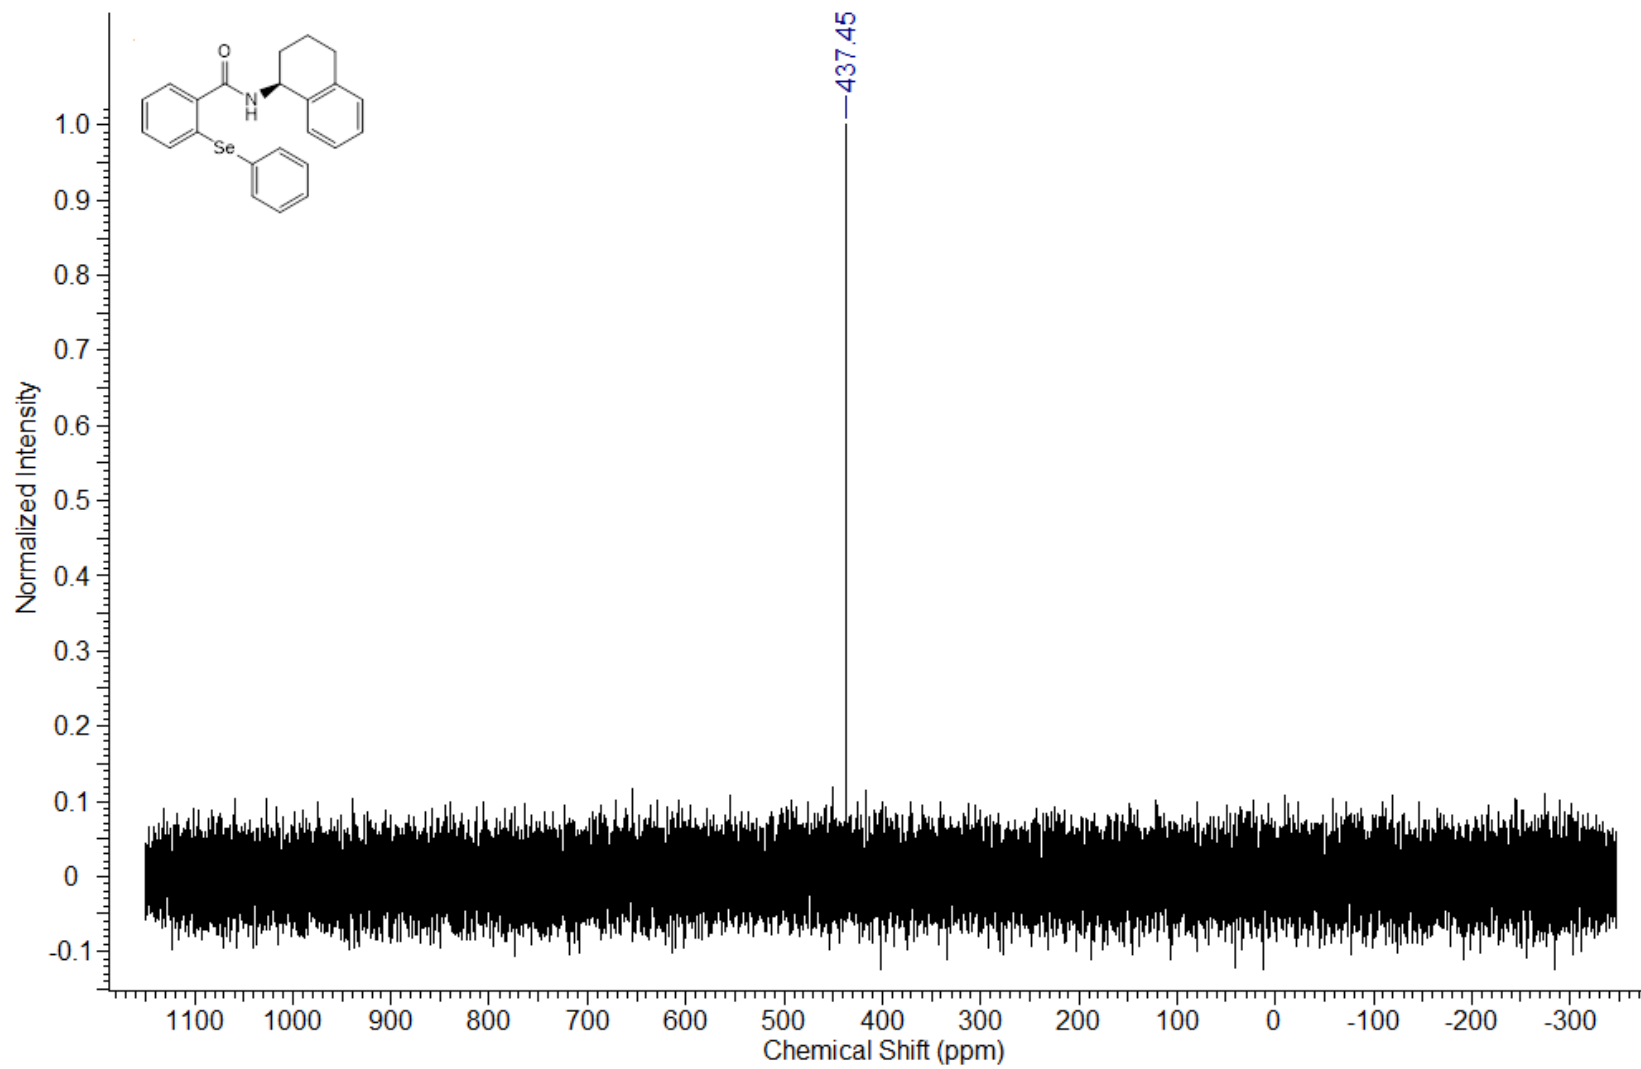

$^{77}\text{Se}$  NMR spectra

N-(R)-(+)- $\alpha$ -methylbenzyl- 2-(phenylselanyl)benzamide **12**

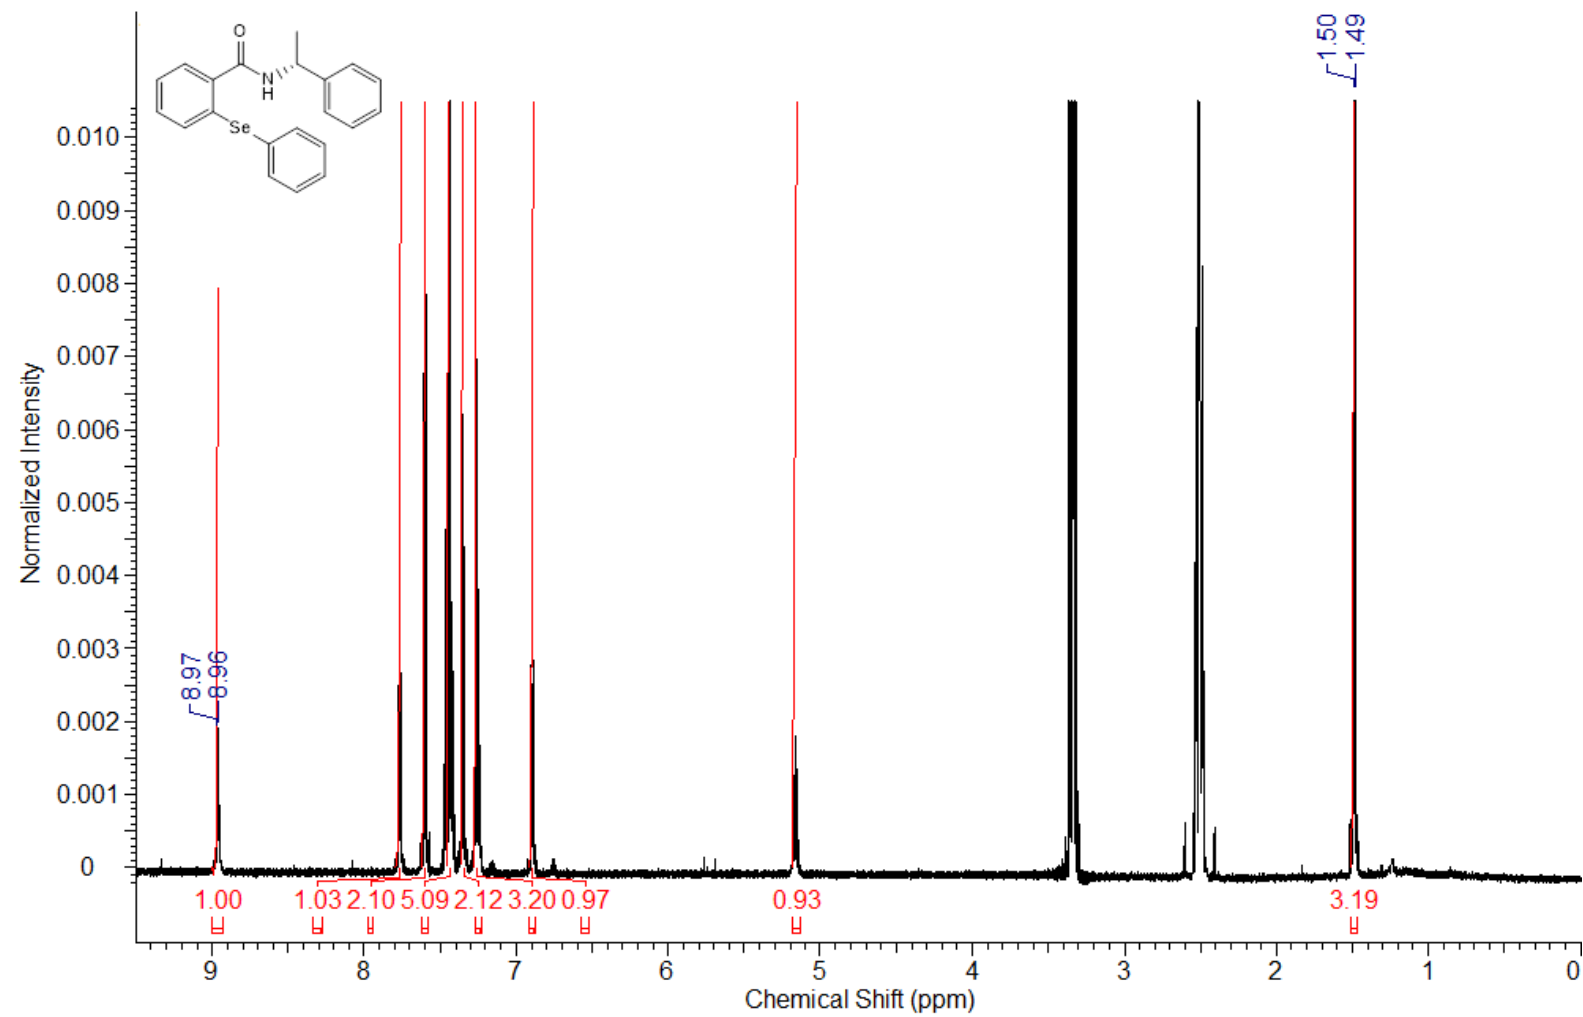

$^1\text{H}$  NMR spectra

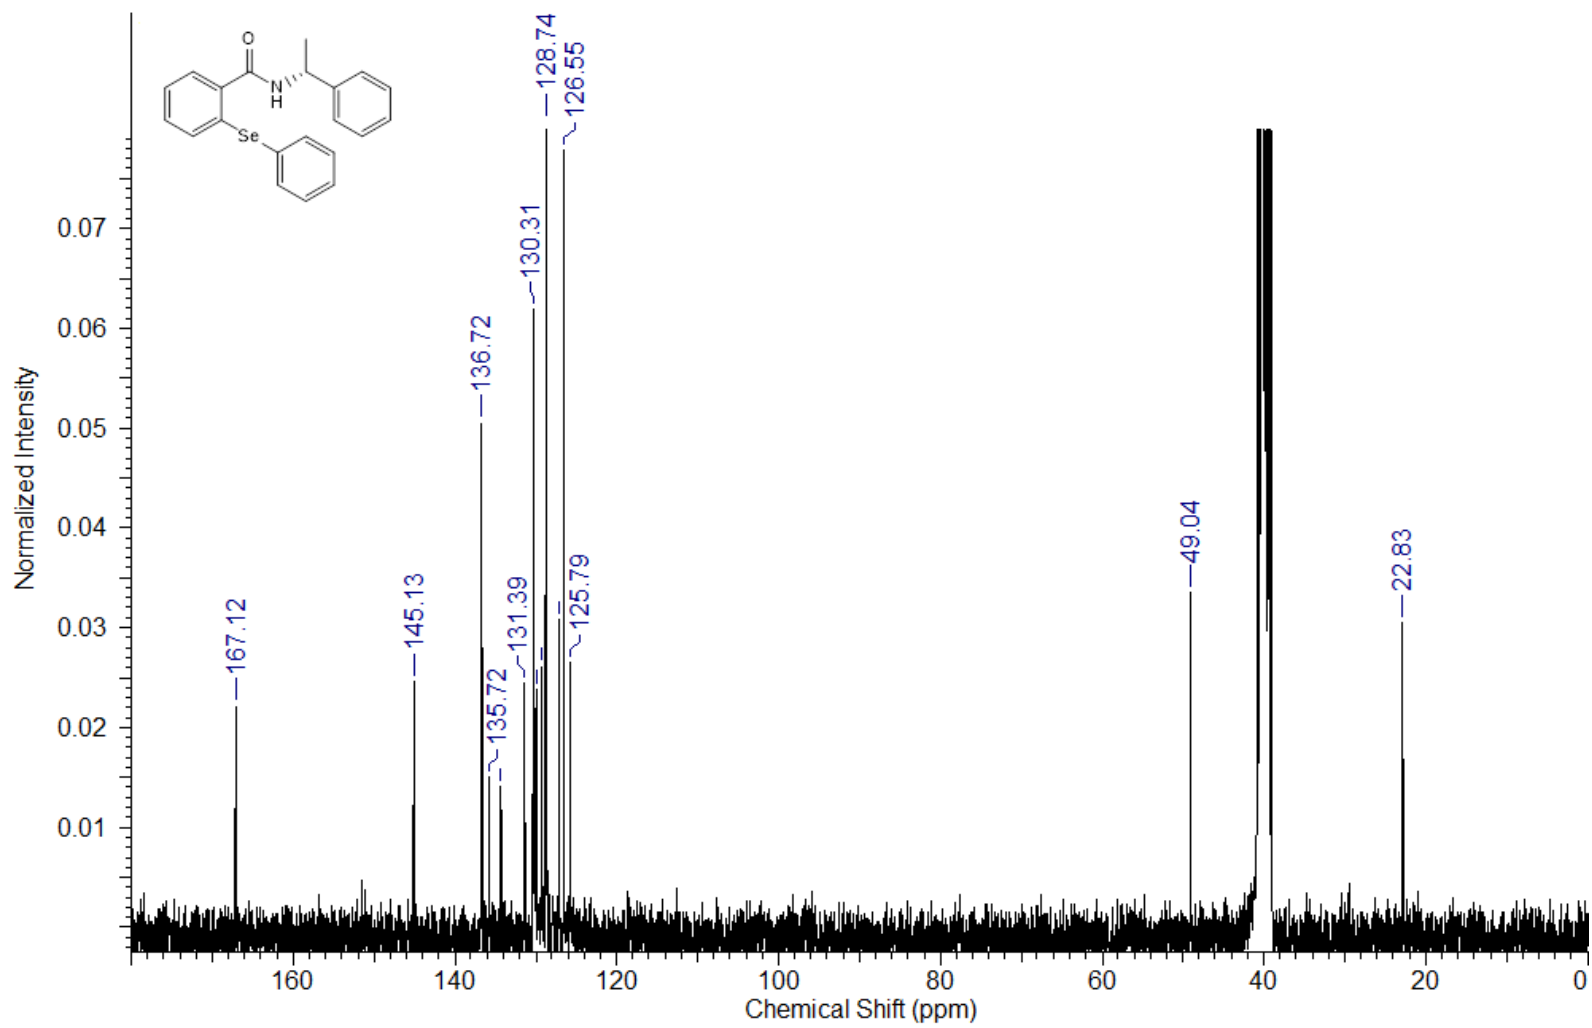

$^{13}\text{C}$  NMR spectra

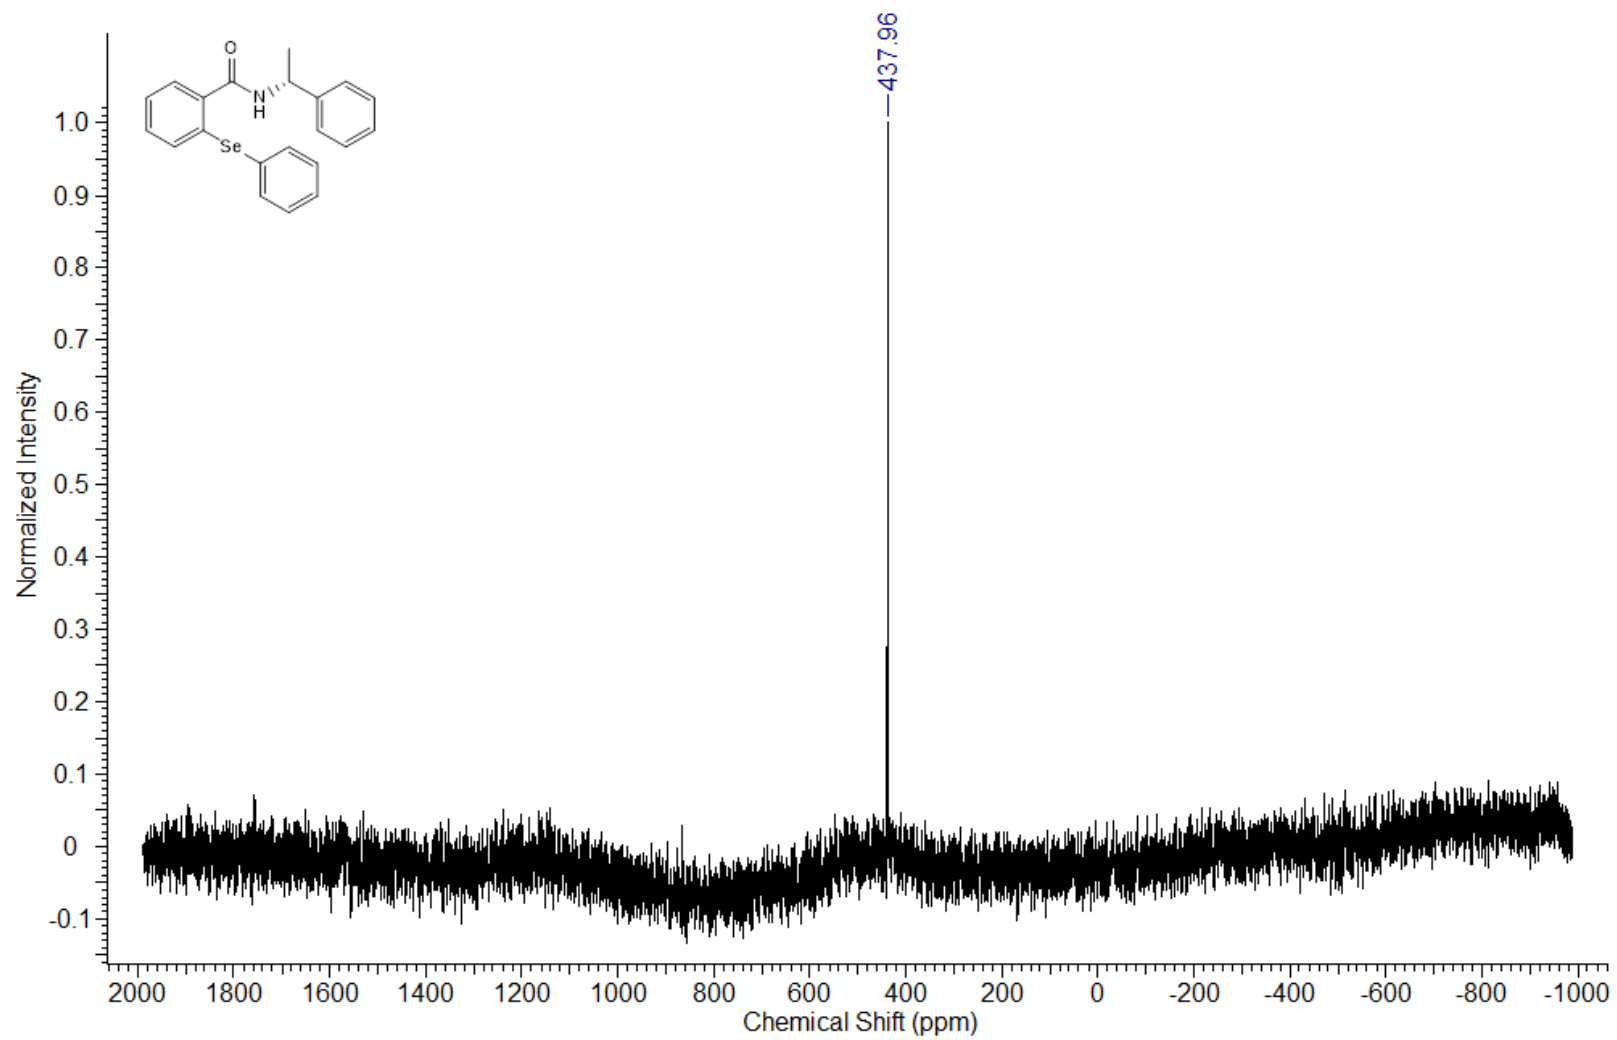

$^{77}\text{Se}$  NMR spectra

N-(S)-(-)- $\alpha$ -methylbenzyl-2-(phenylselanyl)benzamide **13**

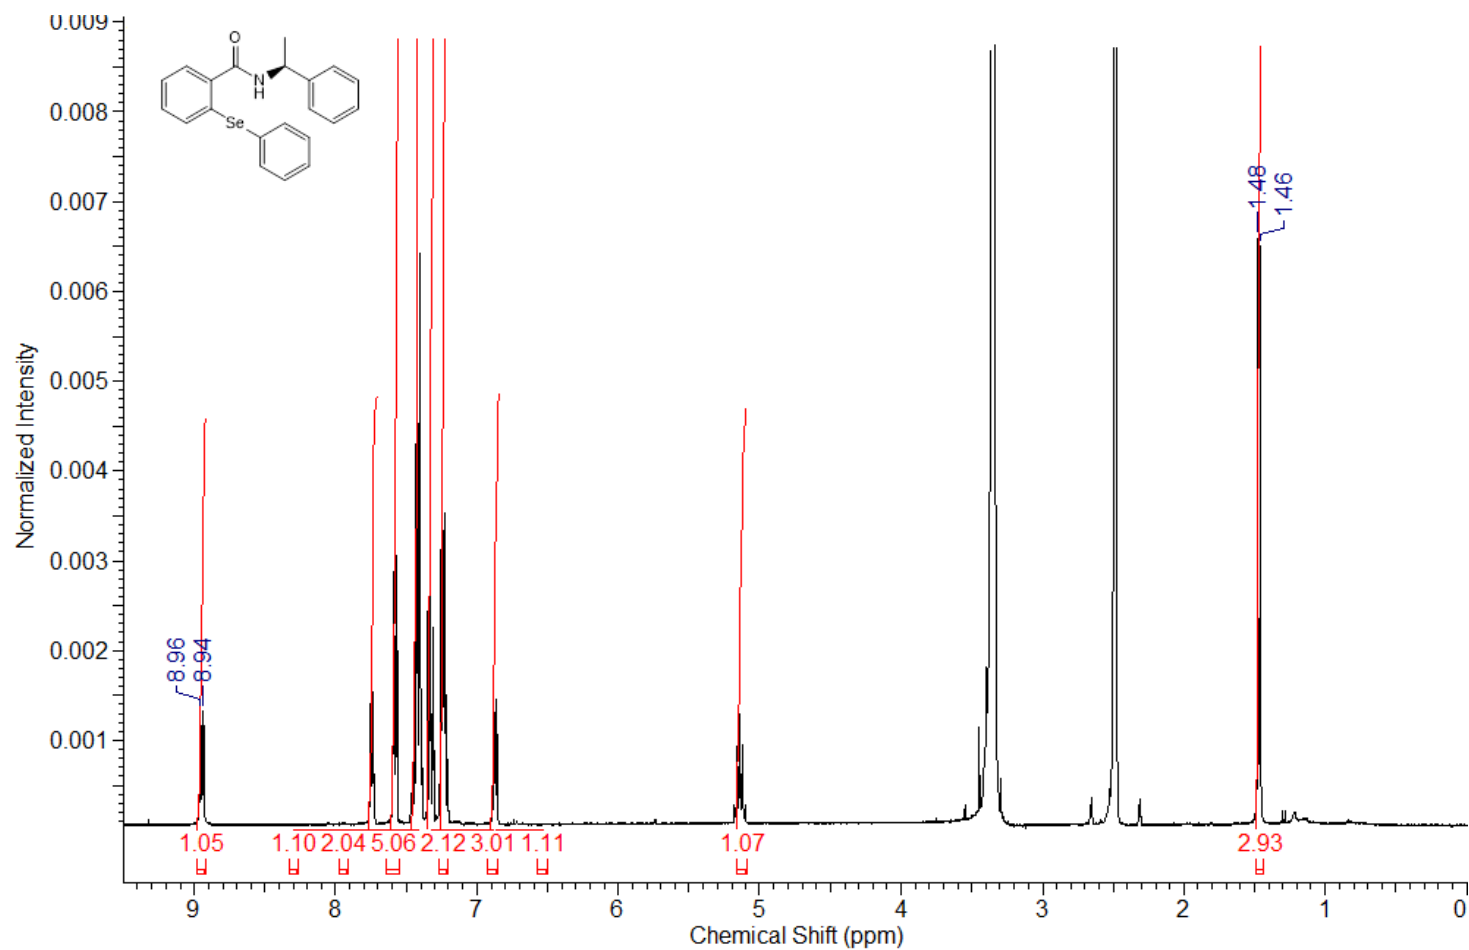

$^1\text{H}$  NMR spectra

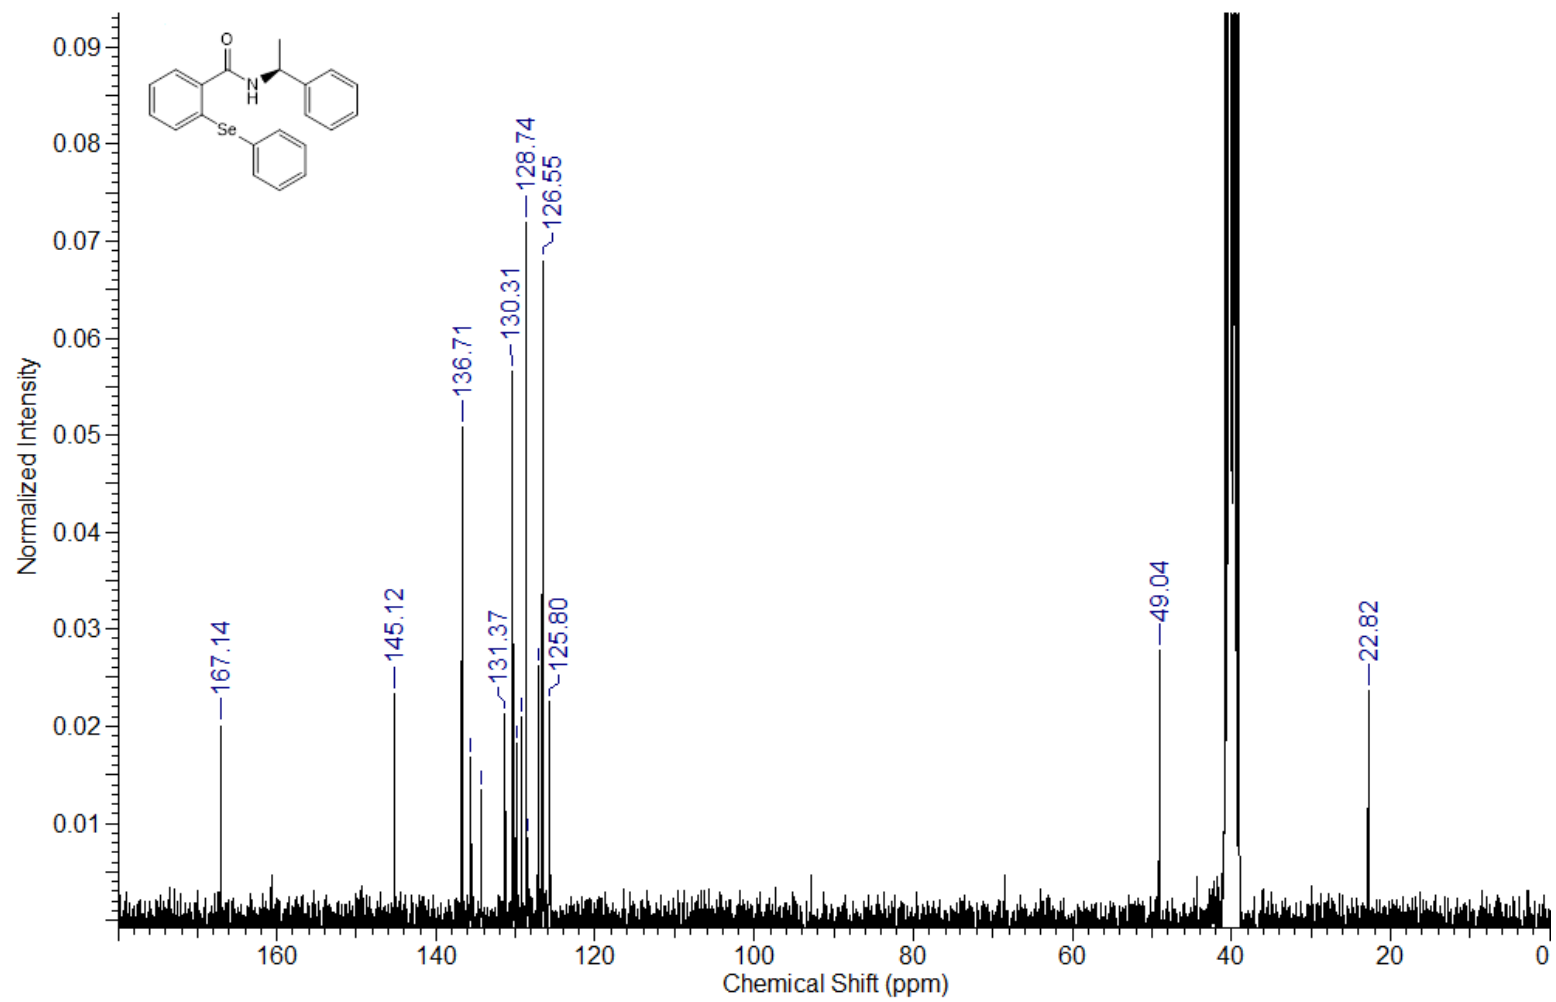

$^{13}\text{C}$  NMR spectra

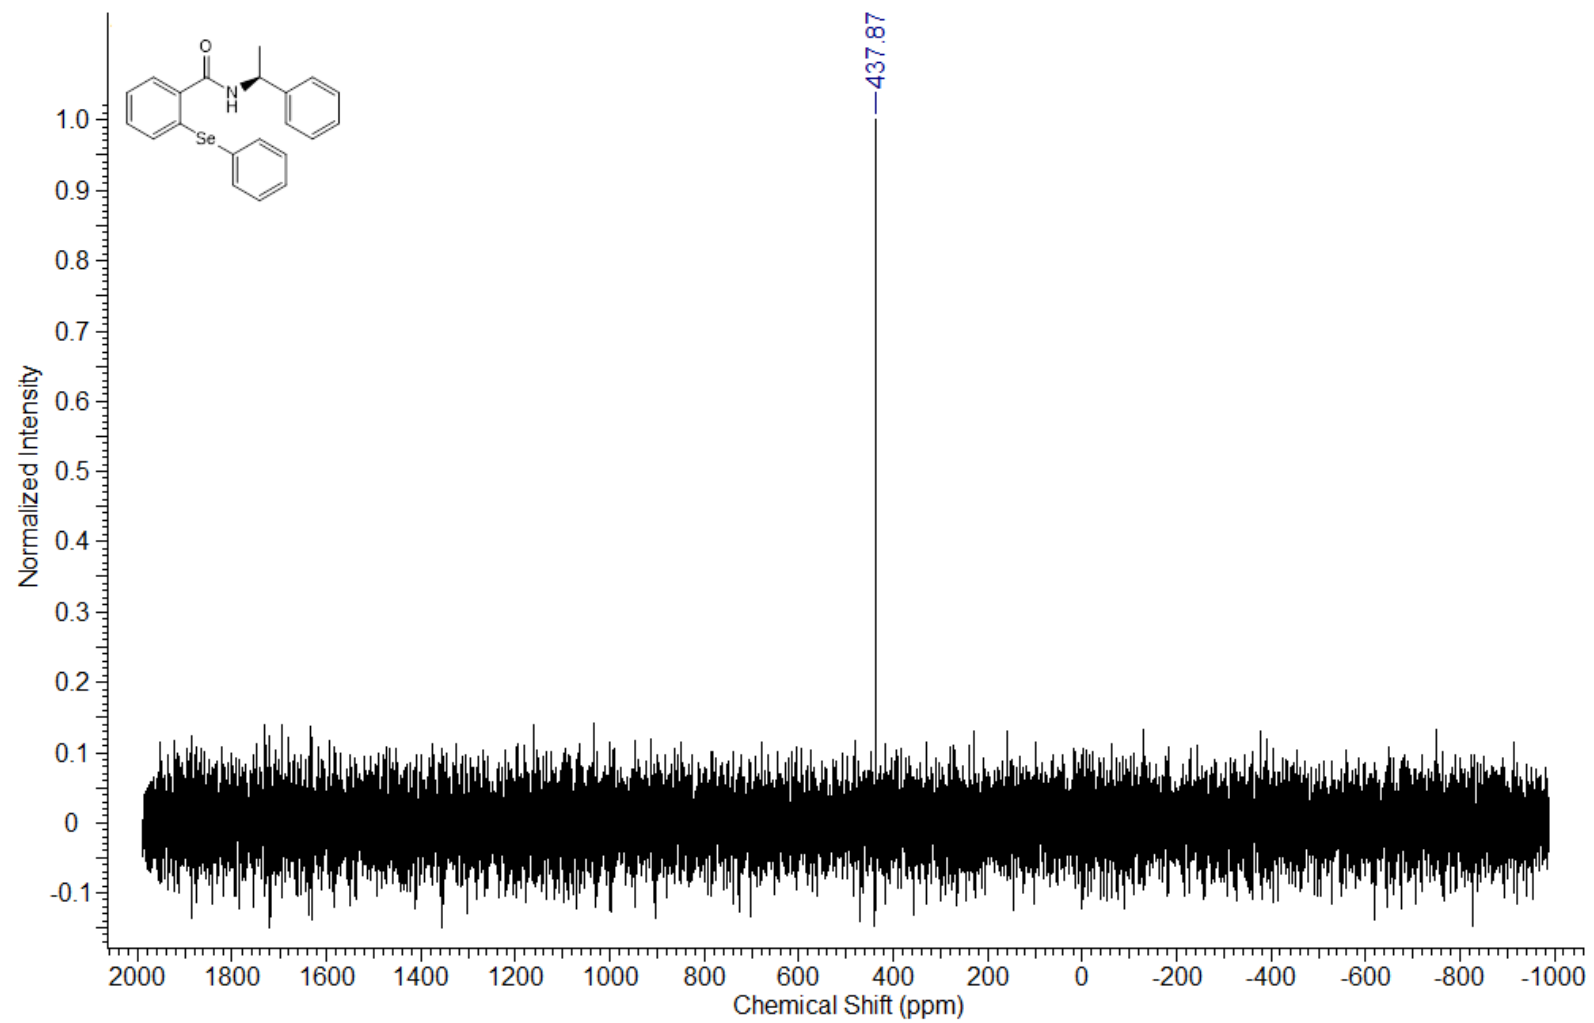

*<sup>77</sup>Se NMR spectra*

*N*-(*S*)-(-)-1-(1-naphthyl)ethyl-2-(phenylselanyl)benzamide **14**

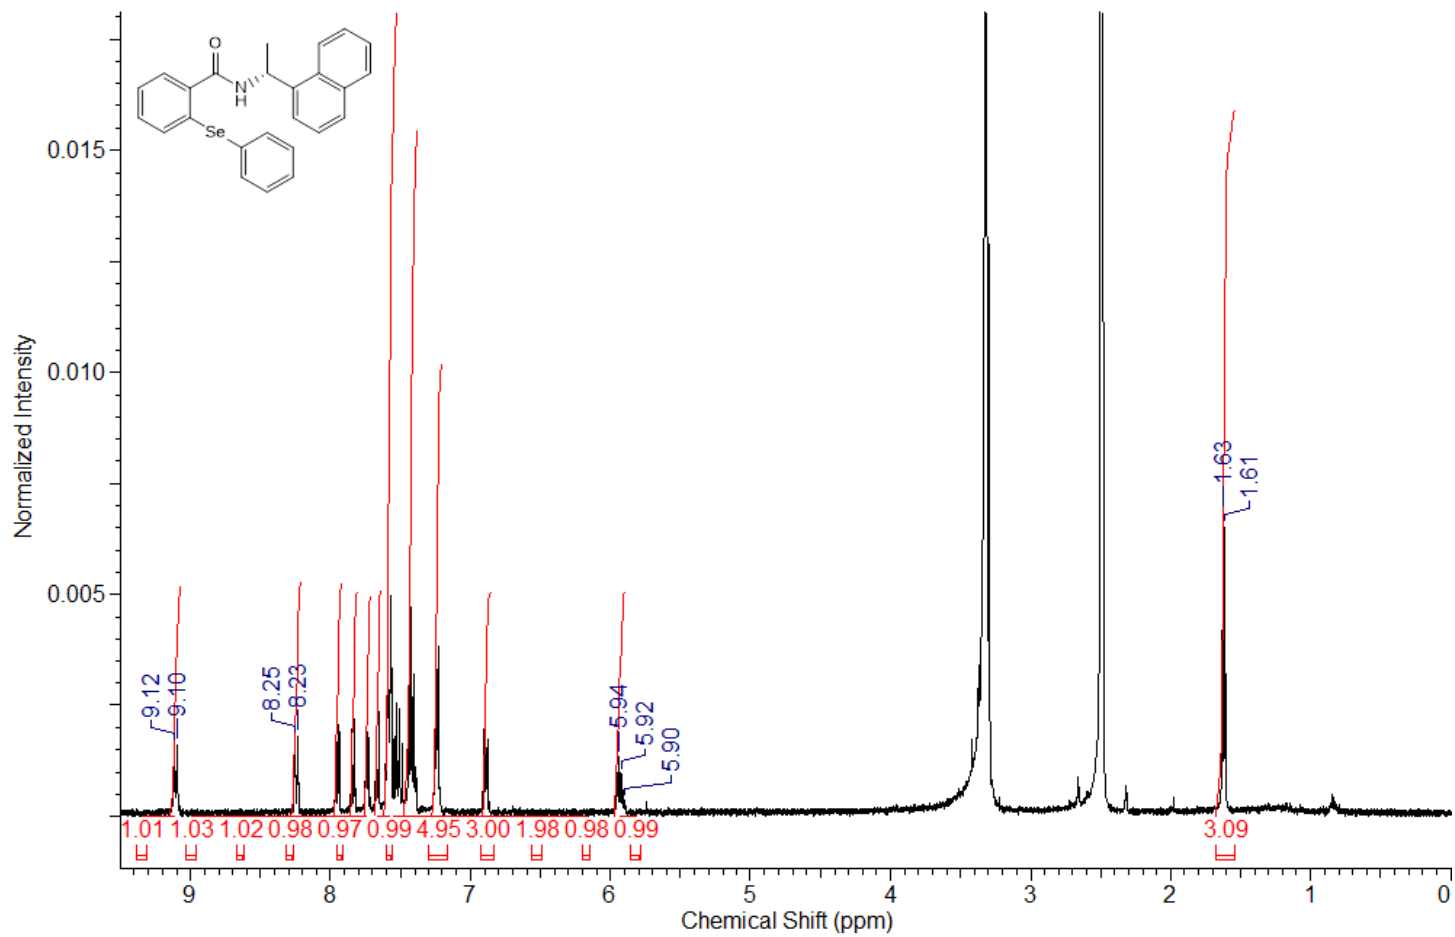

<sup>1</sup>H NMR spectra



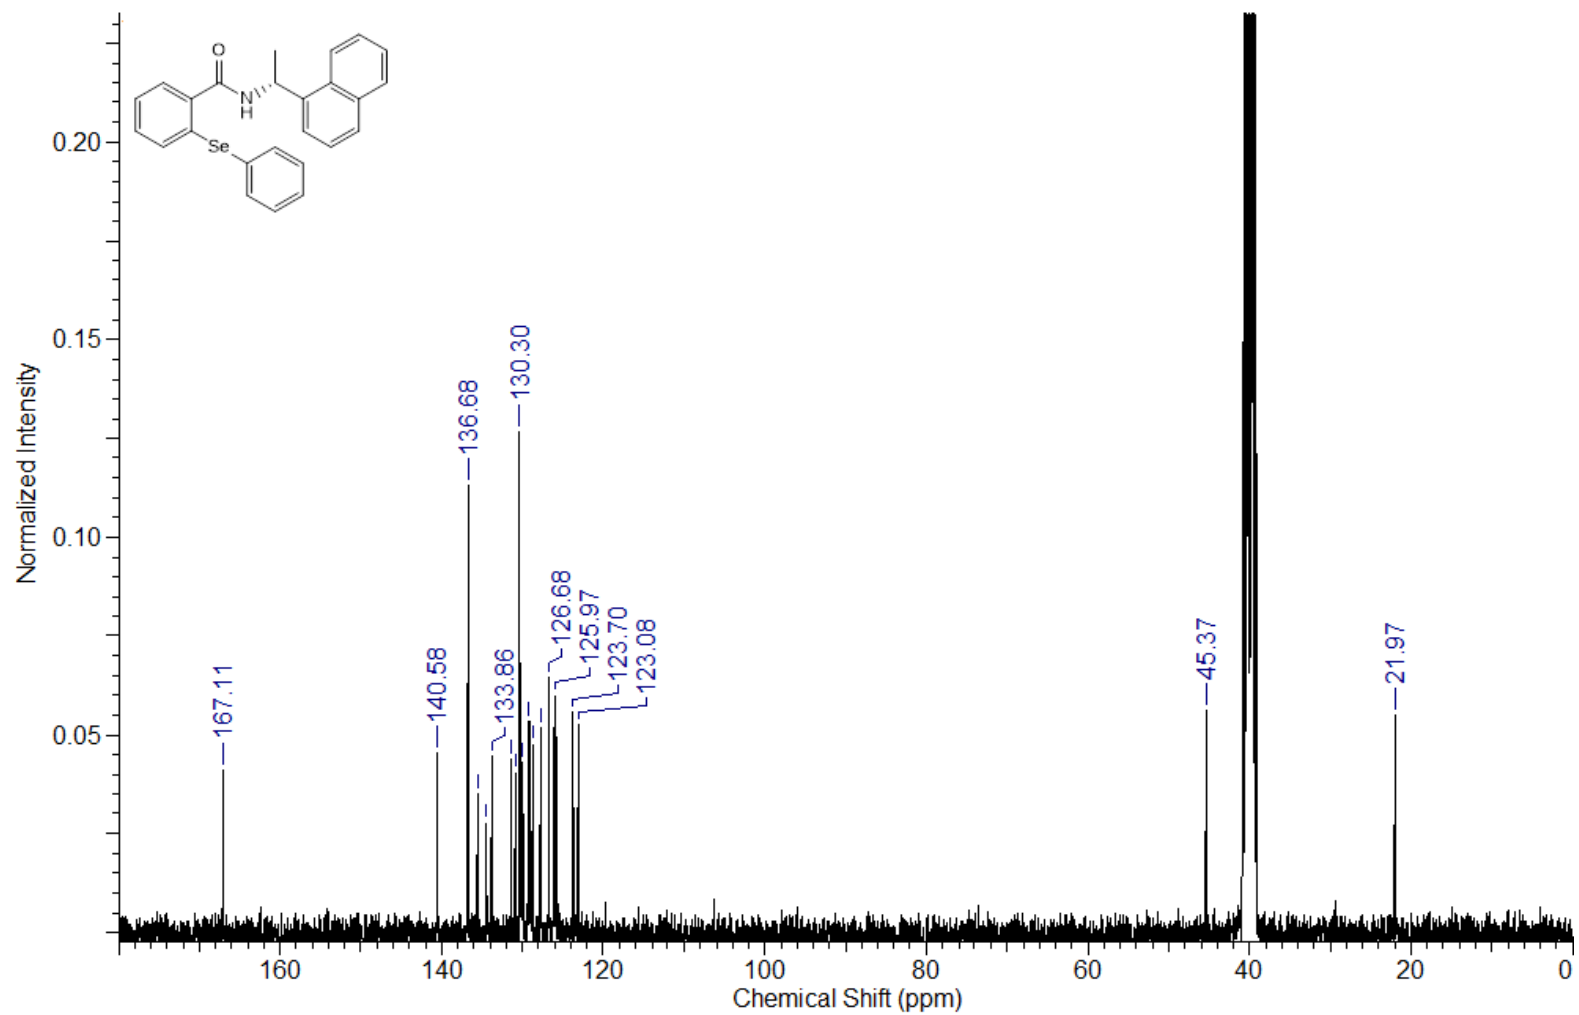

$^{13}\text{C}$  NMR spectra

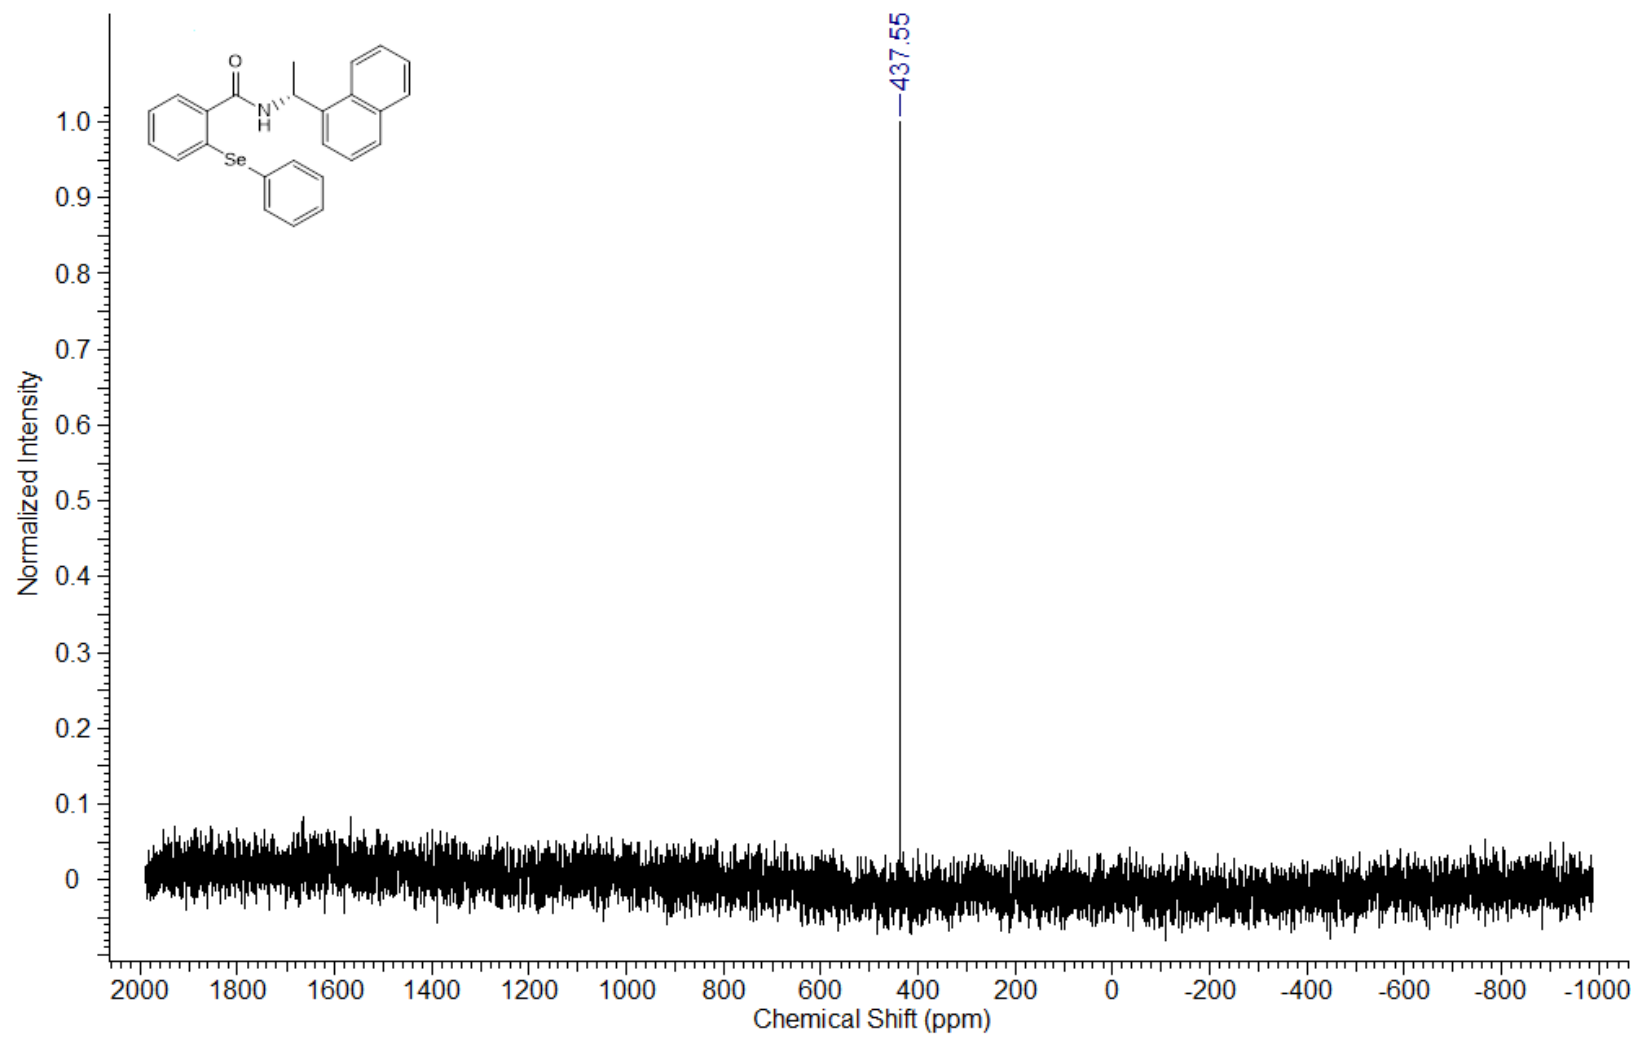

$^{77}\text{Se}$  NMR spectra

*N*-(*R*)-(+)-1-(1-naphthyl)ethyl-2-(phenylselanyl)benzamide **15**

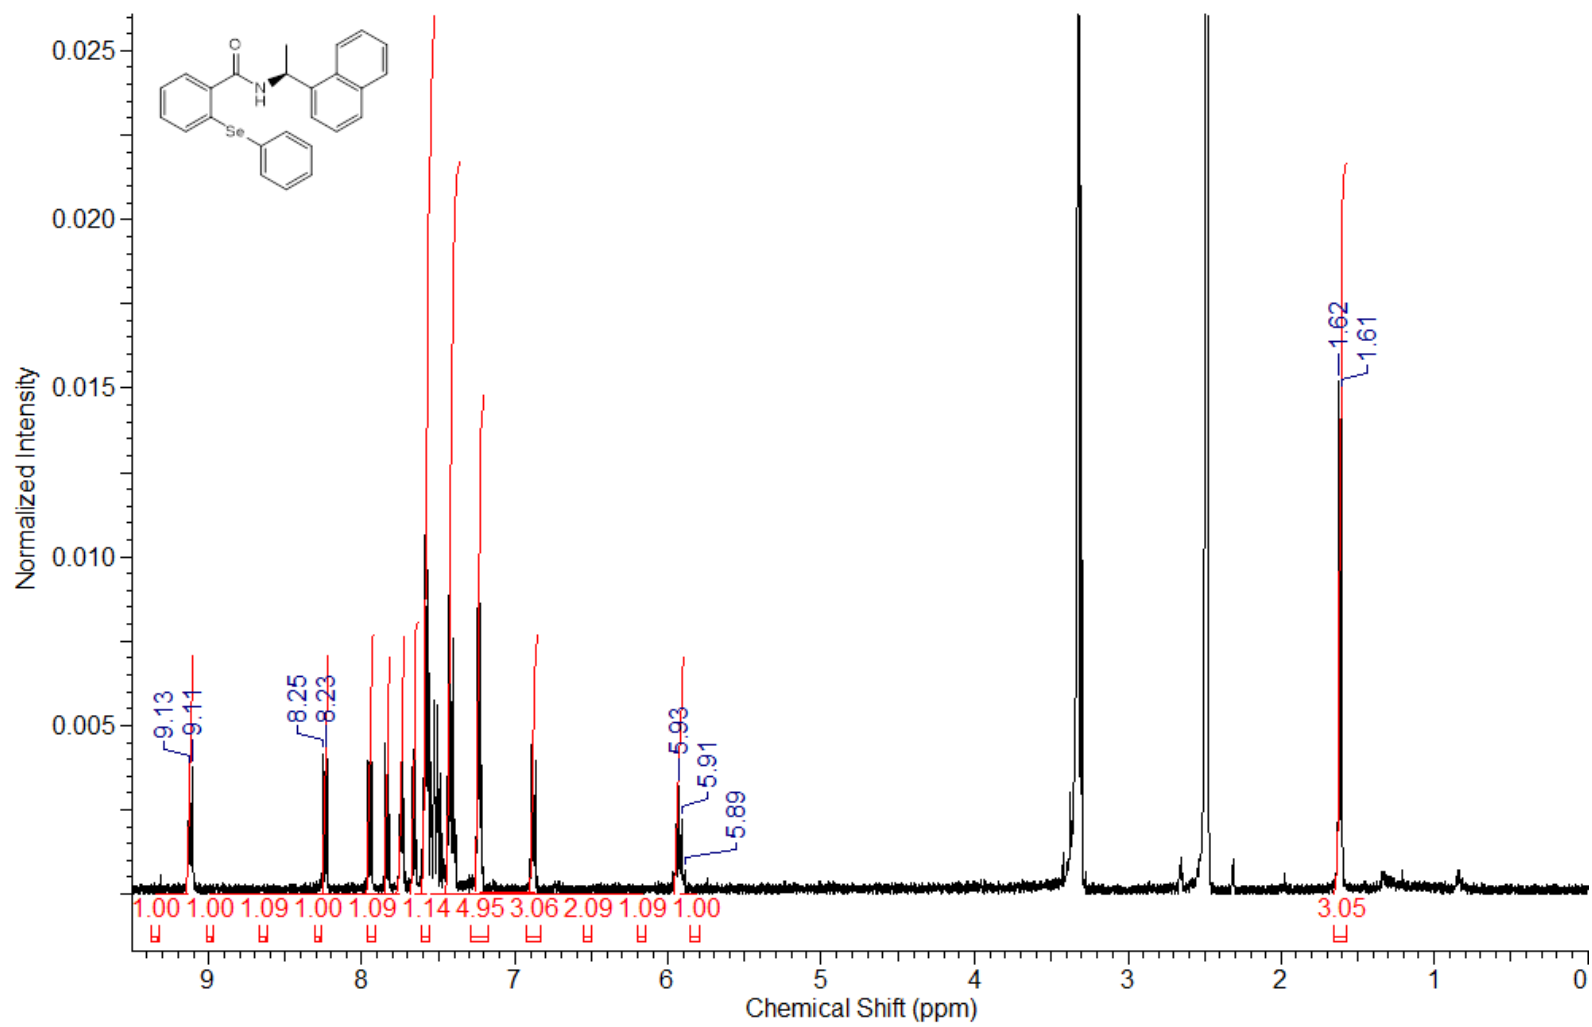

<sup>1</sup>H NMR spectra

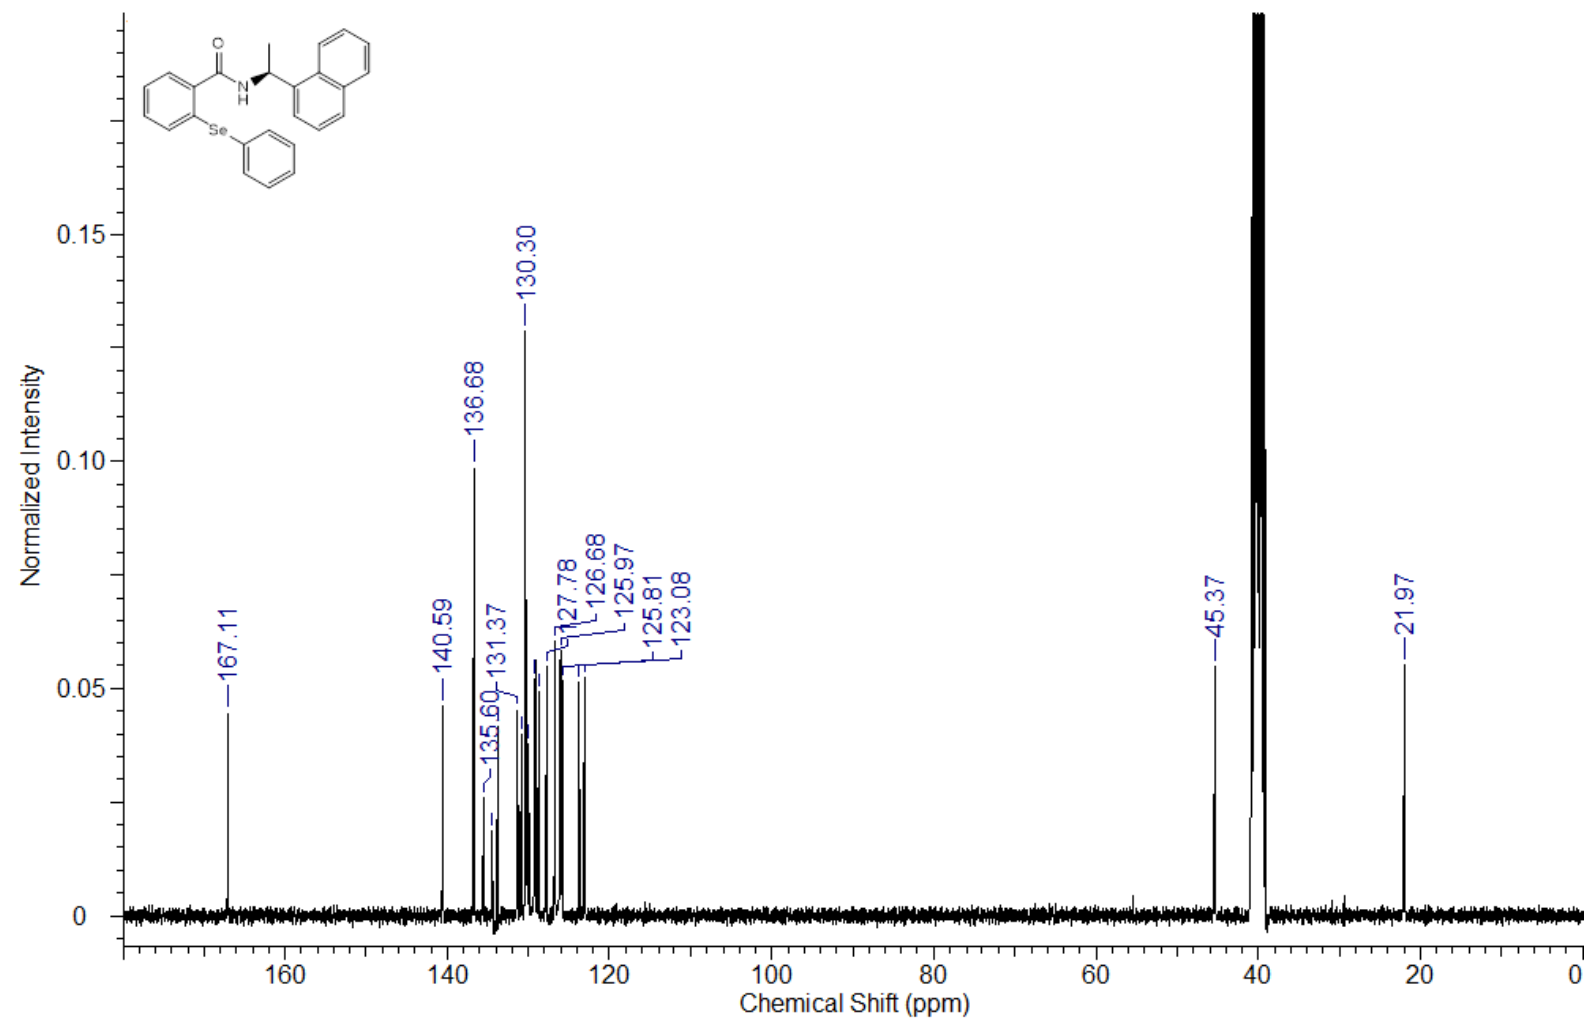

$^{13}\text{C}$  NMR spectra

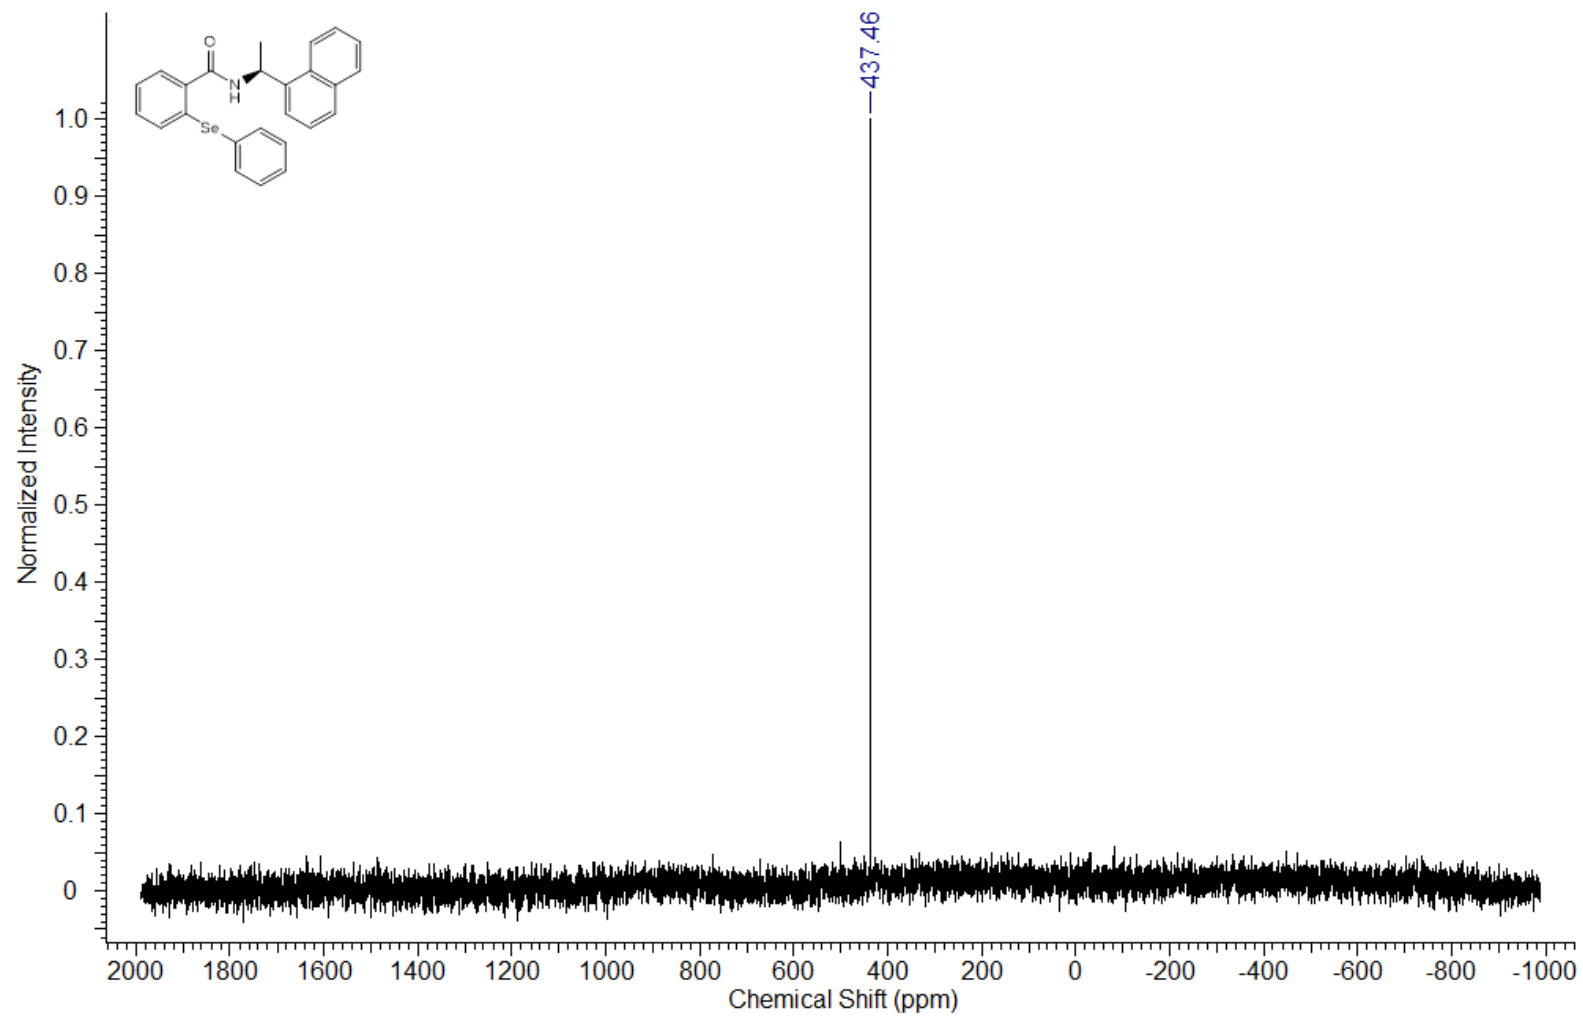

*<sup>77</sup>Se NMR spectra*

*N*-(1*S*,2*R*)-(-)-*cis*-2-hydroxy-1-indanyl-2-(phenylselanyl)benzamide **16**

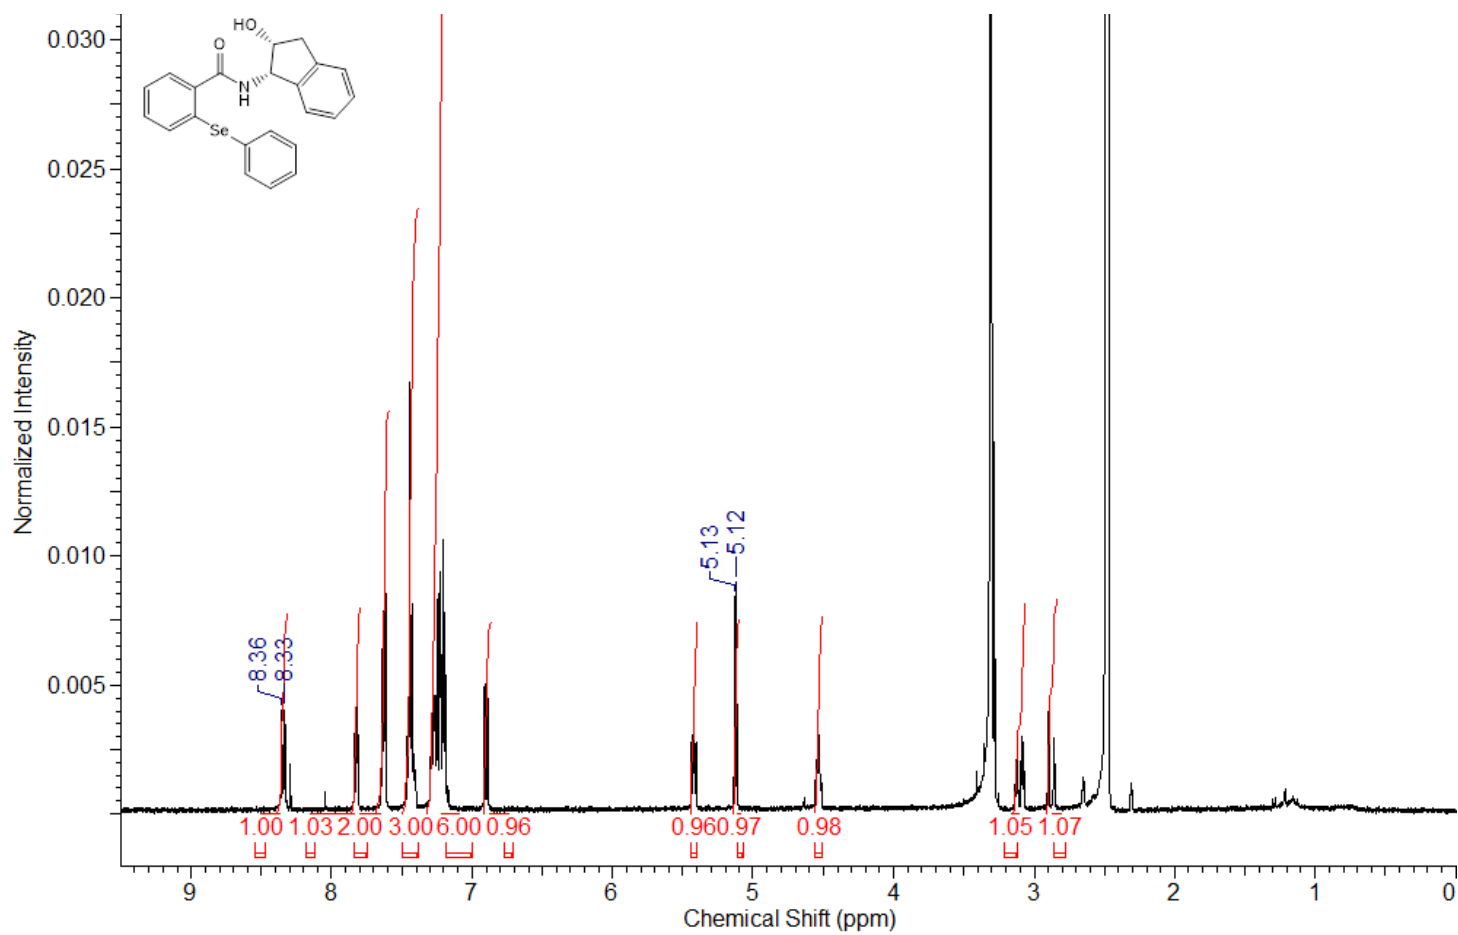

<sup>1</sup>H NMR spectra

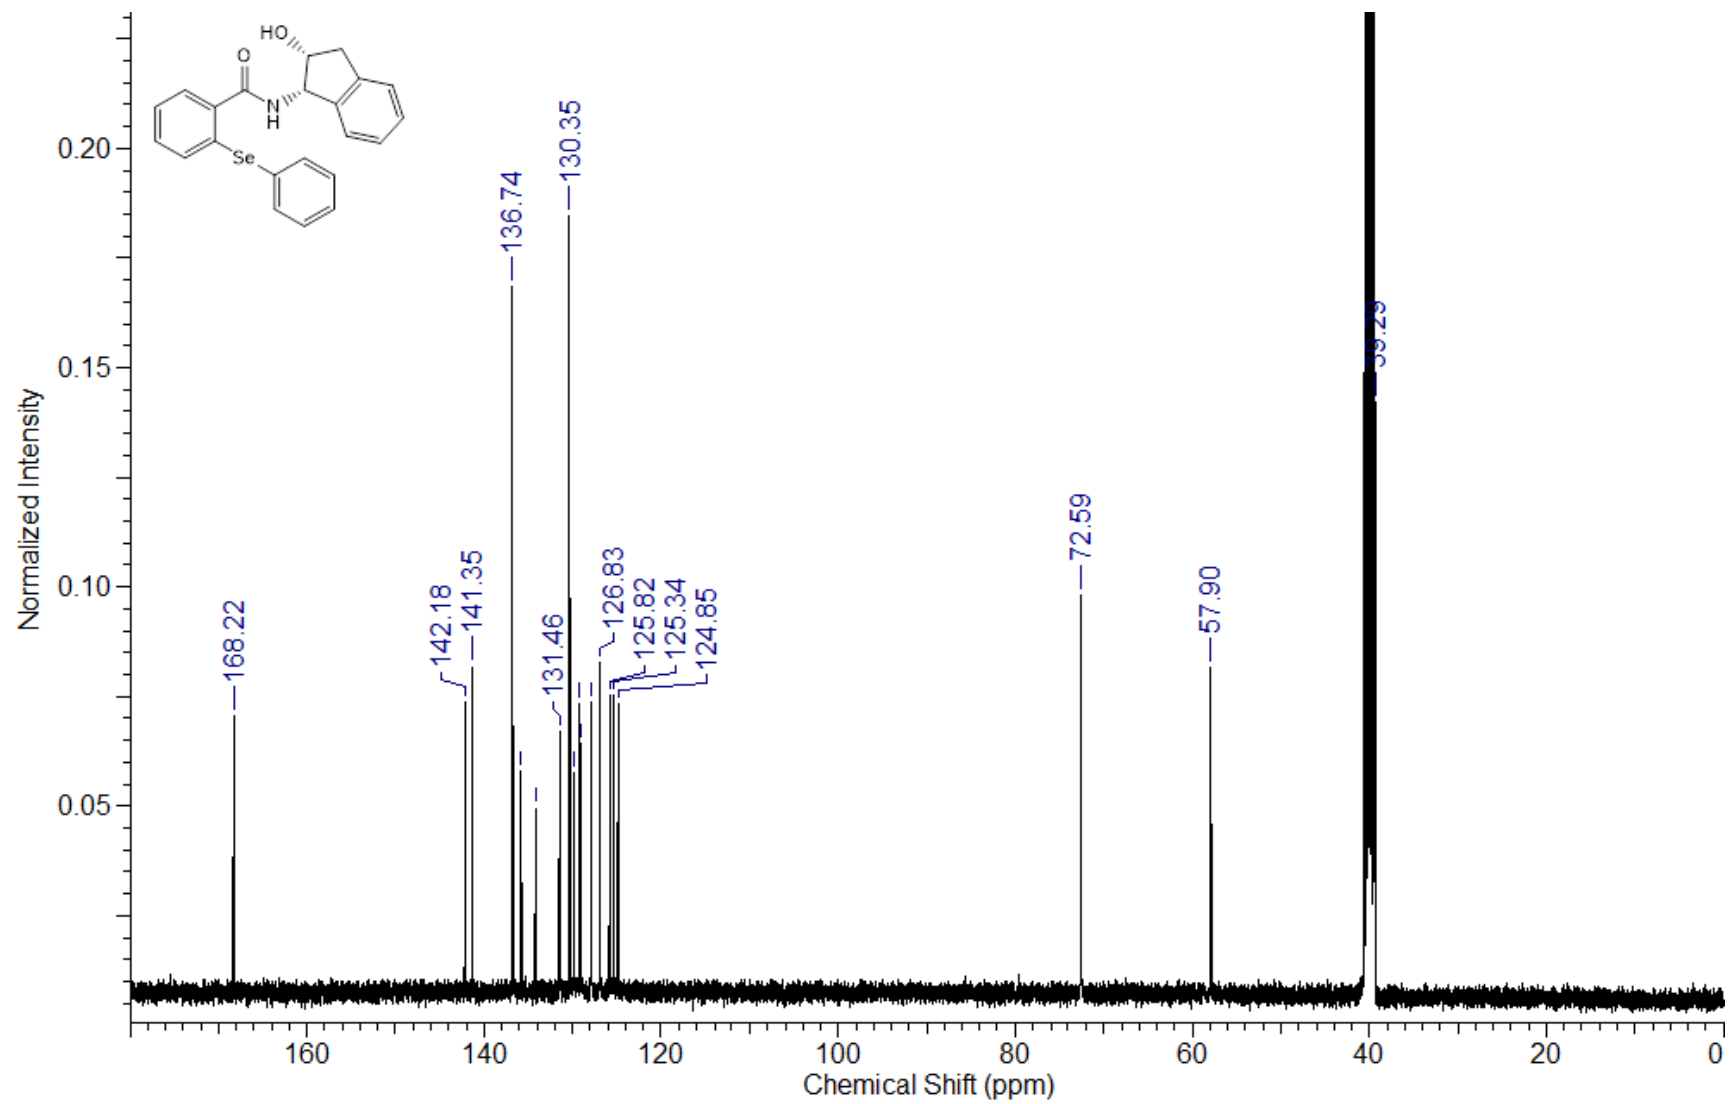

$^{13}\text{C}$  NMR spectra

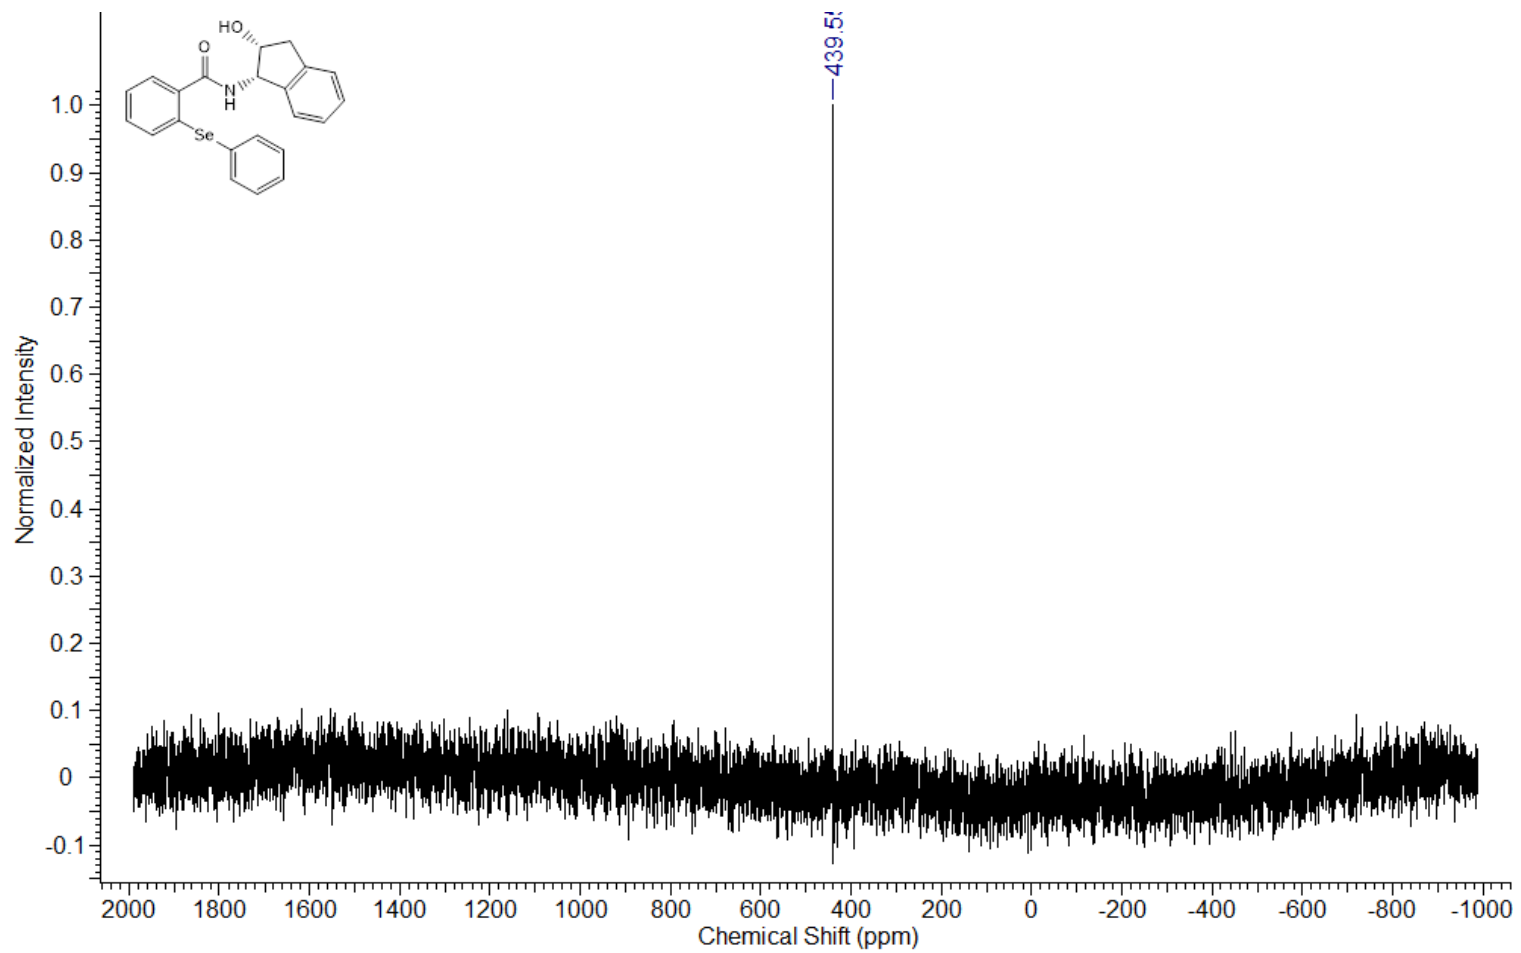

<sup>77</sup>Se NMR spectra



*N*-(1*R*,2*S*)-(+)-*cis*-2-hydroxy-1-indanyl-2-(phenylselanyl)benzamide **17**

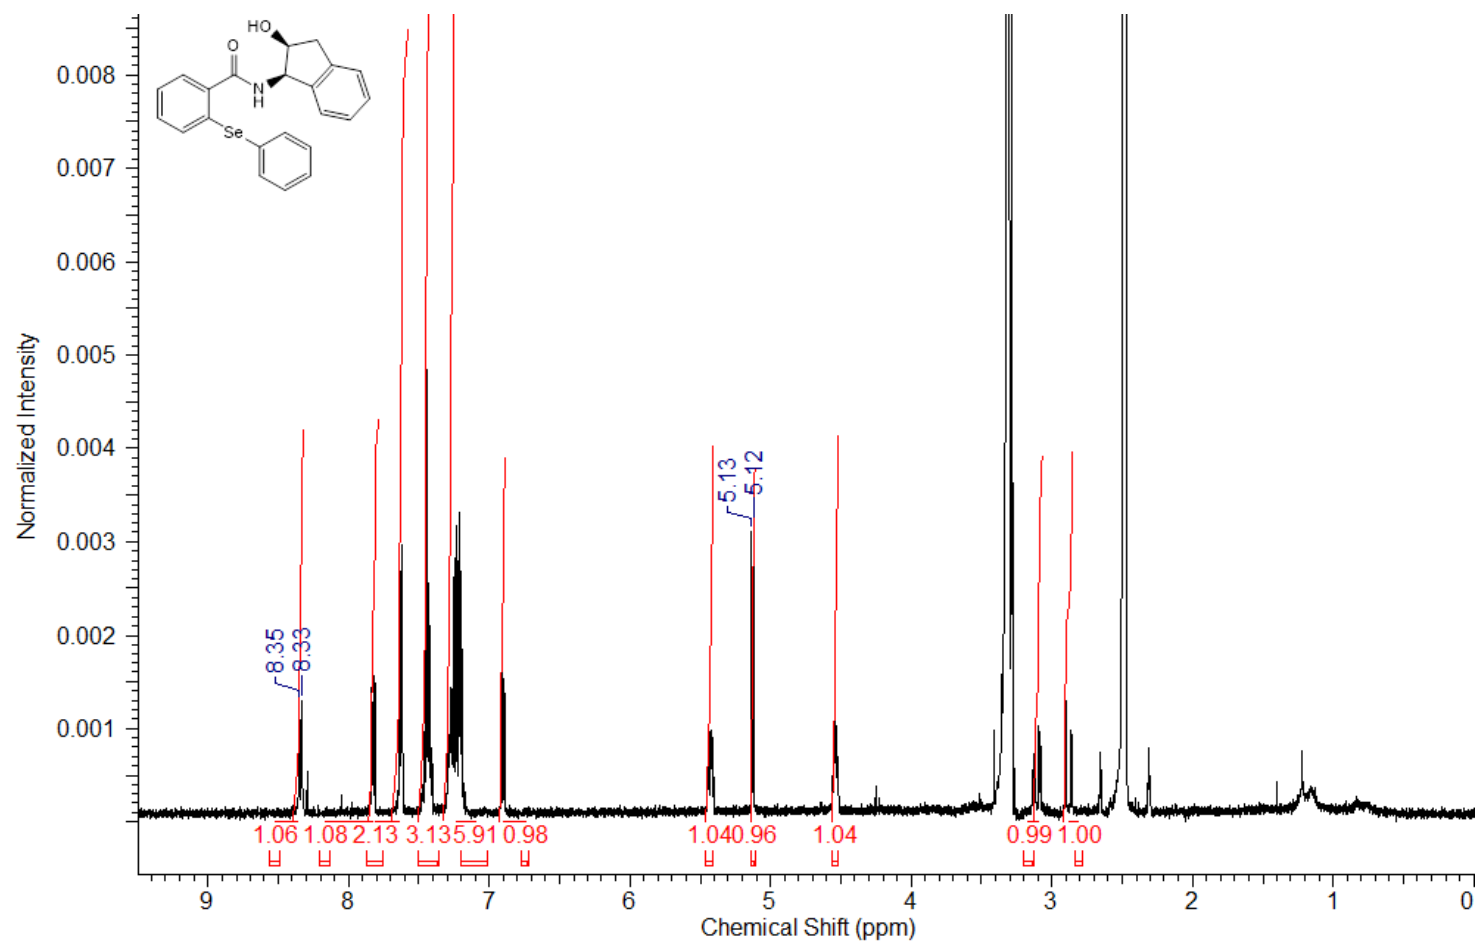

<sup>1</sup>H NMR spectra

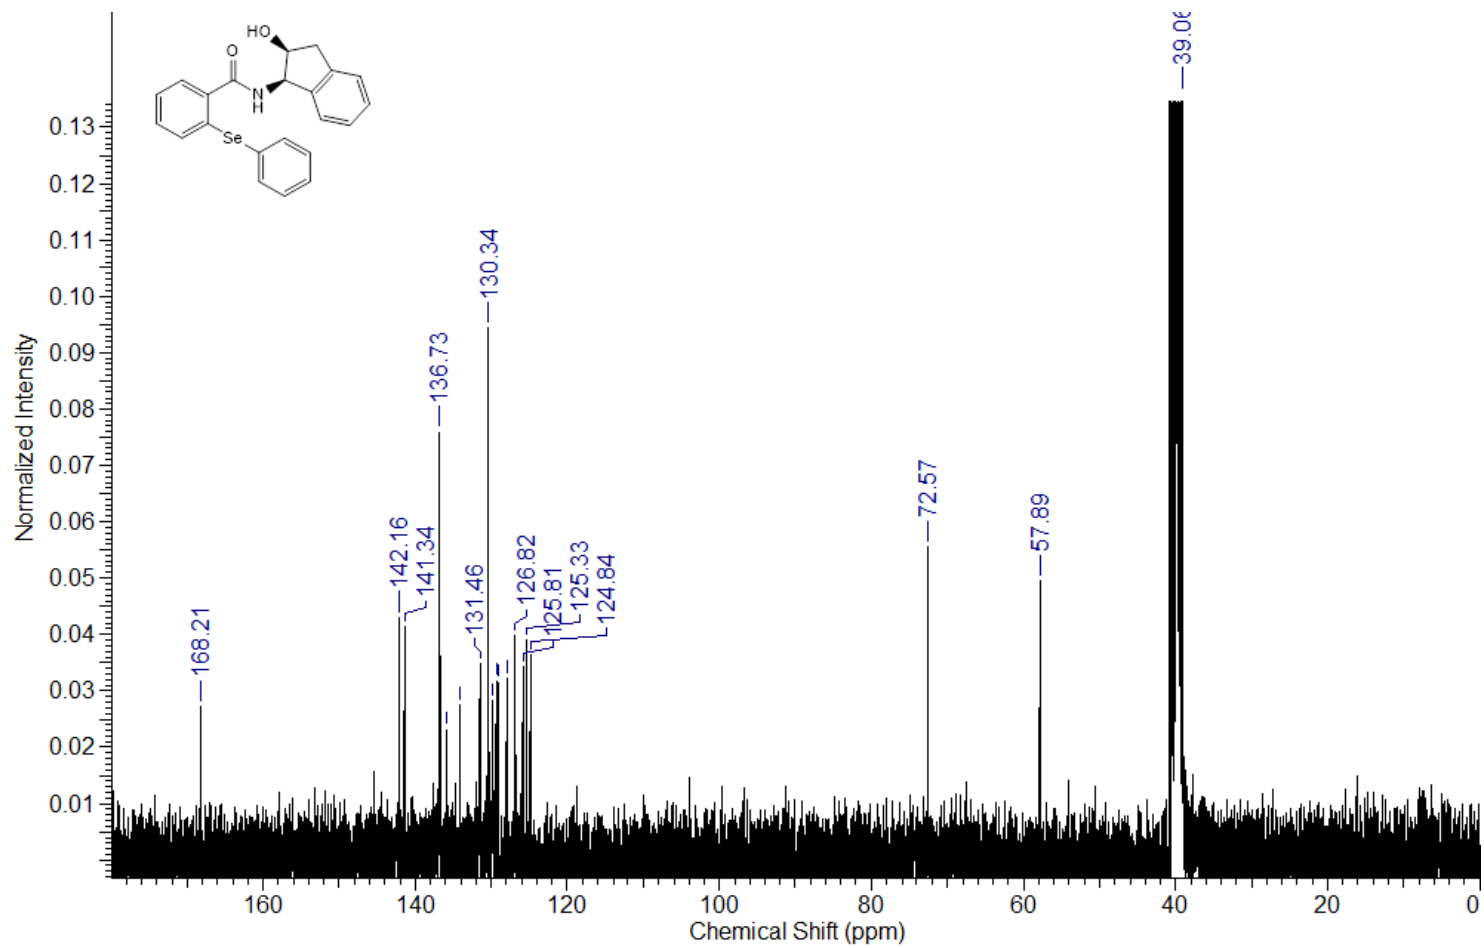

$^{13}\text{C}$  NMR spectra

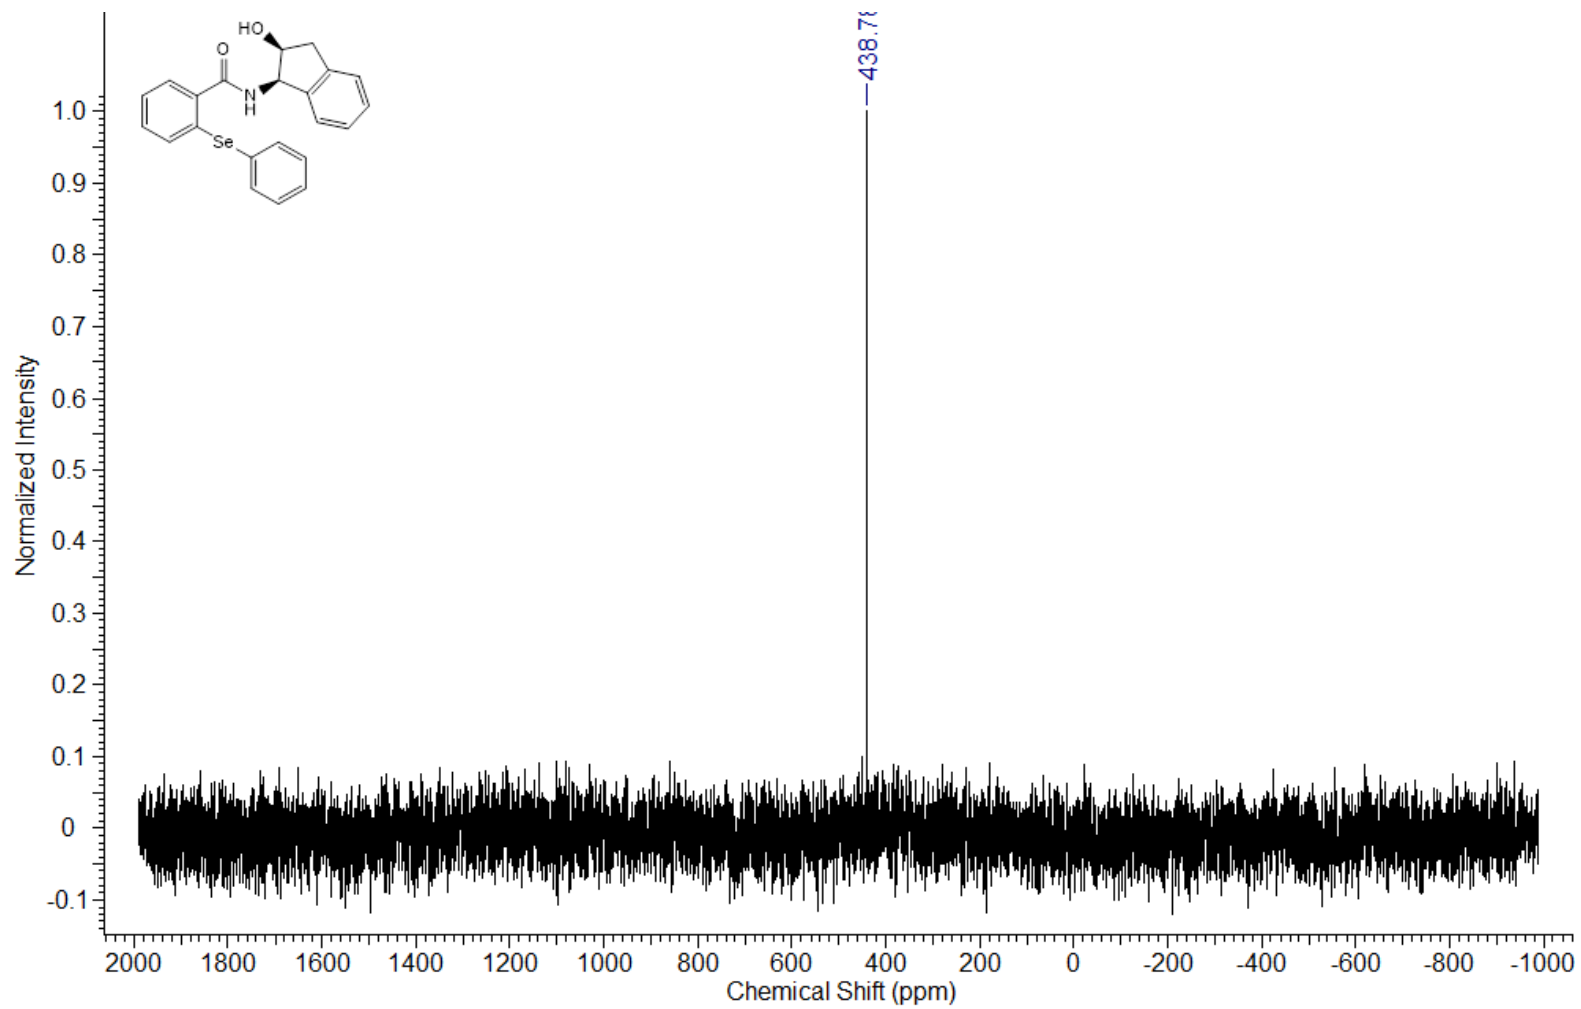

$^{77}\text{Se}$  NMR spectra

*N*-(1*S*,2*S*)-(+)-*trans*-2-hydroxy-1-indanyl- 2-(phenylselanyl)benzamide **18**

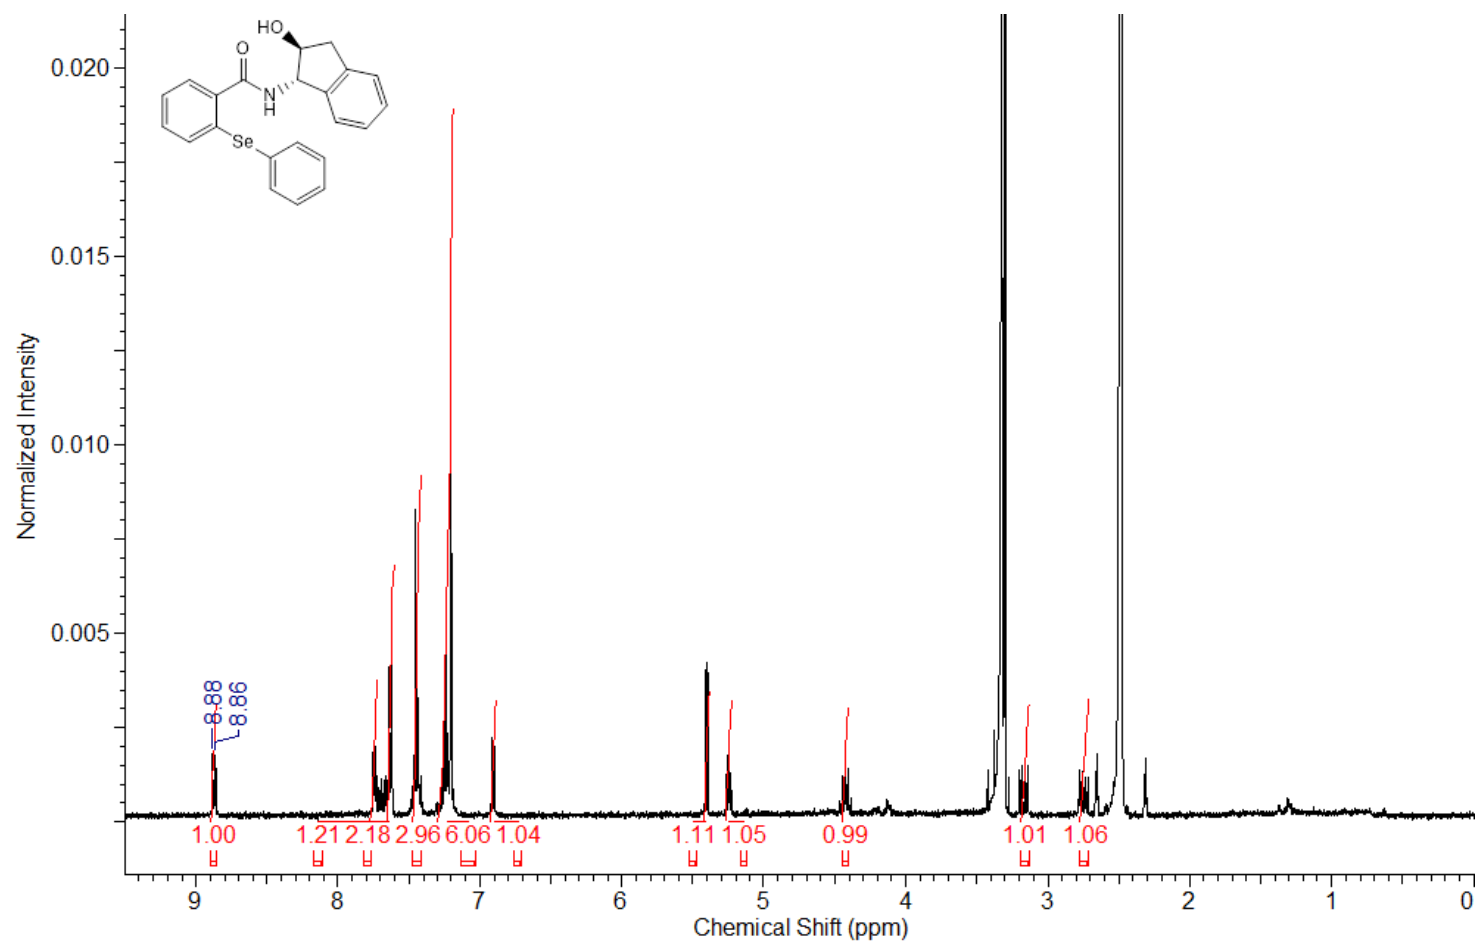

<sup>1</sup>H NMR spectra

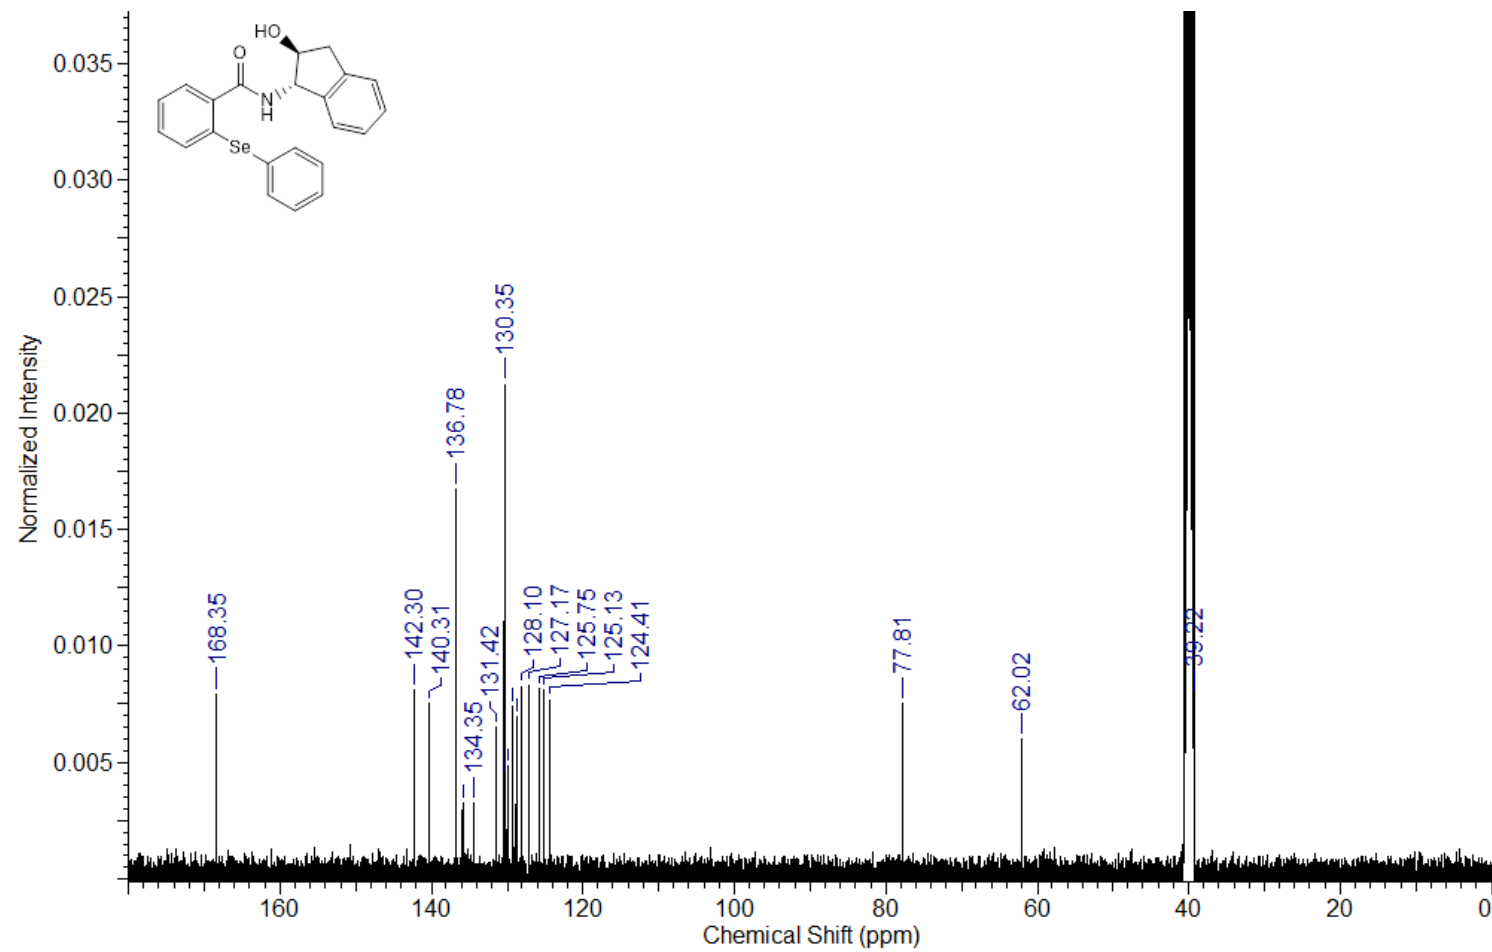

$^{13}\text{C}$  NMR spectra

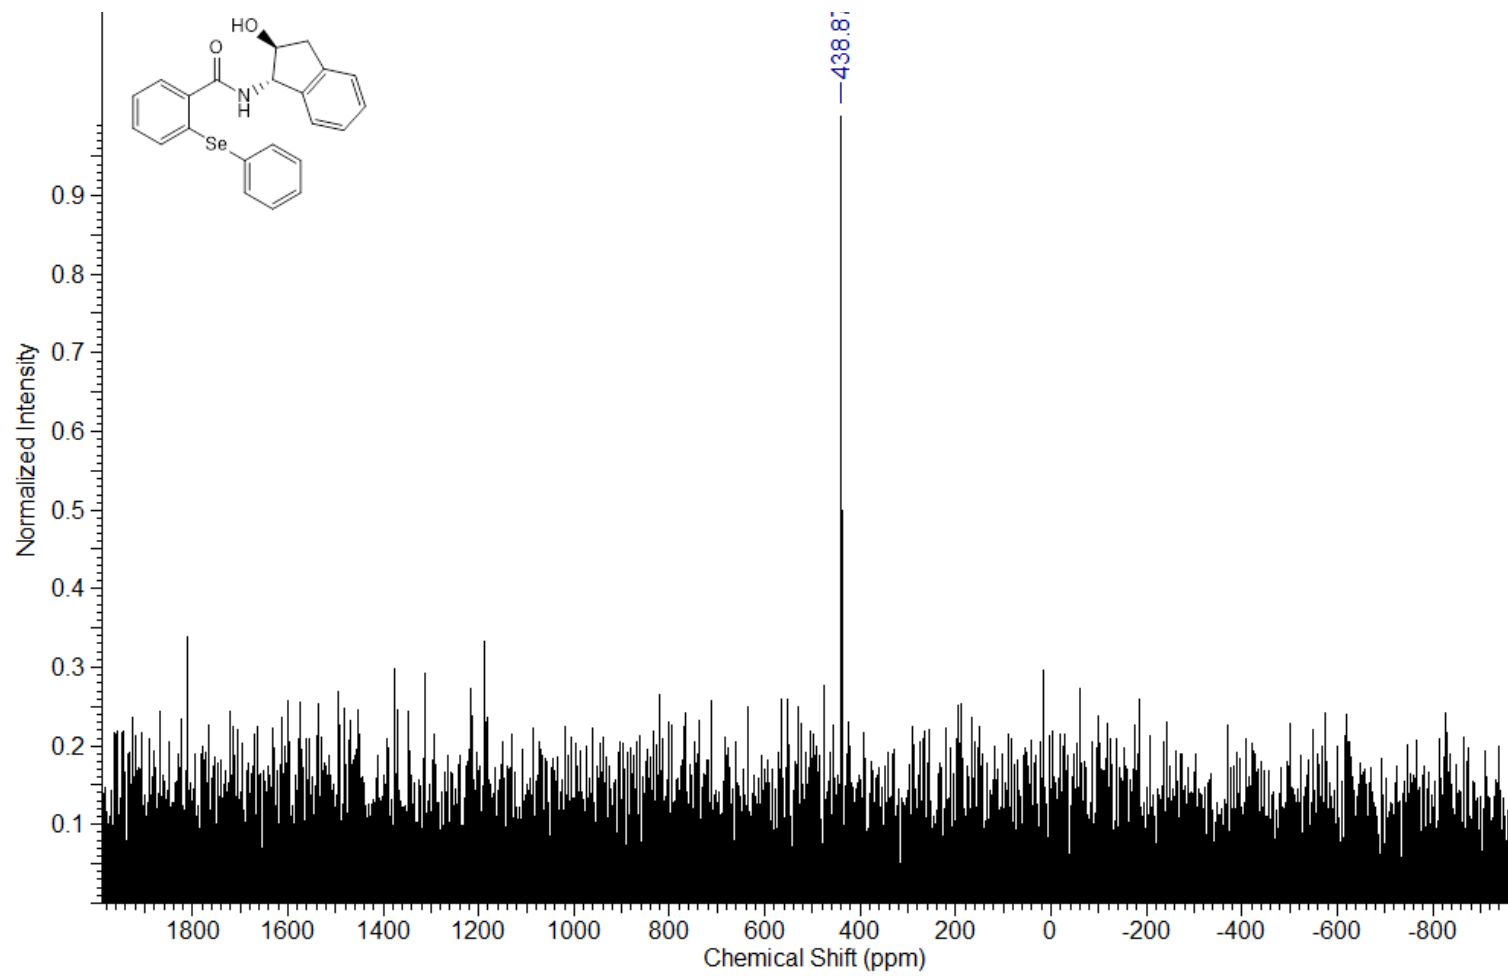

$^{77}\text{Se}$  NMR spectra

*N*-(1*R*,2*R*)-(-)-*trans*-2-hydroxy-1-indanyl- 2-(phenylselanyl)benzamide **19**

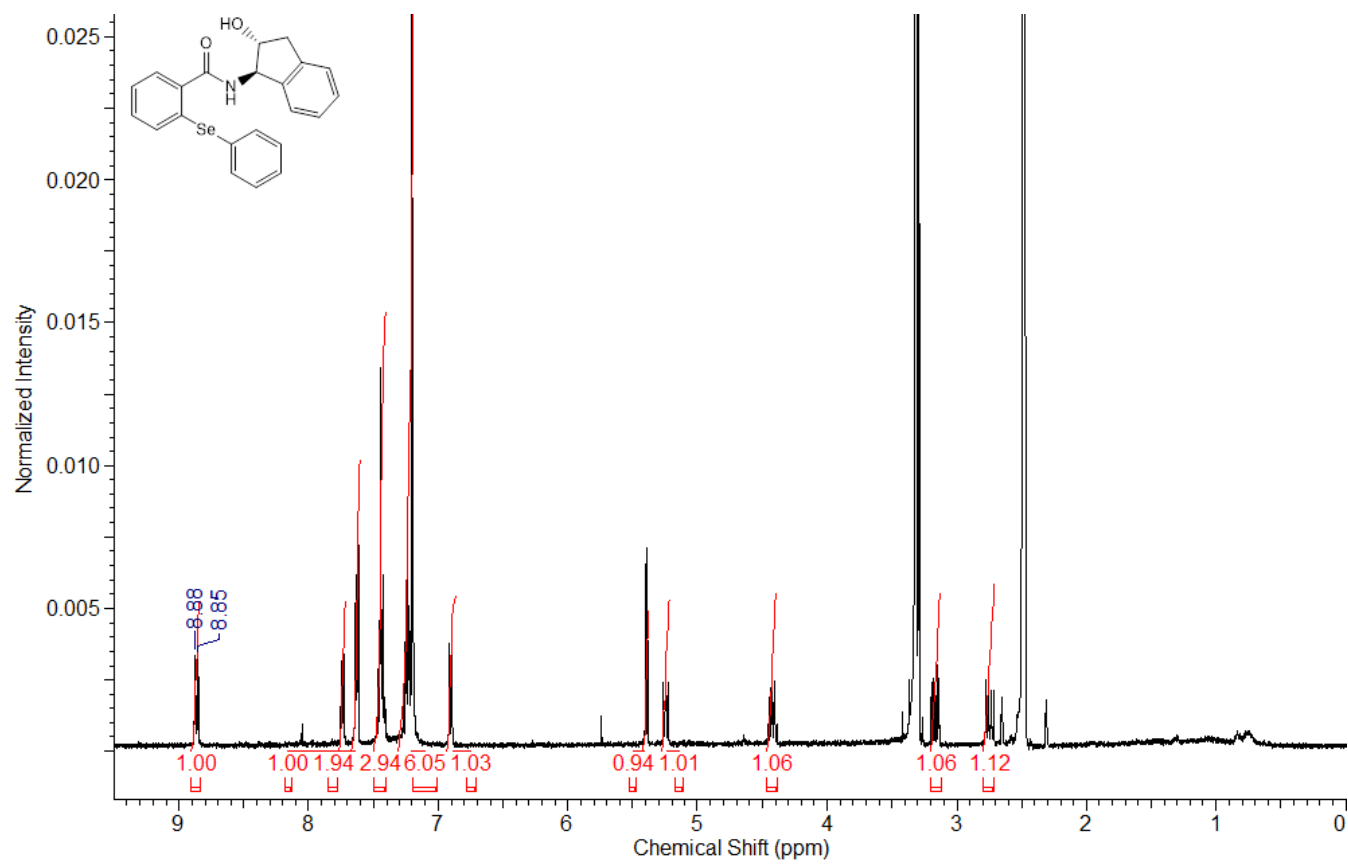

<sup>1</sup>H NMR spectra

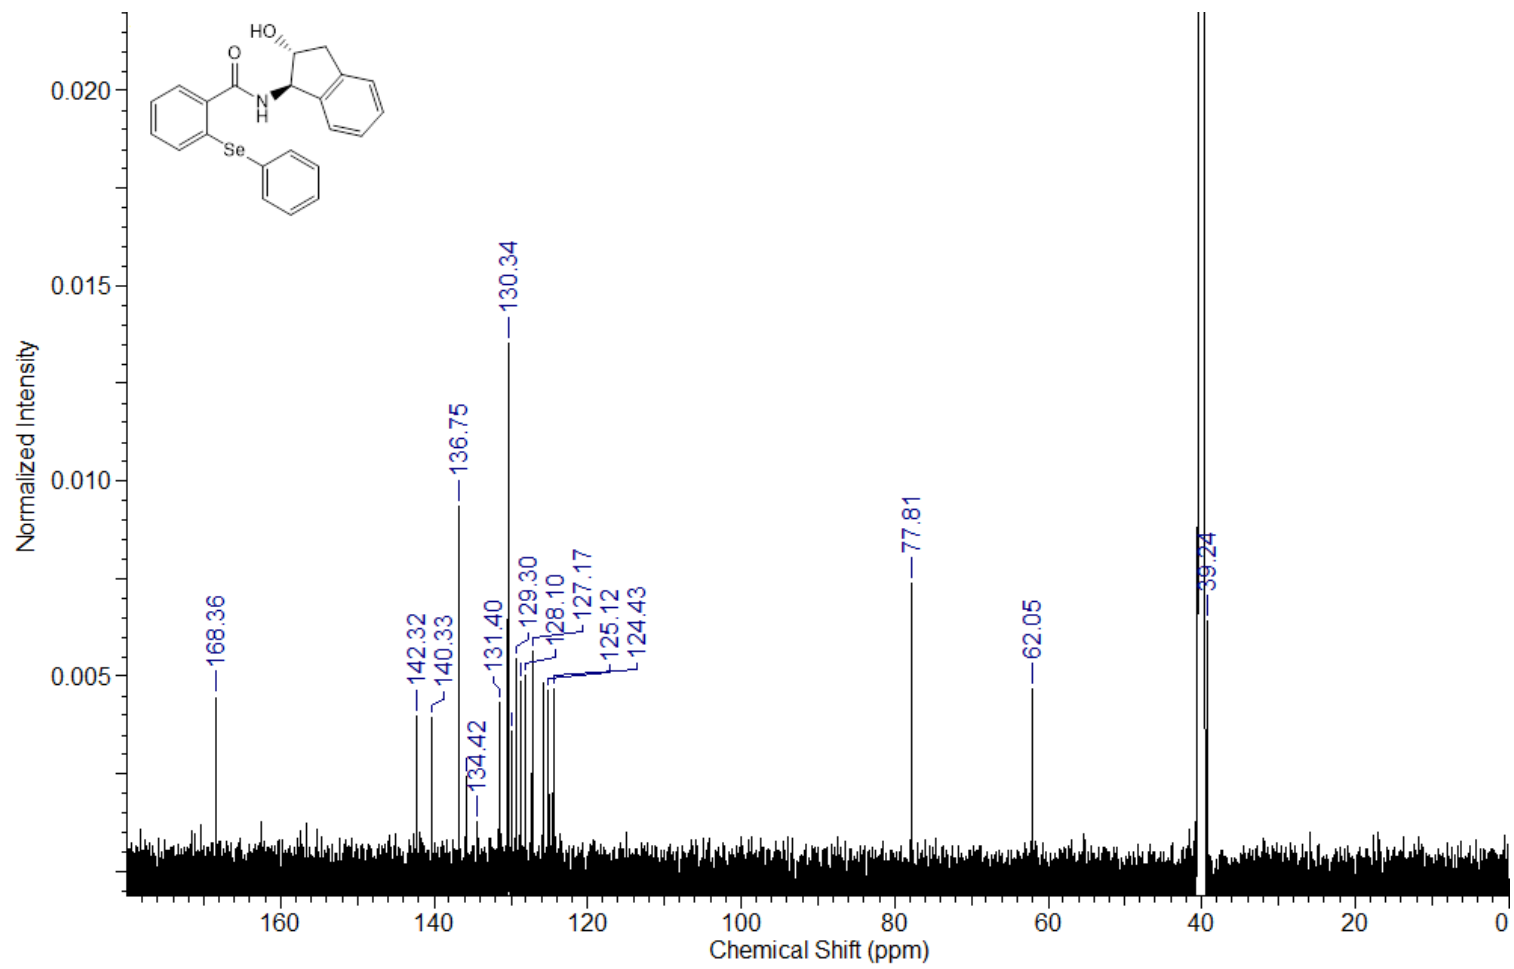

<sup>13</sup>C NMR spectra



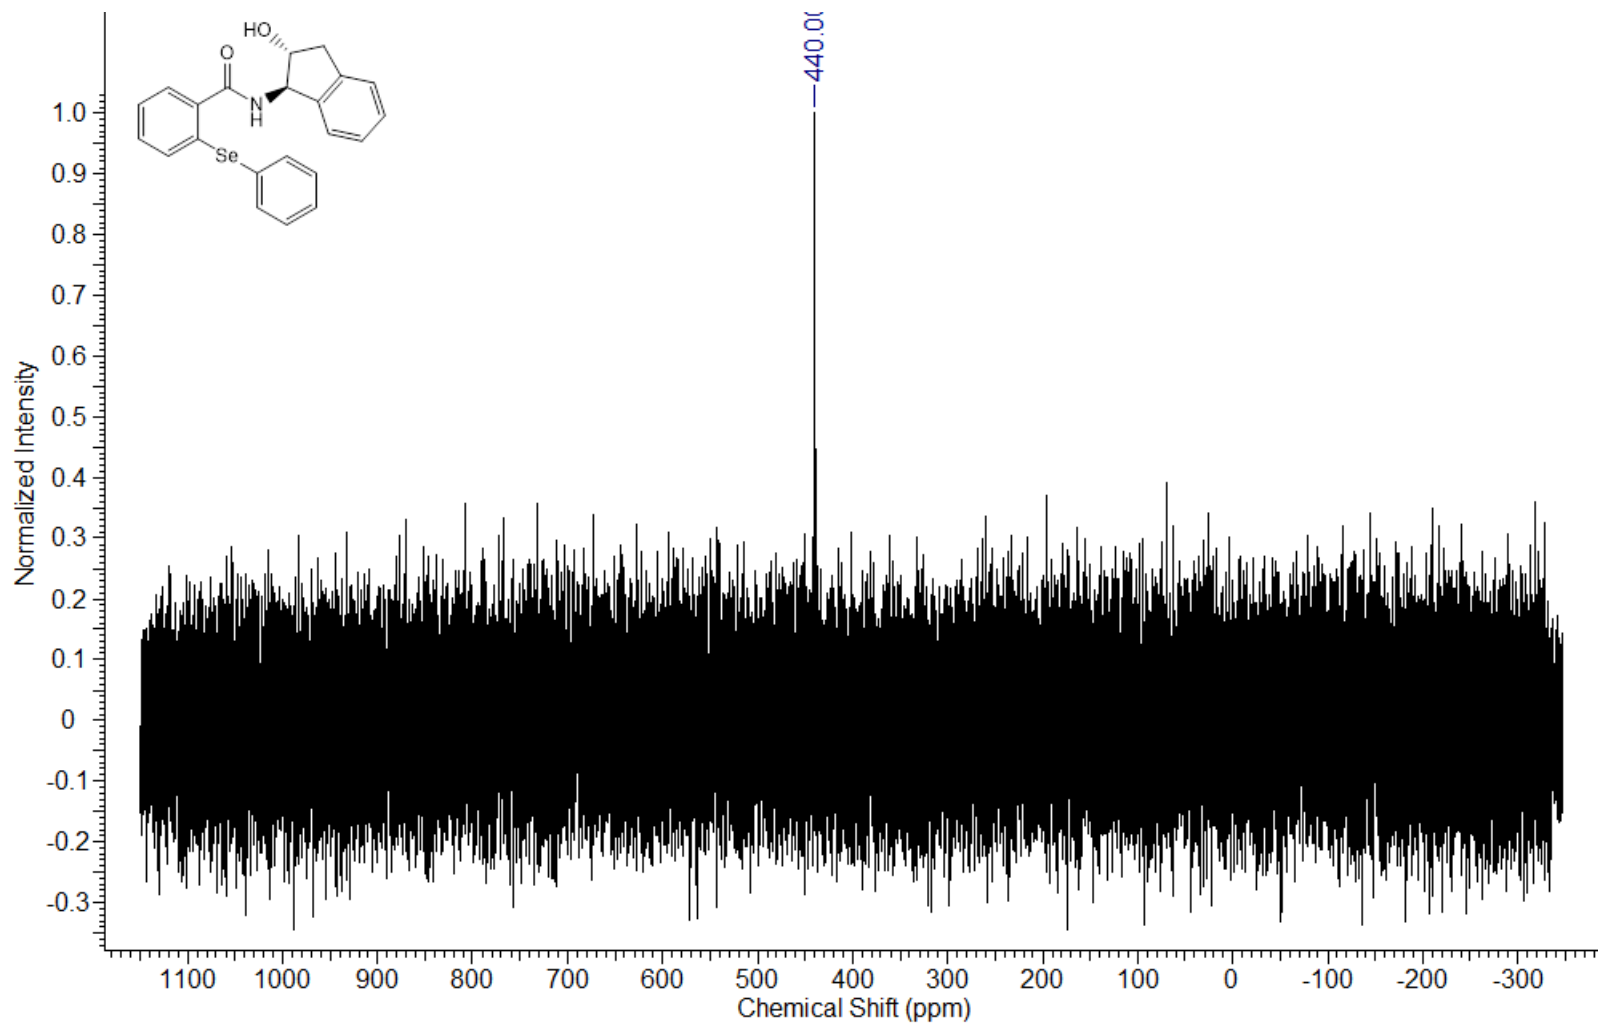

$^{77}\text{Se}$  NMR spectra

### **3. Cell lines and cell culture:**

The promyelocytic leukemia (HL-60) and breast cancer adenocarcinoma (MCF-7) cell lines were purchased from the European Collection of Cell Cultures (ECACC). Leukemia cells were cultured in RPMI 1640 plus GlutaMax I medium (Gibco/Life Technologies, Carlsbad, CA, USA). MCF-7 cells were maintained in Minimum Essential Medium Eagle (Sigma Aldrich, St. Louis, MO, USA) supplemented with 2 mM glutamine and Men Non-essential amino acid solution (Sigma Aldrich, St. Louis, MO, USA). Both media were supplemented with 10% heat-inactivated fetal bovine serum (Biological Industries, Beit-Haemek, Israel) and antibiotics (100 U/mL penicillin and 100 µg/mL streptomycin)(Sigma-Aldrich, St. Louis, MO, USA). Cells were maintained at 37°C in 5% CO<sub>2</sub> atmosphere and grown until 80% confluent.
